# Supplementary material for: Aromatic C–H coupling with hindered arylboronic acids by Pd/Fe dual catalysts
Source: Royal Society of Chemistry journal article supplement (doi:10.1039/c3sc51206a), 2013-01-01

*Supplementary Information (Yamaguchi, Kondo, Yamaguchi, Itami)*  
**Aromatic C–H Coupling with Hindered Arylboronic Acids by Pd/Fe Dual Catalysts**

Supplementary Information

---

**Aromatic C–H Coupling with Hindered Arylboronic Acids  
by Pd/Fe Dual Catalysts**

Kazuya Yamaguchi,<sup>a</sup> Hiroki Kondo,<sup>a</sup> Junichiro Yamaguchi,<sup>\*a</sup> and Kenichiro Itami<sup>\*a,b</sup>

<sup>a</sup> *Department of Chemistry, Graduate School of Science, Nagoya University, Chikusa, Nagoya 464-8602,  
Japan*

<sup>b</sup> *Institute of Transformative Bio-Molecules (WPI-ITbM), Nagoya University, Chikusa, Nagoya 464-8602,  
Japan*

E-mail: junichiro@chem.nagoya-u.ac.jp, itami.kenichiro@a.mbox.nagoya-u.ac.jp

---

**Table of Contents**

|      |                                                                    |         |
|------|--------------------------------------------------------------------|---------|
| 1.   | General                                                            | S2      |
| 2.   | Preparation of Ligand (sox)                                        | S3      |
| 3-1. | General Procedure for C–H Coupling with Hindered Arylboronic Acids | S4      |
| 3-2. | Compound Data of Coupling Products                                 | S4–S12  |
| 4.   | Investigation of Reaction Parameters                               | S13–S14 |
| 5.   | Preparation of Pd(OAc) <sub>2</sub> /sox Complex                   | S15     |
| 6.   | X-ray Crystal Structure Analysis of Pd-sox                         | S16–S17 |
| 7-1. | Enantioselective C–H Coupling                                      | S18     |
| 7-2. | Reaction Optimization of Enantioselective C–H Coupling             | S19     |
| 8.   | HPLC Chart of <b>3Ad</b>                                           | S20     |
| 9.   | References                                                         | S21     |
| 10.  | <sup>1</sup> H NMR and <sup>13</sup> C NMR Spectra                 | S22–S61 |

## Aromatic C–H Coupling with Hindered Arylboronic Acids by Pd/Fe Dual Catalysts

### 1. General

Unless otherwise noted, all materials including dry solvents were obtained from commercial suppliers and used as received. 1-methyl-6,7-dihydro-1*H*-indol-4(5*H*)-one (**1J**),<sup>1</sup> 2-methylnaphthalen-1-ylboronic acid (**2b**),<sup>2</sup> 2-isopropynaphthalen-1-ylboronic acid (**2d**),<sup>3</sup> and **L4**,<sup>4</sup> **L5**,<sup>5</sup> **L10 (sox)**<sup>6</sup> were synthesized according to procedures reported in the literature. Unless otherwise noted, all reactions were performed with dry solvents under an atmosphere of argon in flame-dried glassware using standard vacuum-line techniques. All C–H bond arylation reactions were performed in screw cap 20 mL glass vessel tubes and heated in an 8-well reaction block (heater + magnetic stirrer) unless otherwise noted. All work-up and purification procedures were carried out with reagent-grade solvents in air.

Analytical thin-layer chromatography (TLC) was performed using E. Merck silica gel 60 F<sub>254</sub> precoated plates (0.25 mm). The developed chromatogram was analyzed by UV lamp (254 nm). Flash column chromatography was performed with E. Merck silica gel 60 (230–400 mesh). Preparative thin-layer chromatography (PTLC) was performed using Wakogel B5-F silica coated plates (0.75 mm) prepared in our laboratory. Preparative high performance liquid chromatography (preparative HPLC) was performed with a Biotage Isolera®, one equipped with Biotage SNAP Cartridge KP-C18-HS columns using acetonitrile/water as an eluent. Gas chromatography (GC) analysis was conducted on a Shimadzu GC-2010 instrument equipped with a HP-5 column (30 m × 0.25 mm, Hewlett-Packard). GCMS analysis was conducted on a Shimadzu GCMS-QP2010 instrument equipped with a HP-5 column (30 m × 0.25 mm, Hewlett-Packard). High-resolution mass spectra (HRMS) were obtained from JMS-T100TD (DART) or JMS-700 (FAB) instruments. Chiral HPLC analysis was conducted on a Shimadzu Prominence 2000 instrument equipped with DAICEL Chiracel OD-H (4.6 mm x 250 mm). Nuclear magnetic resonance (NMR) spectra were recorded on JEOL ECS-400 (<sup>1</sup>H 400 MHz, <sup>13</sup>C 100 MHz) or JEOL ECA-600 (<sup>1</sup>H 600 MHz, <sup>13</sup>C 150 MHz) spectrometers. Chemical shifts for <sup>1</sup>H NMR are expressed in parts per million (ppm) relative to tetramethylsilane (δ 0.00 ppm). Chemical shifts for <sup>13</sup>C NMR are expressed in ppm relative to CDCl<sub>3</sub> (δ 77.0 ppm). Data are reported as follows: chemical shift, multiplicity (s = singlet, d = doublet, dd = doublet of doublets, t = triplet, q = quartet, sep = septet, m = multiplet, br = broad signal), coupling constant (Hz), and integration.

## Aromatic C–H Coupling with Hindered Arylboronic Acids by Pd/Fe Dual Catalysts

### 2. Preparation of Ligand (sox)

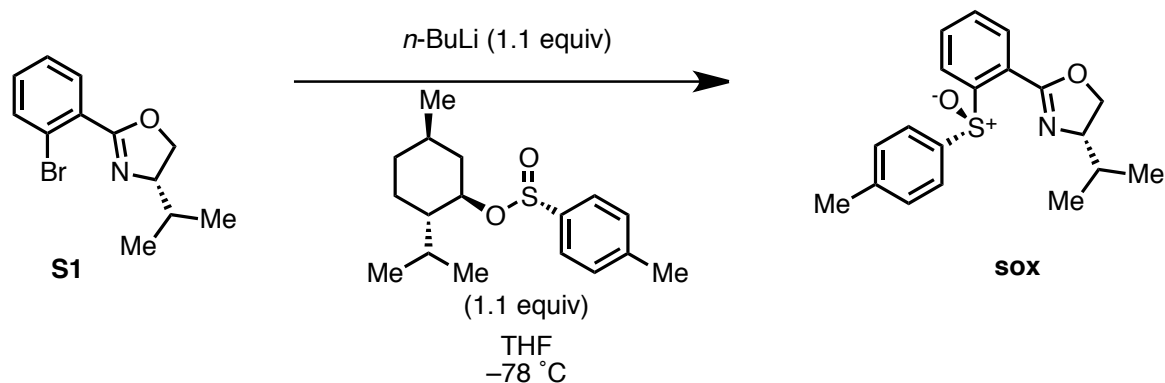

To a solution of (*S*)-2-(2-bromophenyl)-4-isopropyl-4,5-dihydrooxazole<sup>7</sup> (**S1**: 678 mg, 3.0 mmol) in THF (15 mL) was slowly added *n*-BuLi (1.6 M in hexane, 2.1 mL, 3.3 mmol) at -78 °C under nitrogen atmosphere. After stirring at -78 °C for 1 h, a solution of (1*R*,2*S*,5*R*)-(-)-menthyl (*S*)-*p*-toluenesulfonate (971 mg, 3.3 mmol) in THF (15 mL) was added dropwise, stirred at -78 °C for 30 min, then room temperature for 30 min. To the mixture was added saturated aqueous NH<sub>4</sub>Cl and the mixture was extracted with EtOAc. The organic layer was washed with water, brine, dried over anhydrous Na<sub>2</sub>SO<sub>4</sub> and evaporated under reduced pressure. The residue was purified by silica-gel column chromatography (hexane/EtOAc = 3:1) to give the desired product (**sox**) as a white solid. <sup>1</sup>H NMR (400 MHz, CDCl<sub>3</sub>) δ 8.34 (dd, *J* = 8.2, 1.4 Hz, 1H), 7.91 (dd, *J* = 7.8, 1.4 Hz, 1H), 7.75–7.68 (m, 1H), 7.58–7.48 (m, 3H), 7.16 (d, *J* = 8.2 Hz, 2H), 4.34 (dd, *J* = 9.2, 7.3 Hz, 1H), 4.15–4.01 (m, 2H), 2.32 (s, 3H), 1.82–1.70 (m, 1H), 0.90 (d, *J* = 6.8 Hz, 3H), 0.72 (d, *J* = 6.8 Hz, 3H); <sup>13</sup>C NMR (100 MHz, CDCl<sub>3</sub>) δ 160.65, 146.19, 143.62, 140.85, 131.79, 130.19, 129.68, 129.47, 126.45, 125.56, 125.28, 73.29, 69.84, 32.44, 21.28, 18.93, 17.85; HRMS (DART) *m/z* calcd for C<sub>19</sub>H<sub>22</sub>NO<sub>2</sub>S [M+H]<sup>+</sup>: 328.1371, found: 328.1373.

## Aromatic C–H Coupling with Hindered Arylboronic Acids by Pd/Fe Dual Catalysts

### 3-1. General Procedure for C–H Coupling with Hindered Arylboronic Acid

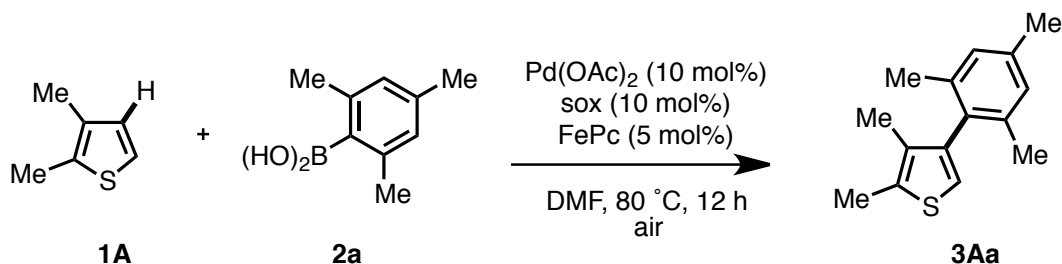

To a screw cap 20 mL glass vessel containing a magnetic stirring bar were added 2,3-dimethyl thiophene (**1A**: 28 mg, 0.25 mmol), mesitylboronic acid (**2a**: 164 mg, 1.0 mmol), Pd(OAc)<sub>2</sub> (5.6 mg, 0.025 mmol), Sox (8.2 mg, 0.025 mmol), FePc (7.1 mg, 0.0125 mmol) and DMF (0.2 mL). The mixture was stirred at 80 °C for 12 h under air, cooled to room temperature, passed through a short pad of silica gel (EtOAc) and the filtrate was evaporated under reduced pressure. The residue was purified by preparative thin-layer chromatography (hexane) to give **3Aa** (50 mg, 86%, C4/C5 = 99:1) as a colorless oil. The yield was as isolated yield, and C4/C5 ratio was determined by <sup>1</sup>H NMR.

**2,3-Dimethyl-4-(2-methylnaphthalen-1-yl)thiophene**<sup>3</sup> (**3Aa**): <sup>1</sup>H NMR (400 MHz, CDCl<sub>3</sub>) δ 6.91 (s, 2H), 6.68 (s, 1H), 2.40 (s, 3H), 2.32 (s, 3H), 1.97 (s, 6H), 1.76 (s, 3H).

### 3-2. Compound Data of Coupling Product.

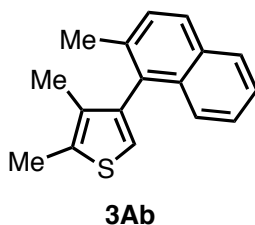

**2,3-Dimethyl-4-(2-methylnaphthalen-1-yl)thiophene**<sup>3</sup> (**3Ab**): Following the general procedure with 2,3-dimethylthiophene (**1A**: 28 mg) and (2-methylnaphthalene-1-yl)boronic acid (**2b**: 186 mg), the crude product was purified by preparative thin-layer chromatography (hexane) to give **3Ab** (58 mg, 92%, C4/C5 = 98:2) as a colorless oil. <sup>1</sup>H NMR (400 MHz, CDCl<sub>3</sub>) δ 7.86–7.73 (m, 2H), 7.44–7.31 (m, 4H), 6.84 (s, 1H), 2.47 (s, 3H), 2.22 (s, 3H), 1.71 (s, 3H).

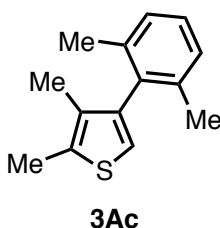



## Aromatic C–H Coupling with Hindered Arylboronic Acids by Pd/Fe Dual Catalysts

**4-(2,6-dimethylphenyl)-2,3-dimethylthiophene<sup>3</sup> (3Ac):** Following the general procedure with 2,3-dimethylthiophene (**1A**: 28 mg) and (2,6-dimethylphenyl)boronic acid (**2c**: 150 mg), the crude product was purified by preparative thin-layer chromatography (hexane) to give the coupling product **3Ac** (37 mg, 69%, C4/C5 = 97:3) as a colorless oil. <sup>1</sup>H NMR (600 MHz, CDCl<sub>3</sub>) δ 7.18–7.12 (m, 1H), 7.08 (d, *J* = 7.8 Hz, 2H), 6.69 (s, 1H), 2.41 (s, 3H), 2.01 (s, 6H), 1.76 (s, 3H).

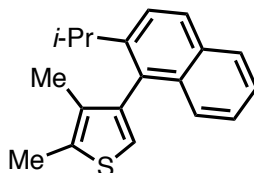

**3Ad**

**4-(2-Isopropyl-1-naphthalen-1-yl)-2,3-dimethylthiophene<sup>3</sup> (3Ad):** Following the general procedure with 2,3-dimethylthiophene (**1A**: 28 mg) and (2-isopropyl-1-naphthalen-1-yl)boronic acid (**2d**: 214 mg), the crude product was purified by preparative thin-layer chromatography (hexane) to give the coupling product **3Ad** (49 mg, 70%, C4/C5 = 90:10) as a colorless oil. <sup>1</sup>H NMR (400 MHz, CDCl<sub>3</sub>) δ 7.85 (d, *J* = 8.7 Hz, 1H), 7.81 (d, *J* = 8.2 Hz, 1H), 7.52 (d, *J* = 8.7 Hz, 1H), 7.43–7.29 (m, 3H), 6.85 (s, 1H), 2.97–2.85 (m, 1H), 2.47 (s, 3H), 1.71 (s, 3H), 1.20 (d, *J* = 7.3 Hz, 3H), 1.17 (d, *J* = 6.9 Hz, 3H).

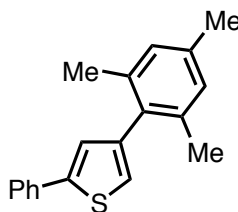

**3Ba**

**4-Mesityl-2-phenylthiophene (3Ba):** Following the general procedure with 2-phenylthiophene (**1B**: 40 mg) and mesitylboronic acid (**2a**: 164 mg), the crude product was purified by preparative thin-layer chromatography (hexane) to give **3Ba** (37 mg, 53%, C4/C5 = 99:1) as a colorless oil. <sup>1</sup>H NMR (400 MHz, CDCl<sub>3</sub>) δ 7.64–7.62 (m, 2H), 7.38 (t, *J* = 8.0 Hz, 2H), 7.32–7.25 (m, 1H), 7.15 (d, *J* = 1.2 Hz, 1H), 6.96–6.94 (m, 3H), 2.33 (s, 3H), 2.12 (s, 6H); <sup>13</sup>C NMR (100 MHz, CDCl<sub>3</sub>) δ 143.97, 141.69, 136.96, 136.91, 134.41, 133.90, 128.89, 128.05, 127.44, 125.67, 125.05, 121.89, 21.03, 20.71; HRMS (DART) *m/z* calcd for C<sub>19</sub>H<sub>19</sub>S [M+H]<sup>+</sup>: 279.1207, found: 279.1209.

## Aromatic C–H Coupling with Hindered Arylboronic Acids by Pd/Fe Dual Catalysts

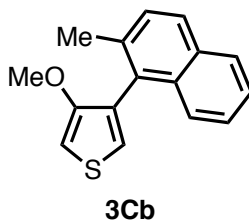

**3-Methoxy-4-(2-methylnaphthalen-1-yl)thiophene (3Cb):** Following the general procedure with 3-methoxythiophene (**1C**: 29 mg) and (2-methylnaphthalene-1-yl)boronic acid (**2b**: 186 mg), the crude product was purified by preparative thin-layer chromatography (hexane/EtOAc = 50:1) to give **3Cb** (40 mg, 63%, C4/C5 = >99:1) as a colorless oil. <sup>1</sup>H NMR (400 MHz, CDCl<sub>3</sub>) δ 7.82–7.76 (m, 2H), 7.52 (d, *J* = 9.1 Hz, 1H), 7.41–7.33 (m, 3H), 7.08 (d, *J* = 3.4 Hz, 1H), 6.43 (d, *J* = 3.4 Hz, 1H), 3.74 (s, 3H), 2.28 (s, 3H); <sup>13</sup>C NMR (100 MHz, CDCl<sub>3</sub>) δ 156.96, 135.07, 133.37, 131.93, 130.97, 130.59, 128.45, 127.78, 127.72, 125.88, 125.77, 124.72, 123.39, 96.59, 57.48, 20.51; HRMS (DART) *m/z* calcd for C<sub>16</sub>H<sub>15</sub>OS [M+H]<sup>+</sup>: 255.0844, found: 255.0845.

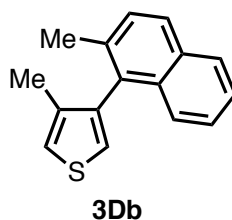

**3-Methyl-4-(2-methylnaphthalen-1-yl)thiophene<sup>3</sup> (3Db):** Following the general procedure with 3-methylthiophene (**3D**: 25 mg) and 2-methylnaphthalene-1-ylboronic acid (**2b**: 186 mg), the crude product was purified by preparative thin-layer chromatography (hexane) to give **3Db** (40 mg, 67%, C4/C5 = >99:1) as a colorless oil. <sup>1</sup>H NMR (400 MHz, CDCl<sub>3</sub>) δ 7.84–7.76 (m, 2H), 7.42–7.34 (m, 4H), 7.13–7.12 (m, 1H), 7.08 (d, *J* = 3.2 Hz, 1H), 2.22 (s, 3H), 1.86 (s, 3H).

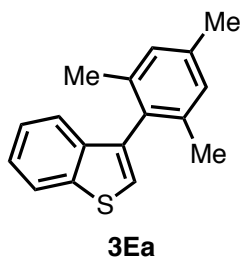

**3-Mesitylbenzo[*b*]thiophene (3Ea):** Following the general procedure with benzo[*b*]thiophene (**1E**: 34 mg) and mesitylboronic acid (**2a**: 164 mg), the crude product was purified by preparative thin-layer chromatography (hexane) to give **3Ea** (46 mg, 73%, C4/C5 = >99:1) as a colorless oil. <sup>1</sup>H NMR (400

## Aromatic C–H Coupling with Hindered Arylboronic Acids by Pd/Fe Dual Catalysts

MHz, CDCl<sub>3</sub>) δ 7.91 (dd, *J* = 8.0, 1.2 Hz, 1H), 7.39–7.33 (m, 1H), 7.32–7.25 (m, 2H), 7.18 (s, 1H), 6.99 (s, 2H), 2.37 (s, 3H), 1.98 (s, 6H); <sup>13</sup>C NMR (100 MHz, CDCl<sub>3</sub>) δ 140.00, 138.89, 137.71, 137.30, 136.40, 131.91, 128.12, 124.23, 124.08, 123.30, 122.74, 122.67, 21.11, 20.24; HRMS (DART) *m/z* calcd for C<sub>17</sub>H<sub>17</sub>S [M+H]<sup>+</sup>: 253.1051, found: 253.1051.

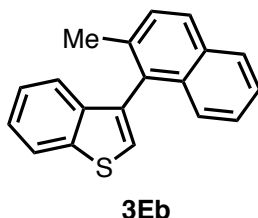

**3-(2-Methylnaphthalen-1-yl)benzo[*b*]thiophene<sup>3</sup> (3Eb):** Following the general procedure with benzo[*b*]thiophene (**1E**: 34 mg) and (2-methylnaphthalen-1-yl)boronic acid (**2b**: 186 mg), the crude product was purified by preparative thin-layer chromatography (hexane) to give **3Eb** (55 mg, 80%, C4/C5 = >99:1) as a colorless oil. <sup>1</sup>H NMR (400 MHz, CDCl<sub>3</sub>) δ 7.97 (d, *J* = 8.1 Hz, 1H), 7.86 (d, *J* = 8.1 Hz, 1H), 7.84 (d, *J* = 8.5 Hz, 1H), 7.46 (d, *J* = 8.5 Hz, 1H), 7.42–7.32 (m, 4H), 7.30–7.19 (m, 2H), 7.15 (d, *J* = 8.1 Hz, 1H), 2.21 (s, 3H).

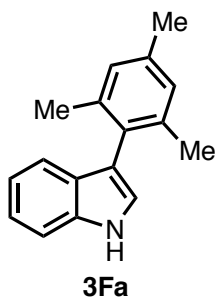

**3-Mesityl-1H-indole (3Fa):** Following the general procedure with indole (**1F**: 29 mg) and mesitylboronic acid (**2a**: 164 mg), the crude product was purified by preparative thin-layer chromatography (hexane/EtOAc = 5:1) to give **3Fa** (34 mg, 57%, C3/C2 = 88:12) as a orange oil. <sup>1</sup>H NMR (400 MHz, CDCl<sub>3</sub>) δ 8.17 (brs, 1H), 7.45–7.41 (m, 1H), 7.26–7.18 (m, 2H), 7.10–7.01 (m, 2H), 6.99 (s, 2H), 2.36 (s, 3H), 2.06 (s, 6H); <sup>13</sup>C NMR (100 MHz, CDCl<sub>3</sub>) δ 138.41, 136.52, 135.97, 130.86, 127.96, 127.37, 122.40, 121.93, 119.89, 119.55, 115.82, 111.02, 21.06, 20.77; HRMS (DART) *m/z* calcd for C<sub>17</sub>H<sub>18</sub>N [M+H]<sup>+</sup>: 236.1439, found: 236.1439.

## Aromatic C–H Coupling with Hindered Arylboronic Acids by Pd/Fe Dual Catalysts

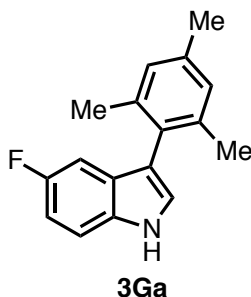

**5-Fluoro-3-mesityl-1H-indole (3Ga):** Following the general procedure with 5-fluoro-1H-indole (**1G**: 34 mg) and mesitylboronic acid (**2a**: 164 mg), the crude product was purified by preparative thin-layer chromatography (hexane/EtOAc = 5:1) to give **3Ga** (29 mg, 47%, C3/C2 = 87:13) as a purple solid.  $^1\text{H}$  NMR (400 MHz,  $\text{CDCl}_3$ )  $\delta$  8.18 (s, 1H), 7.36–7.32 (m, 1H), 7.08 (d,  $J = 2.0$  Hz, 1H), 6.98–6.93 (m, 3H), 6.90–6.78 (m, 1H), 2.35 (s, 3H), 2.05 (s, 6H);  $^{13}\text{C}$  NMR (100 MHz,  $\text{CDCl}_3$ )  $\delta$  156.56 (d,  $J_{\text{FC}} = 236$  Hz), 138.31, 136.78, 132.47, 130.28, 128.04, 127.88 (d,  $J_{\text{FC}} = 15$  Hz), 124.19, 116.07 (d,  $J_{\text{FC}} = 4.8$  Hz), 111.61 (d,  $J_{\text{FC}} = 9.6$  Hz), 110.39 (d,  $J_{\text{FC}} = 27$  Hz), 104.58 ( $J_{\text{FC}} = 23$  Hz), 21.06, 20.71; HRMS (DART)  $m/z$  calcd for  $\text{C}_{17}\text{H}_{17}\text{FN}$   $[\text{M}+\text{H}]^+$ : 254.1345, found: 254.1345.

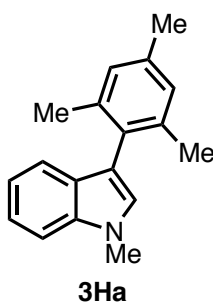

**3-Mesityl-1-methyl-1H-indole (3Ha):** Following the general procedure with *N*-methylindole (**1H**: 33 mg) and mesitylboronic acid (**2a**: 164 mg), the crude product was purified by preparative thin-layer chromatography (hexane/EtOAc = 5:1) to give **3Ha** (31 mg, 49%) as a white solid.  $^1\text{H}$  NMR (400 MHz,  $\text{CDCl}_3$ )  $\delta$  7.39–7.35 (m, 1H), 7.27–7.22 (m, 2H), 7.09–7.04 (m, 1H), 6.98 (s, 2H), 6.87 (s, 1H), 3.85 (s, 3H), 2.35 (s, 3H), 2.06 (s, 6H);  $^{13}\text{C}$  NMR (150 MHz,  $\text{CDCl}_3$ )  $\delta$  138.39, 136.83, 136.35, 130.99, 127.95, 127.85, 127.09, 121.43, 120.04, 118.98, 114.27, 109.10, 32.77, 21.06, 20.87; HRMS (DART)  $m/z$  calcd for  $\text{C}_{18}\text{H}_{20}\text{N}$   $[\text{M}+\text{H}]^+$ : 250.1596, found: 250.1596.

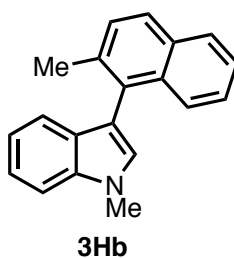

## Aromatic C–H Coupling with Hindered Arylboronic Acids by Pd/Fe Dual Catalysts

**1-Methyl-3-(2-methylnaphthalen-1-yl)-1H-indole (3Hb):** Following the general procedure with *N*-methylindole (**1H**: 33 mg) and (2-methylnaphthalene-1-yl)boronic acid (**2b**: 186 mg), the crude product was purified by preparative thin-layer chromatography (hexane/EtOAc = 7:1) to give **3Hb** (53mg, 86%, C3/C2= 87:13) as a white solid. <sup>1</sup>H NMR (400 MHz, CDCl<sub>3</sub>) δ 7.85 (d, *J* = 8.4 Hz, 1H), 7.81 (d, *J* = 8.4 Hz, 1H), 7.65 (d, *J* = 8.8 Hz, 1H), 7.46 (t, *J* = 9.2 Hz, 2H), 7.41–7.37 (m, 1H), 7.31–7.25 (m, 2H), 7.17 (d, *J* = 8.0 Hz, 1H), 7.08–7.04 (m, 2H), 3.93 (s, 3H), 2.32 (s, 3H); <sup>13</sup>C NMR (100 MHz, CDCl<sub>3</sub>) δ 136.82, 135.46, 134.24, 132.08, 130.62, 128.67, 128.53, 128.26, 127.68, 127.04, 126.61, 125.53, 124.60, 121.64, 120.35, 119.24, 112.84, 109.22, 32.88, 21.15; HRMS (DART) *m/z* calcd for C<sub>20</sub>H<sub>18</sub>N [M+H]<sup>+</sup>: 272.1439, found: 272.1439.

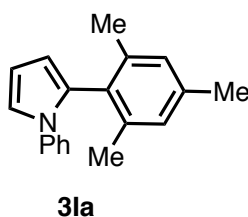

**2-Mesityl-1-phenyl-1H-pyrrole (3Ia):** Following the general procedure with 1-phenyl-1H-pyrrole (**1I**: 36 mg) and mesitylboronic acid (**2a**: 164 mg), the crude product was purified by preparative thin-layer chromatography (hexane/EtOAc = 20:1) and reverse phase HPLC using Isolera® to give **3Ia** (27 mg, 41%) as a purple solid. <sup>1</sup>H NMR (400 MHz, CDCl<sub>3</sub>) δ 7.22–7.18 (m, 2H), 7.15–7.13 (m, 1H), 7.04–6.99 (m, 3H), 6.81 (s, 2H), 6.38 (t, *J* = 3.2 Hz, 1H), 6.14–6.11 (m, 1H), 2.26 (s, 3H), 1.98 (s, 6H); <sup>13</sup>C NMR (150 MHz, CDCl<sub>3</sub>) δ 140.60, 138.57, 137.48, 131.18, 130.23, 128.70, 127.94, 125.76, 123.75, 121.03, 110.72, 108.87, 21.08, 20.54; HRMS (DART) *m/z* calcd for C<sub>19</sub>H<sub>20</sub>N [M+H]<sup>+</sup>: 262.1596, found: 262.1597.

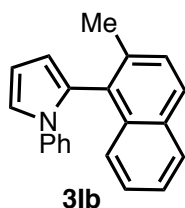

**2-(2-Methylnaphthalen-1-yl)-1-phenyl-1H-pyrrole (3Ib):** Following the general procedure with 1-phenyl-1H-pyrrole (**1I**: 36 mg) and (2-methylnaphthalene-1-yl)boronic acid (**2b**: 186 mg), the crude product was purified by preparative thin-layer chromatography (hexane/EtOAc = 20:1) and reverse phase HPLC using Isolera® to give **3Ib** (35 mg, 49%) as a brown solid. <sup>1</sup>H NMR (400 MHz, CDCl<sub>3</sub>) δ 7.83–7.75 (m, 2H), 7.71 (d, *J* = 8.4 Hz, 1H), 7.43–7.37 (m, 2H), 7.22 (d, *J* = 8.4 Hz, 1H), 7.13–7.01 (m, 4H), 6.98–6.93 (m, 2H), 6.50 (t, *J* = 4.0 Hz, 1H), 6.33–6.29 (m, 1H), 2.05 (s, 3H); <sup>13</sup>C NMR (100

## Aromatic C–H Coupling with Hindered Arylboronic Acids by Pd/Fe Dual Catalysts

MHz, CDCl<sub>3</sub>)  $\delta$  140.34, 136.57, 134.45, 131.82, 129.46, 128.61, 128.24, 128.07, 127.72, 126.16, 125.93, 124.81, 123.91, 121.69, 112.05, 109.05, 20.56; HRMS (DART)  $m/z$  calcd for C<sub>21</sub>H<sub>18</sub>N [M+H]<sup>+</sup>: 284.1439, found: 284.1437.

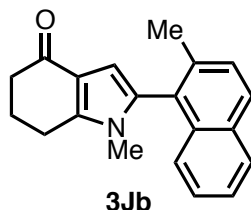

**1-Methyl-2-(2-methylnaphthalen-1-yl)-6,7-dihydro-1H-indol-4(5H)-one (3Jb):** Following the general procedure with 1-methyl-6,7-dihydro-1H-indol-4(5H)-one (**1J**: 37 mg) and (2-methylnaphthalene-1-yl)boronic acid (**2b**: 186 mg), the crude product was purified by preparative thin-layer chromatography (hexane/EtOAc = 1:1) to give **3Jb** (60 mg, 89%) as a pale yellow solid. <sup>1</sup>H NMR (400 MHz, CDCl<sub>3</sub>)  $\delta$  7.84 (dd,  $J$  = 8.7, 2.8 Hz, 2H), 7.47–7.33 (m, 4H), 6.55 (s, 1H), 3.11 (s, 3H), 2.91–2.84 (m, 2H), 2.62–2.53 (m, 2H), 2.33–2.21 (m, 5H); <sup>13</sup>C NMR (100 MHz, CDCl<sub>3</sub>)  $\delta$  194.25, 143.86, 137.02, 134.06, 131.84, 131.79, 128.80, 128.31, 127.87, 127.82, 126.54, 125.47, 125.15, 120.36, 106.22, 37.84, 30.80, 23.64, 22.16, 20.56; HRMS (DART)  $m/z$  calcd for C<sub>20</sub>H<sub>20</sub>NO [M+H]<sup>+</sup>: 290.1545, found: 290.1547.

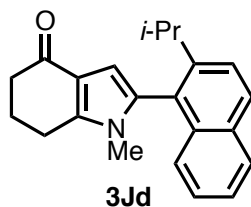

**2-(2-Isopropynaphthalen-1-yl)-1-methyl-6,7-dihydro-1H-indol-4(5H)-one (3Jd):** Following the general procedure with 1-methyl-6,7-dihydro-1H-indol-4(5H)-one (**1J**: 37 mg) and (2-isopropynaphthalene-1-yl)boronic acid (**2d**: 214 mg), the crude product was purified by preparative thin-layer chromatography (hexane/EtOAc = 1:1) to give **3Jd** (43 mg, 55%) as a pale yellow solid. <sup>1</sup>H NMR (400 MHz, CDCl<sub>3</sub>)  $\delta$  7.91 (d,  $J$  = 8.7 Hz, 1H), 7.83 (d,  $J$  = 7.8 Hz, 1H), 7.54 (d,  $J$  = 8.7 Hz, 1H), 7.45–7.38 (m, 2H), 7.31–7.24 (m, 1H), 6.57 (s, 1H), 3.10 (s, 3H), 3.03–2.92 (m, 1H), 2.90–2.81 (m, 2H), 2.62–2.51 (m, 2H), 2.31–2.21 (m, 2H), 1.22 (d,  $J$  = 6.9 Hz, 3H), 1.19 (d,  $J$  = 6.9 Hz, 3H); <sup>13</sup>C NMR (100 MHz, CDCl<sub>3</sub>)  $\delta$  194.22, 147.40, 143.77, 134.00, 131.78, 131.37, 129.48, 127.80, 126.51, 126.16, 125.78, 125.25, 123.59, 120.28, 106.51, 37.81, 30.89, 30.83, 24.51, 23.60, 23.11, 22.14; HRMS (DART)  $m/z$  calcd for C<sub>22</sub>H<sub>23</sub>NO [M+H]<sup>+</sup>: 318.1858, found: 318.1857.

## Aromatic C–H Coupling with Hindered Arylboronic Acids by Pd/Fe Dual Catalysts

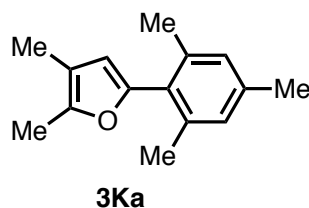

**5-Mesityl-2,3-dimethylfuran (3Ka):** To a screw cap 20 mL glass vessel containing a magnetic stirring bar were added 2,3-dimethylfuran (**1K**: 24 mg, 0.25 mmol), mesitylboronic acid (**2a**: 164 mg, 1.0 mmol), Pd(OAc)<sub>2</sub> (5.6 mg, 0.025 mmol), FePc (7.1 mg, 0.0125 mmol) and DMSO (0.2 mL). The mixture was stirred at 80 °C for 12 h under air, cooled to room temperature, passed through a short pad of silica gel (EtOAc) and the filtrate was evaporated under reduced pressure. The residue was purified by preparative thin-layer chromatography (hexane) to give the product as a yellow oil. <sup>1</sup>H NMR (400 MHz, CDCl<sub>3</sub>) δ 6.89 (s, 2H), 6.00 (s, 1H), 2.29 (s, 3H), 2.23 (s, 3H), 2.19 (s, 6H), 2.00 (s, 3H); <sup>13</sup>C NMR (100 MHz, CDCl<sub>3</sub>) δ 149.00, 146.16, 138.05, 137.78, 128.63, 128.24, 114.46, 112.34, 21.06, 20.64, 11.33, 10.01; HRMS (DART) *m/z* calcd for C<sub>15</sub>H<sub>19</sub>O [M+H]<sup>+</sup>: 215.1436, found: 215.1438.

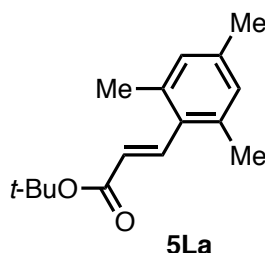

**(E)-tert-Butyl 3-mesitylacrylate (5La):** Following the general procedure with *tert*-butyl acrylate (**4L**: 32 mg) and mesitylboronic acid (**2a**: 164 mg), the crude product was purified by preparative thin-layer chromatography (hexane/EtOAc = 20:1) to give **5La** (55 mg, 89%) as a white solid. <sup>1</sup>H NMR (400 MHz, CDCl<sub>3</sub>) δ 7.74 (d, *J* = 16.5 Hz, 1H), 6.88 (s, 2H), 5.97 (d, *J* = 16.5 Hz, 1H), 2.33 (s, 6H), 2.28 (s, 3H), 1.56 (s, 9H); <sup>13</sup>C NMR (100 MHz, CDCl<sub>3</sub>) δ 166.41, 142.01, 138.02, 136.80, 131.07, 129.06, 124.85, 80.42, 28.23, 21.13, 21.01; HRMS (DART) *m/z* calcd for C<sub>16</sub>H<sub>23</sub>O<sub>2</sub> [M+H]<sup>+</sup>: 247.1698, found: 247.1698.

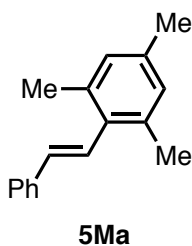

## Aromatic C–H Coupling with Hindered Arylboronic Acids by Pd/Fe Dual Catalysts

**(E)-1,3,5-Trimethyl-2-styrylbenzene (5Ma):** To a screw cap 20 mL glass vessel containing a magnetic stirring bar were added styrene (**4M**: 26 mg, 0.25 mmol), mesitylboronic acid (**2a**: 164 mg, 1.0 mmol), Pd(OAc)<sub>2</sub> (5.6 mg, 0.025 mmol), FePc (7.1 mg, 0.0125 mmol) and DMSO (0.2 mL). The mixture was stirred at 80 °C for 12 h under air, cooled to room temperature, passed through a short pad of silica gel (EtOAc) and the filtrate was evaporated under reduced pressure. The residue was purified by preparative thin-layer chromatography (hexane) to give **5Ma** (54 mg, 98%) as a white solid. <sup>1</sup>H NMR (400 MHz, CDCl<sub>3</sub>) δ 7.50 (d, *J* = 7.8 Hz, 2H), 7.37 (t, *J* = 7.8 Hz, 2H), 7.30–7.25 (m, 1H), 7.10 (d, *J* = 16.4 Hz, 1H), 6.91 (s, 2H), 6.59 (d, *J* = 16.4 Hz, 1H), 2.34 (s, 6H), 2.29 (s, 3H); <sup>13</sup>C NMR (100 MHz, CDCl<sub>3</sub>) δ 137.71, 136.30, 136.15, 133.96, 133.62, 128.69, 128.63, 127.43, 126.88, 126.20, 21.00, 20.96; HRMS (DART) *m/z* calcd for C<sub>17</sub>H<sub>19</sub> [M+H]<sup>+</sup>: 223.1487, found: 223.1482.

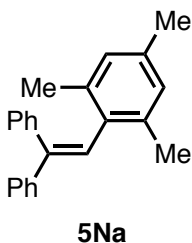

**(2-Mesitylethene-1,1-diyl)dibenzene (5Na):** Following the general procedure with ethene-1,1-diyl dibenzene (**4N**: 45 mg) and mesitylboronic acid (**2a**: 164 mg), the crude product was purified by preparative thin-layer chromatography (hexane) to give **5Na** (49 mg, 65%) as a colorless oil. <sup>1</sup>H NMR (400 MHz, CDCl<sub>3</sub>) δ 7.41–7.28 (m, 5H), 7.17–7.08 (m, 3H), 7.00–6.93 (m, 2H), 6.80 (s, 1H), 6.75 (s, 2H), 2.23 (s, 3H), 2.07 (s, 6H); <sup>13</sup>C NMR (100 MHz, CDCl<sub>3</sub>) δ 144.17, 143.56, 140.38, 136.14, 135.94, 133.91, 129.80, 128.40, 128.09, 128.03, 127.66, 127.52, 127.40, 127.05, 20.98, 20.45; HRMS (DART) *m/z* calcd for C<sub>23</sub>H<sub>23</sub> [M+H]<sup>+</sup>: 299.1800, found: 299.1801.



## Aromatic C–H Coupling with Hindered Arylboronic Acids by Pd/Fe Dual Catalysts

### 4. Investigation of Reaction Parameters.

Table S1. Effect of Solvent in Pd/FePc System.<sup>a</sup>

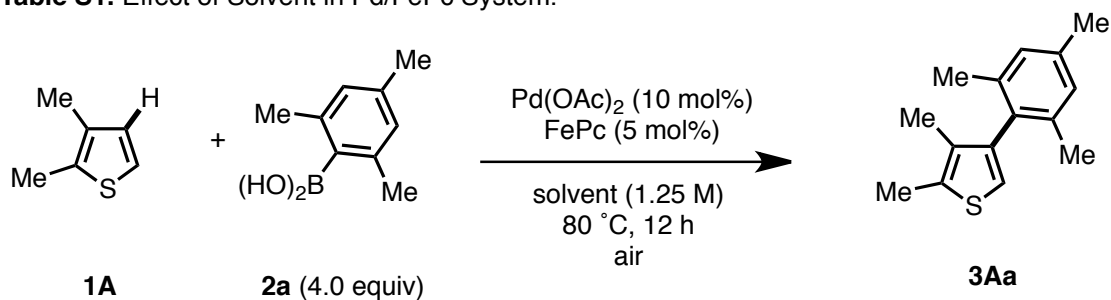

| Entry | Solvent                    | Yield/% | C4/C5 <sup>b</sup> |
|-------|----------------------------|---------|--------------------|
| 1     | DMSO                       | 83      | 95/5               |
| 2     | <i>i</i> -PrOH             | ND      | —                  |
| 3     | DMSO/ <i>i</i> -PrOH (1:1) | 92      | 95/5               |
| 4     | CH <sub>3</sub> CN         | trace   | —                  |
| 5     | toluene                    | trace   | —                  |
| 6     | DMF                        | 32      | 98/2               |
| 7     | DMAc                       | 7       | 97/3               |
| 8     | NMP                        | 12      | 97/3               |

a: Conditions: **1A** (0.25 mmol), **2a** (1.0 mmol), Pd(OAc)<sub>2</sub> (0.025 mmol), FePc (0.0125 mmol) in solvent (0.2 mL), 80 °C, under air. b: Determined by <sup>1</sup>H NMR.

Aromatic C–H Coupling with Hindered Arylboronic Acids by Pd/Fe Dual Catalysts

**Table S2.** Effect of Solvent in Pd/DMSO/FePc System.<sup>a</sup>

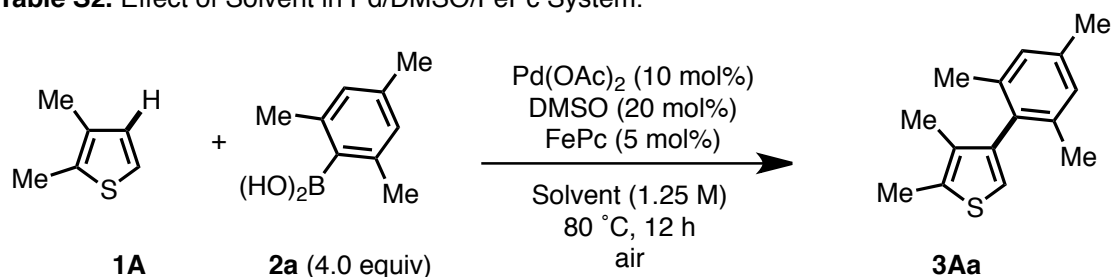

| Entry | Solvent        | Yield/% | C4/C5 <sup>b</sup> |
|-------|----------------|---------|--------------------|
| 1     | DMF            | 86      | 99/1               |
| 2     | DMAc           | 67      | 98/2               |
| 3     | NMP            | 23      | 98/2               |
| 4     | DME            | 23      | 98/2               |
| 5     | toluene        | trace   | —                  |
| 6     | DCE            | trace   | —                  |
| 7     | <i>i</i> -PrOH | trace   | —                  |
| 8     | AmylOH         | 11      | 98/2               |

a: Conditions: **1A** (0.25 mmol), **2a** (1.0 mmol), Pd(OAc)<sub>2</sub> (0.025 mmol), DMSO (0.050 mmol), FePc (0.0125 mmol) in solvent (0.2 mL), 80 °C, under air. b: Determined by <sup>1</sup>H NMR.

**Table S3.** Effect of Arylboronic Acid.<sup>a</sup>

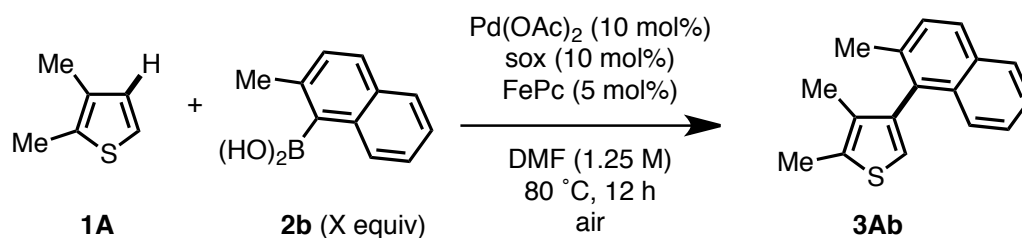

| Entry | <b>2b</b> /equiv | Yield/% | C4/C5 <sup>b</sup> |
|-------|------------------|---------|--------------------|
| 1     | 4.0              | 92      | 96/4               |
| 2     | 2.0              | 89      | 97/3               |
| 3     | 1.5              | 77      | 98/2               |
| 4     | 1.0              | 61      | 98/2               |

a: Conditions: **1A** (0.25 mmol), **2b** (X equiv), Pd(OAc)<sub>2</sub> (0.025 mmol), sox (0.025 mmol), FePc (0.0125 mmol) in DMF (0.2 mL), 80 °C, under air. b: Determined by <sup>1</sup>H NMR.

## Aromatic C–H Coupling with Hindered Arylboronic Acids by Pd/Fe Dual Catalysts

### 5. Preparation of Pd(OAc)<sub>2</sub>/sox complex.

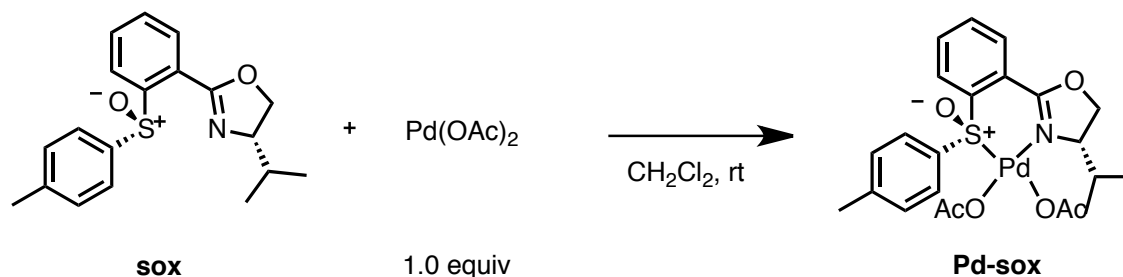

Crystals of Pd(OAc)<sub>2</sub>/sox (**Pd-sox**) were obtained by vapor diffusion of pentane into a CHCl<sub>3</sub> solution of Pd(OAc)<sub>2</sub> and **sox** (1.0 equiv) at room temperature. Pd(OAc)<sub>2</sub> (11.2 mg, 0.050 mmol) and **sox** (16.4 mg, 0.050 mmol) were dissolved with dichloromethane (1.0 mL). The solution was evaporated under reduced pressure. The residue was dissolved with CHCl<sub>3</sub> and then transferred into a vial containing pentane. The vial was sealed with a Teflon cap and maintained at room temperature. Yellow crystalline plate formed. <sup>1</sup>H NMR (400 MHz, CDCl<sub>3</sub>) δ 8.41 (d, *J* = 8.2 Hz, 1H), 8.18 (d, *J* = 8.7 Hz, 2H), 8.08–7.97 (m, 2H), 7.88–7.81 (m, 1H), 7.30 (d, *J* = 8.7 Hz, 2H), 4.46 (t, *J* = 9.6 Hz, 1H), 4.36–4.24 (m, 2H), 2.54–2.41 (m, 1H), 2.39 (s, 3H), 2.07 (s, 3H), 2.03 (s, 3H), 0.85 (d, *J* = 6.9 Hz, 3H), 0.09 (d, *J* = 6.9 Hz, 3H); <sup>13</sup>C NMR (100 MHz, CDCl<sub>3</sub>) δ 178.02, 160.54, 145.39, 140.46, 136.93, 134.66, 133.60, 132.38, 130.50, 130.32, 128.31, 127.18, 120.90, 69.97, 69.61, 29.95, 22.19, 21.56, 19.35, 13.78; HRMS (FAB) *m/z* calcd for C<sub>21</sub>H<sub>24</sub>NO<sub>4</sub>PdS [M–OAc]<sup>+</sup>: 492.0461, found: 492.0457.

## Aromatic C–H Coupling with Hindered Arylboronic Acids by Pd/Fe Dual Catalysts

### 6. X-ray Crystal Structure Analysis of Pd-sox.

A suitable crystal was mounted with mineral oil on a glass fiber and transferred to the goniometer of a Rigaku Saturn CCD diffractometer. Graphite-monochromated Mo K $\alpha$  radiation ( $\lambda = 0.71070 \text{ \AA}$ ) was used. The structures were solved by direct methods with (SIR-97)<sup>8</sup> and refined by full-matrix least-squares techniques against  $F^2$  (SHELXL-97).<sup>9</sup> The intensities were corrected for Lorentz and polarization effects. The non-hydrogen atoms were refined anisotropically. Hydrogen atoms were placed using AFIX instructions. Details of the crystal data and a summary of the intensity data collection parameters for **Pd-sox** are listed in Table S4.

**Table S4.** Crystallographic data and structure refinement details for **Pd-sox**.

| <b>Pd-sox</b>                                                                         |                                                                     |
|---------------------------------------------------------------------------------------|---------------------------------------------------------------------|
| Formula                                                                               | C <sub>24</sub> H <sub>28</sub> Cl <sub>3</sub> NO <sub>6</sub> PdS |
| Fw                                                                                    | 671.28                                                              |
| <i>T</i> (K)                                                                          | 103(2)                                                              |
| $\lambda$ (Å)                                                                         | 0.71070                                                             |
| cryst syst                                                                            | Monoclinic                                                          |
| space group                                                                           | <i>P</i> 2 <sub>1</sub>                                             |
| <i>a</i> , (Å)                                                                        | 9.3736(10)                                                          |
| <i>b</i> , (Å)                                                                        | 15.1780(11)                                                         |
| <i>c</i> , (Å)                                                                        | 10.1053(9)                                                          |
| $\alpha$ , (deg)                                                                      | 90                                                                  |
| $\beta$ , (deg)                                                                       | 107.302(4)                                                          |
| $\gamma$ , (deg)                                                                      | 90                                                                  |
| <i>V</i> , (Å <sup>3</sup> )                                                          | 1372.7(2)                                                           |
| <i>Z</i>                                                                              | 2                                                                   |
| D <sub>calc</sub> , (g / cm <sup>3</sup> )                                            | 1.642                                                               |
| <i>m</i> (mm <sup>-1</sup> )                                                          | 1.083                                                               |
| F(000)                                                                                | 680                                                                 |
| cryst size (mm)                                                                       | 0.15 × 0.15 × 0.15                                                  |
| 2 $\theta$ range, (deg)                                                               | 3.54–25.00                                                          |
| reflns collected                                                                      | 8294                                                                |
| indep reflns/ <i>R</i> <sub>int</sub>                                                 | 4743/0.0287                                                         |
| params                                                                                | 330                                                                 |
| GOF on $F^2$                                                                          | 1.024                                                               |
| <i>R</i> <sub>1</sub> , w <i>R</i> <sub>2</sub> [ <i>I</i> > 2 $\sigma$ ( <i>I</i> )] | 0.0261, 0.0686                                                      |
| <i>R</i> <sub>1</sub> , w <i>R</i> <sub>2</sub> (all data)                            | 0.0289, 0.0696                                                      |
| abs struct param                                                                      | -0.02(2)                                                            |

Supplementary Information (Yamaguchi, Kondo, Yamaguchi, Itami)  
Aromatic C–H Coupling with Hindered Arylboronic Acids by Pd/Fe Dual Catalysts

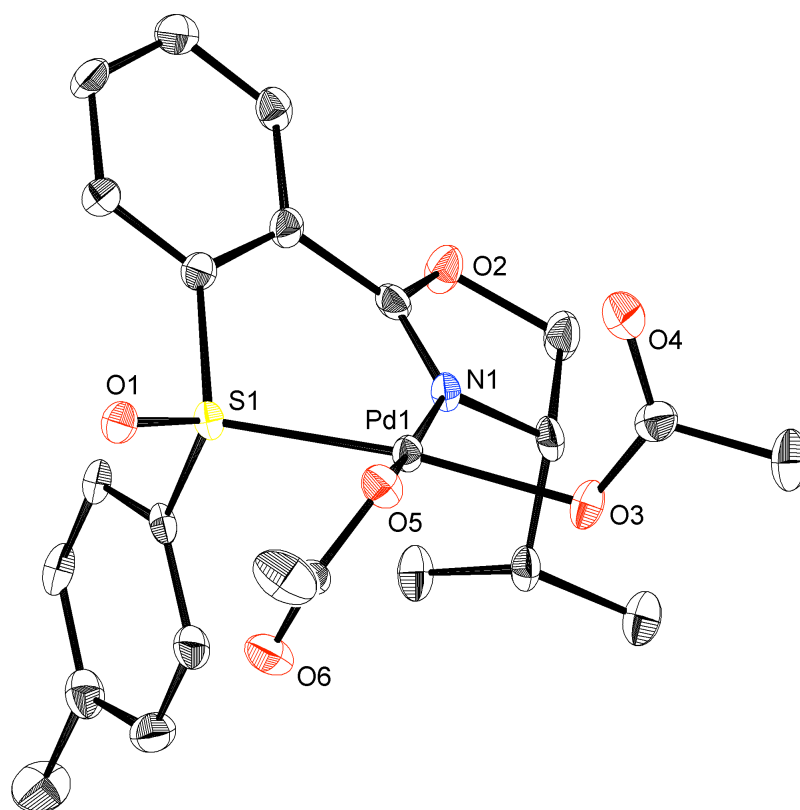

**Figure S1.** ORTEP drawing of Pd-sox with 50% thermal ellipsoid. All hydrogen atoms and solvent molecule are omitted for clarity.

## Aromatic C–H Coupling with Hindered Arylboronic Acids by Pd/Fe Dual Catalysts

### 7-1. Enantioselective C–H Coupling

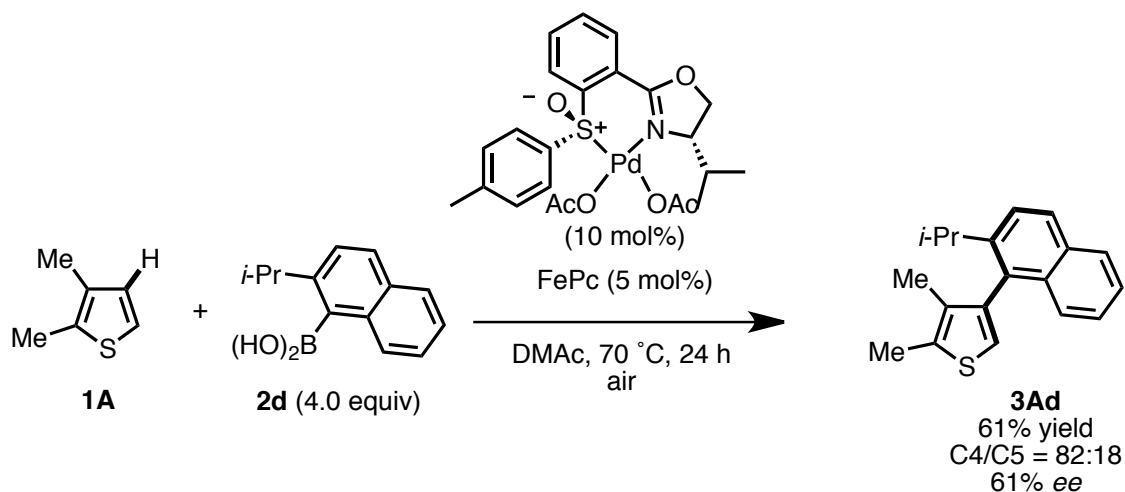

**Scheme S1.** Enantioselective C–H coupling.

To a screw cap 20 mL glass vessel containing a magnetic stirring bar were added 2,3-dimethylthiophene (**1A**: 28 mg, 0.25 mmol), (2-isopropyl-1-naphthyl)boronic acid (**2d**: 214 mg, 1.0 mmol), **Pd-sox** (13.8 mg, 0.025 mmol), FePc (7.1 mg, 0.0125 mmol) and DMAc (0.5 mL). The mixture was stirred at 70 °C for 24 h under air, cooled to room temperature, passed through a short pad of silica gel (EtOAc) and the filtrate was evaporated under reduced pressure. The residue was purified by preparative thin-layer chromatography (hexane) to give (*S*)-**3Ad** (43 mg, 61%, C4/C5 = 82:18, 61% *ee*) as a colorless oil. The enantiomeric excess was determined by HPLC with a Chiralcel OD–H column, UV detected at 254 nm, flow rate 1.0 mL/min (hexane). Retention times (*tr*); major enantiomer *tr* = 9.6 min, minor enantiomer *tr* = 7.8 min (HPLC chart is shown in p. S20). According to the literature value<sup>3</sup>, the absolute configuration was determined as *S*-configuration.

## Aromatic C–H Coupling with Hindered Arylboronic Acids by Pd/Fe Dual Catalysts

### 7-2. Reaction Optimization of Enantioselective C–H Coupling

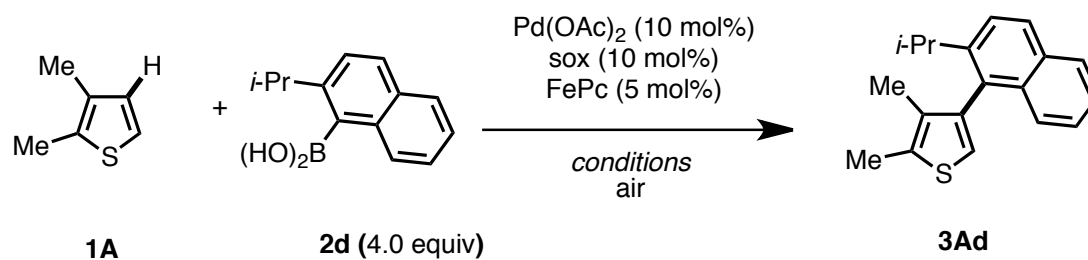

| Entry          | Solvent | Conc/ M | Temp/ °C | Time/ h | Yield/ % | C4/C5 | ee/ % |
|----------------|---------|---------|----------|---------|----------|-------|-------|
| 1              | DMF     | 1.25    | 80       | 12      | 70       | 90/10 | 45    |
| 2              | DMAc    | 1.25    | 80       | 12      | 57       | 86/14 | 55    |
| 3              | DMAc    | 0.5     | 80       | 24      | 54       | 85/15 | 58    |
| 4              | DMAc    | 0.5     | 70       | 24      | 61       | 82/18 | 61    |
| 5 <sup>a</sup> | DMAc    | 0.5     | 70       | 12      | 57       | 85/15 | 58    |
| 6 <sup>a</sup> | DMAc    | 0.5     | 70       | 24      | 77       | 85/15 | 59    |
| 7              | DMAc    | 0.5     | 60       | 24      | 52       | 87/13 | 54    |

a: 20 mol% of ligand (sox) was used.

## Aromatic C–H Coupling with Hindered Arylboronic Acids by Pd/Fe Dual Catalysts

### 8. HPLC Chart of 3Ad

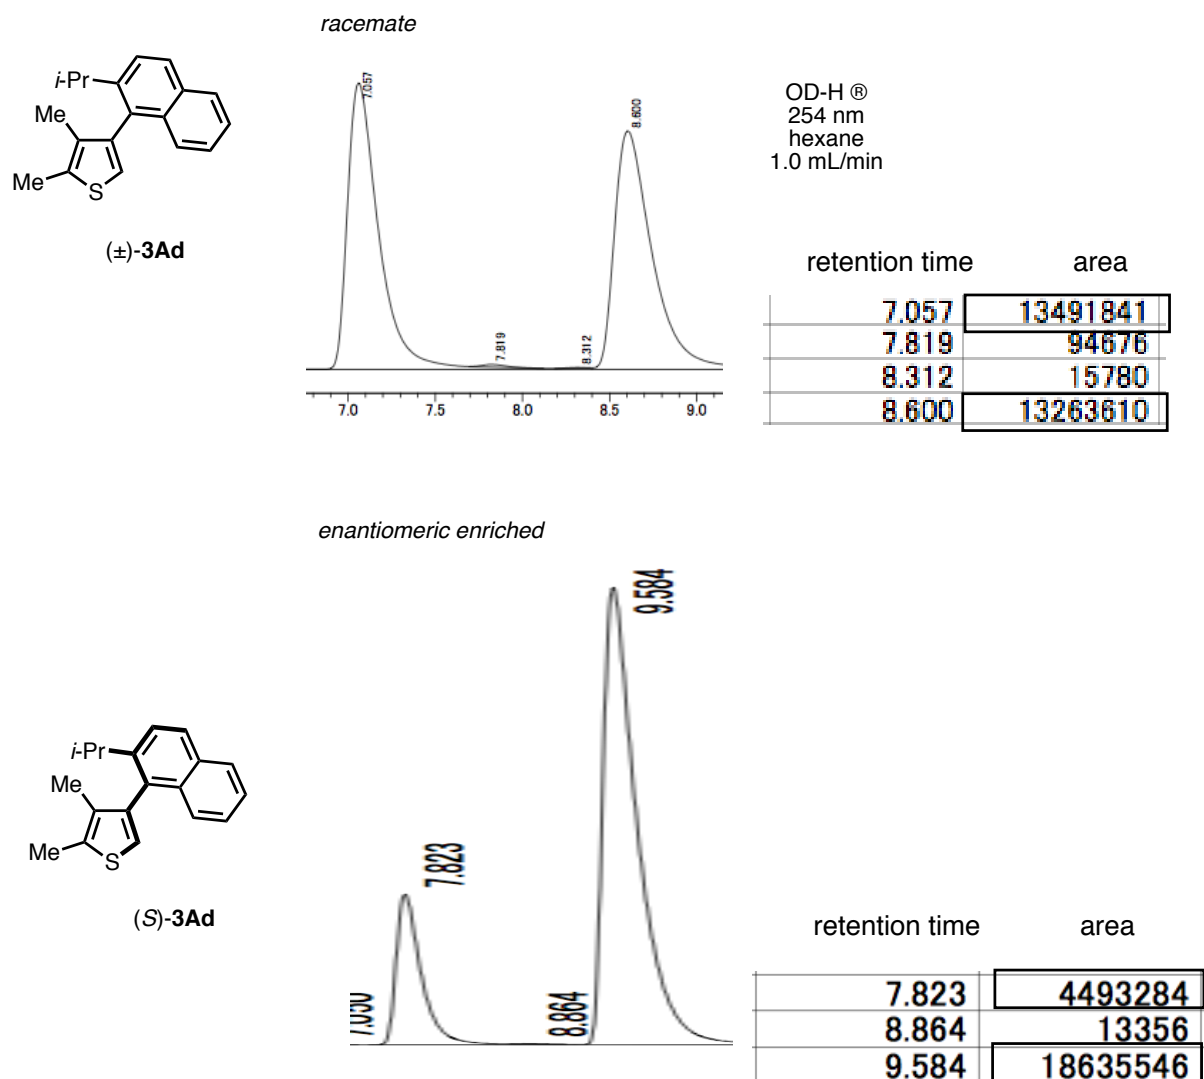



## Aromatic C–H Coupling with Hindered Arylboronic Acids by Pd/Fe Dual Catalysts

### 9. References

1. M. L. Laurila, N. A. Magnus and M. A. Staszak, *Org. Process Res. Dev.*, 2009, **13**, 1199.
2. A. N. Cammidge and K. V. L. Crépy, *Tetrahedron*, 2004, **60**, 4377.
3. K. Yamaguchi, J. Yamaguchi, A. Studer and K. Itami, *Chem. Sci.*, 2012, **3**, 2165.
4. R. Tokunoh, M. Sodeoka, K. Aoe and M. Shibasaki, *Tetrahedron Lett.*, 1995, **36**, 8035.
5. M. C. Carreño, J. L. G. Ruano and A. Urbano, *Tetrahedron Lett.*, 1989, **30**, 4003.
6. J. F. Bower and J. M. J. Williams, *Tetrahedron Lett.*, 1994, **35**, 7111.
7. D. C. Behenna and B. M. Stoltz, *J. Am. Chem. Soc.*, 2004, **126**, 15044.
8. A. Altomare, M. C. Burla, M. Camalli, G. L. Cascarano, C. Giacovazzo, A. Guagliardi, A. G. G. Moliterni, G. Polidori and R. Spagna, *J. Appl. Crystallogr.*, 1999, **32**, 115–119.
9. G. M. Sheldrick, University of Göttingen: Göttingen, Germany, 1997.

Supplementary Information (Yamaguchi, Kondo, Yamaguchi, Itami)  
Aromatic C–H Coupling with Hindered Arylboronic Acids by Pd/Fe Dual Catalysts

10.  $^1\text{H}$  NMR and  $^{13}\text{C}$  NMR Spectra  
 $^1\text{H}$  NMR (400 MHz,  $\text{CDCl}_3$ ) of 3Aa:

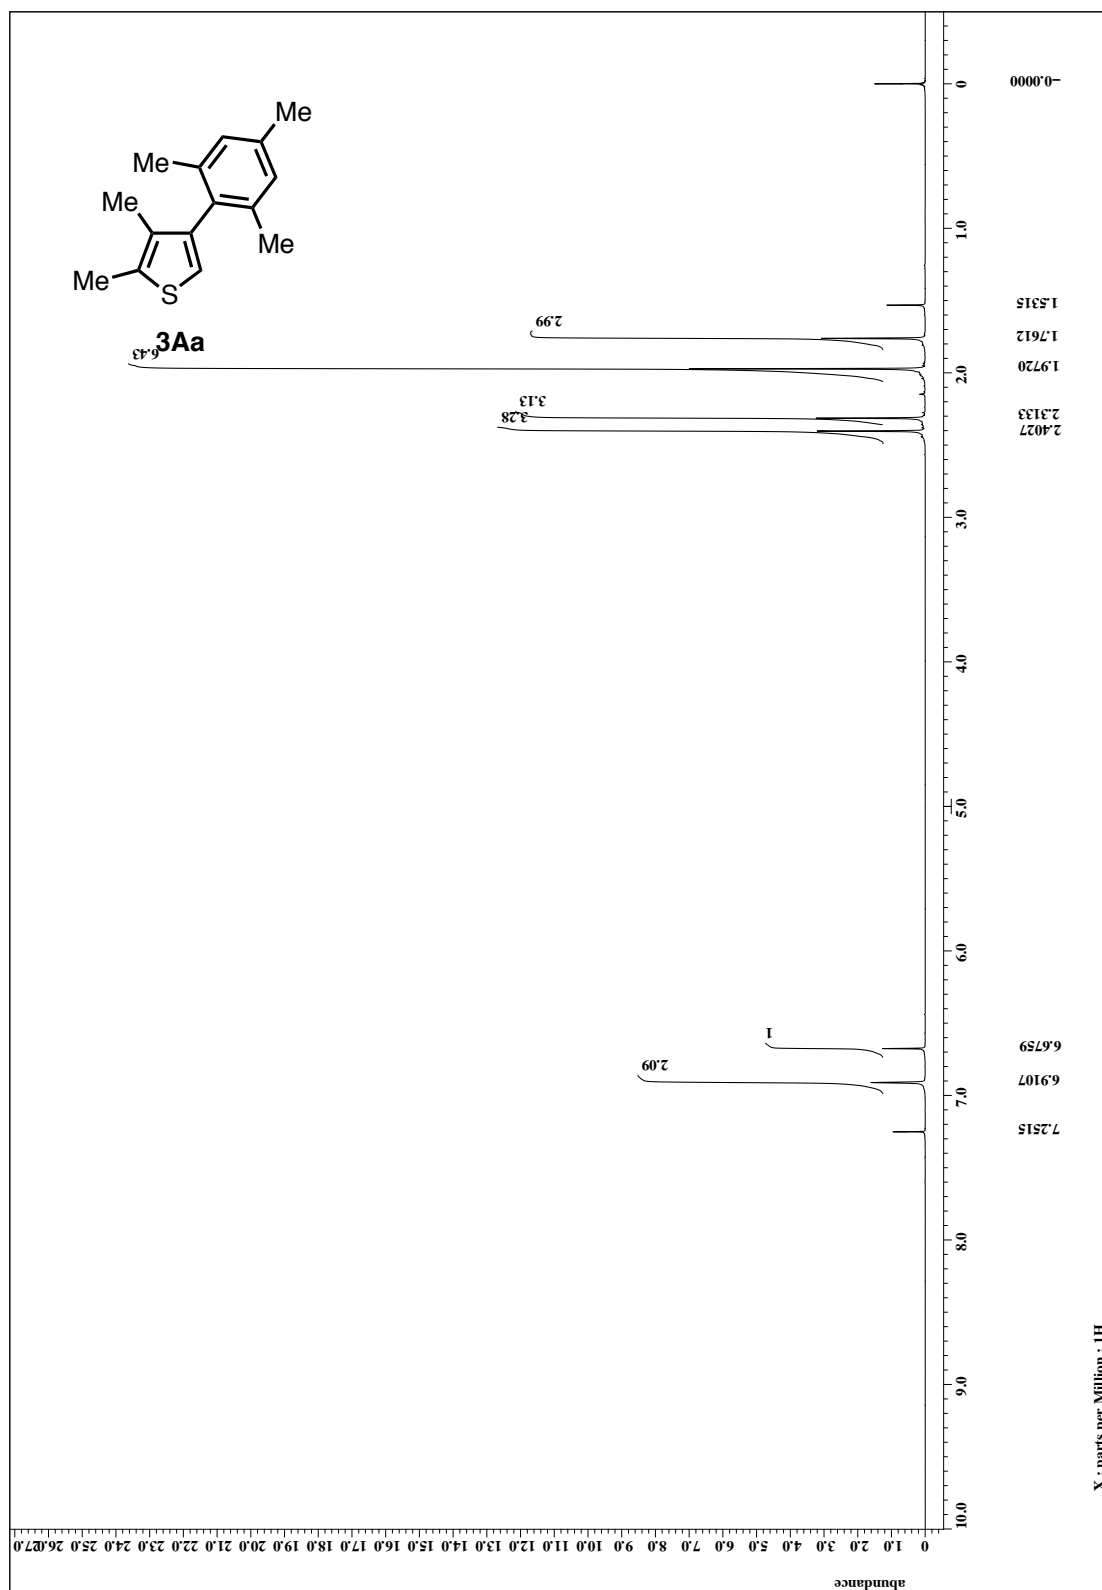

Supplementary Information (Yamaguchi, Kondo, Yamaguchi, Itami)  
Aromatic C–H Coupling with Hindered Arylboronic Acids by Pd/Fe Dual Catalysts

$^1\text{H}$  NMR (400 MHz,  $\text{CDCl}_3$ ) of 3Ab:

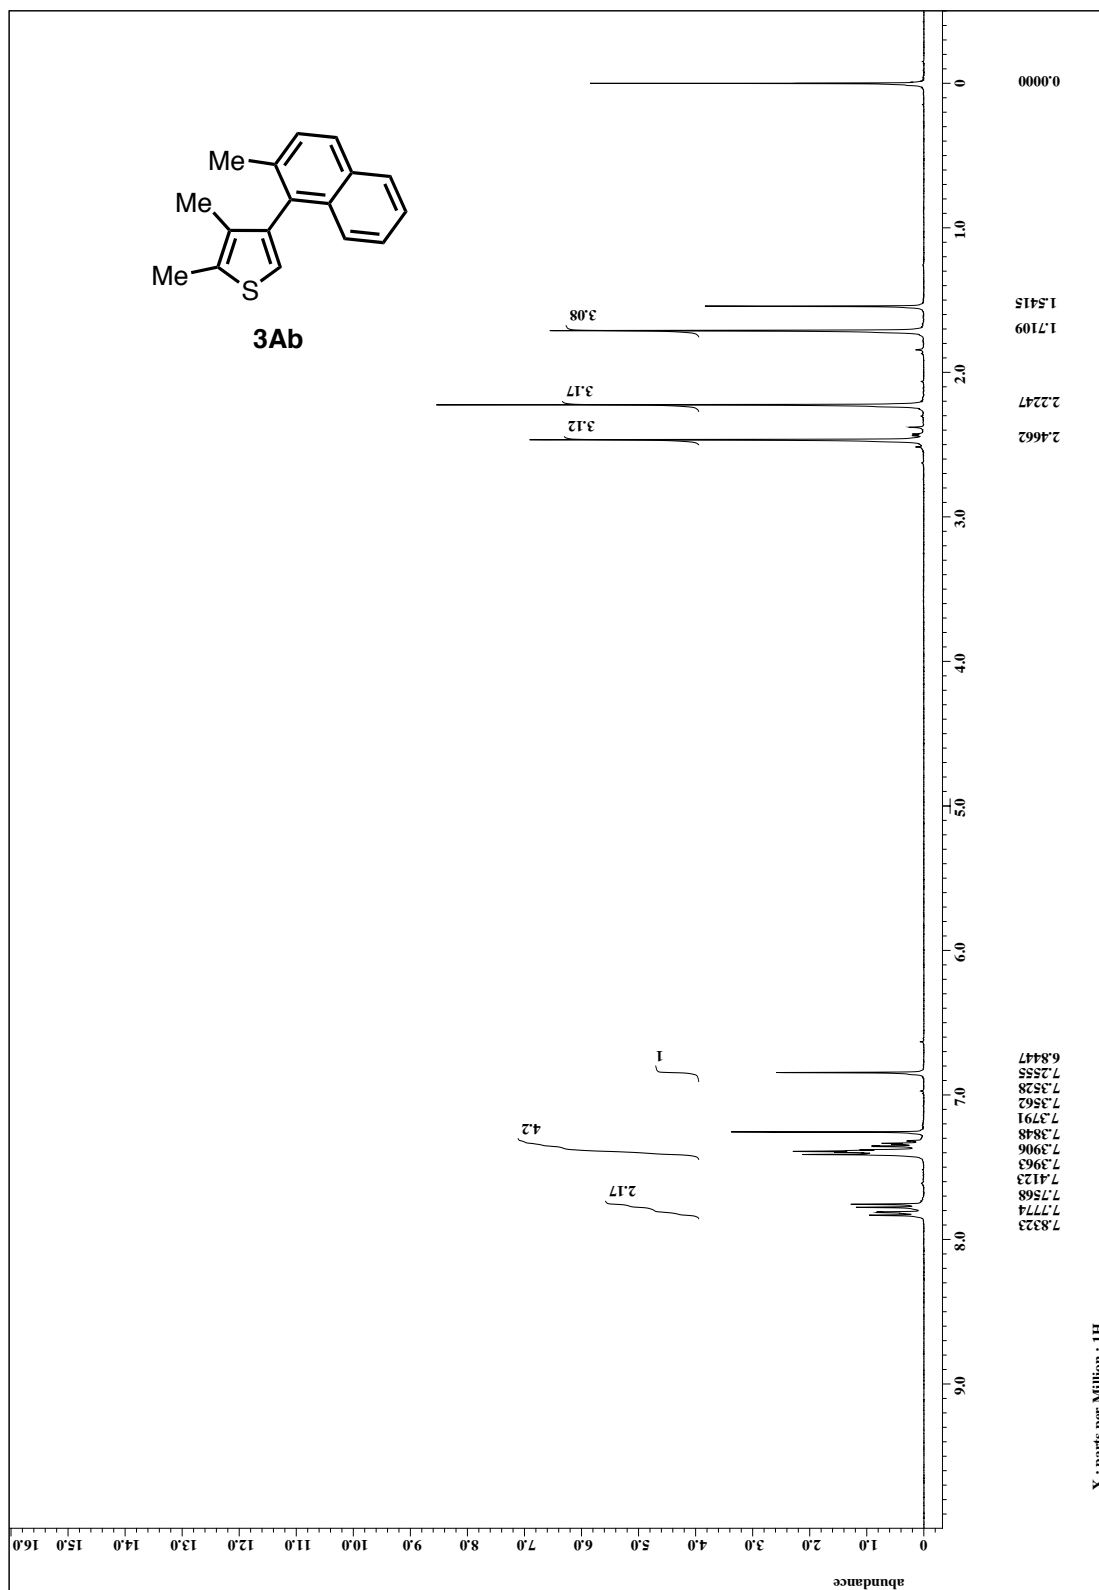

Supplementary Information (Yamaguchi, Kondo, Yamaguchi, Itami)  
Aromatic C–H Coupling with Hindered Arylboronic Acids by Pd/Fe Dual Catalysts

$^1\text{H}$  NMR (600 MHz,  $\text{CDCl}_3$ ) of 3Ac:

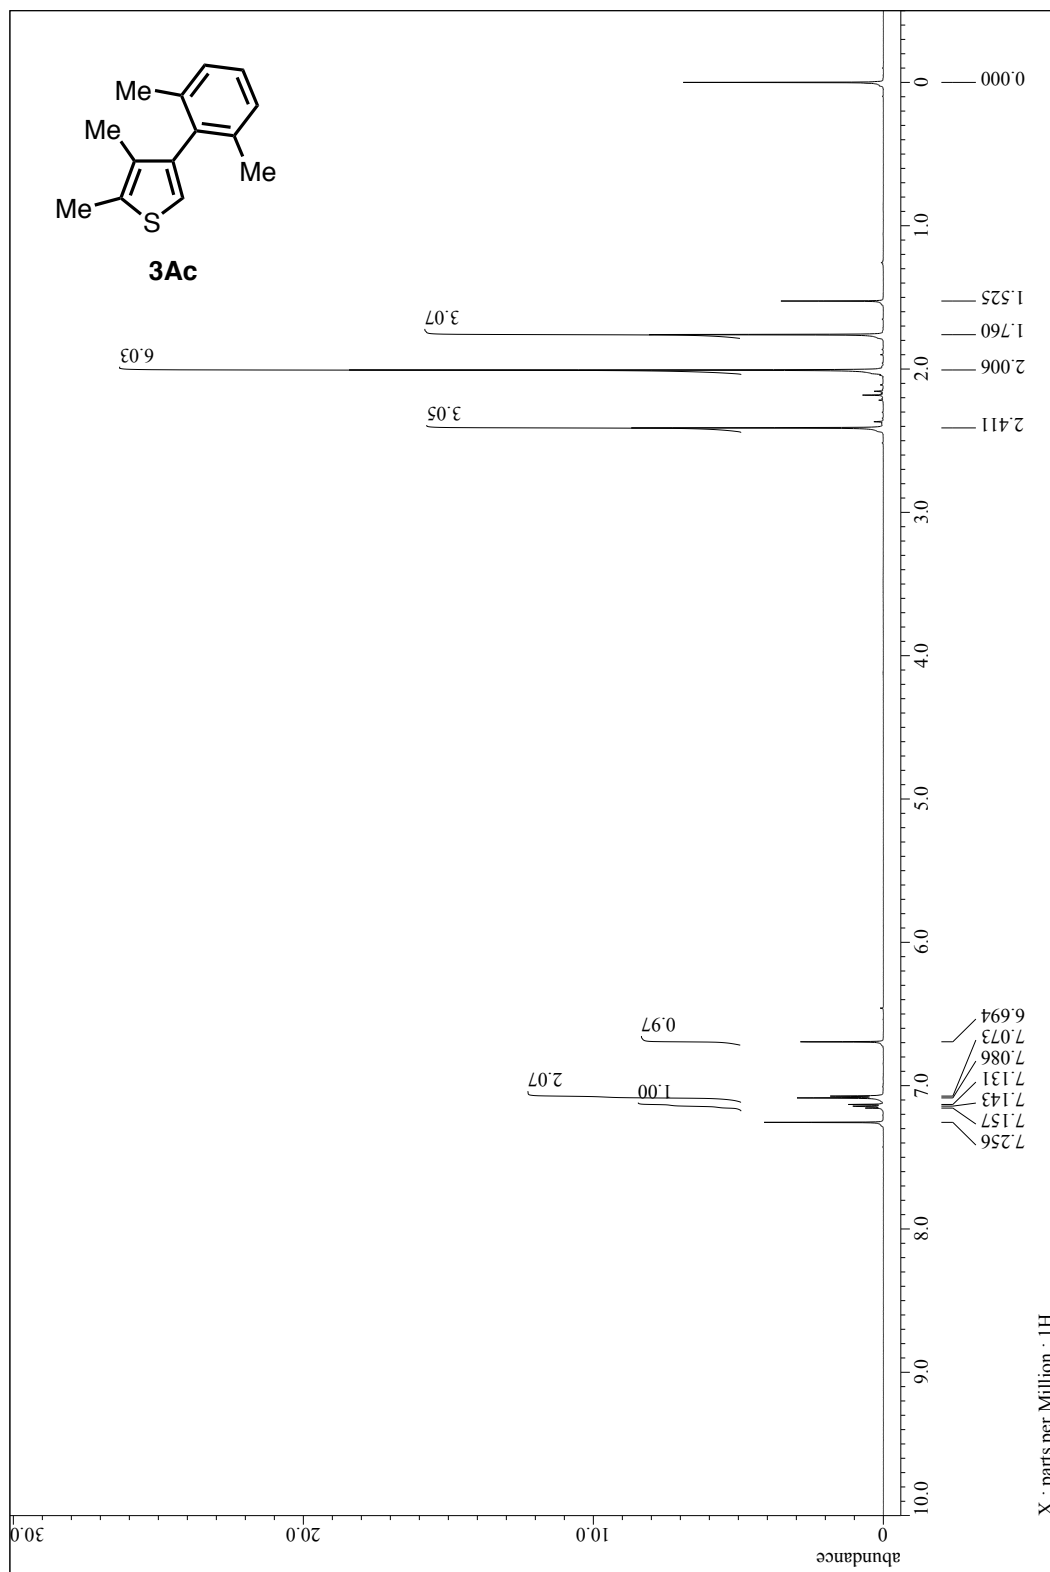

Supplementary Information (Yamaguchi, Kondo, Yamaguchi, Itami)  
Aromatic C–H Coupling with Hindered Arylboronic Acids by Pd/Fe Dual Catalysts

$^1\text{H}$  NMR (400 MHz,  $\text{CDCl}_3$ ) of 3Ad:

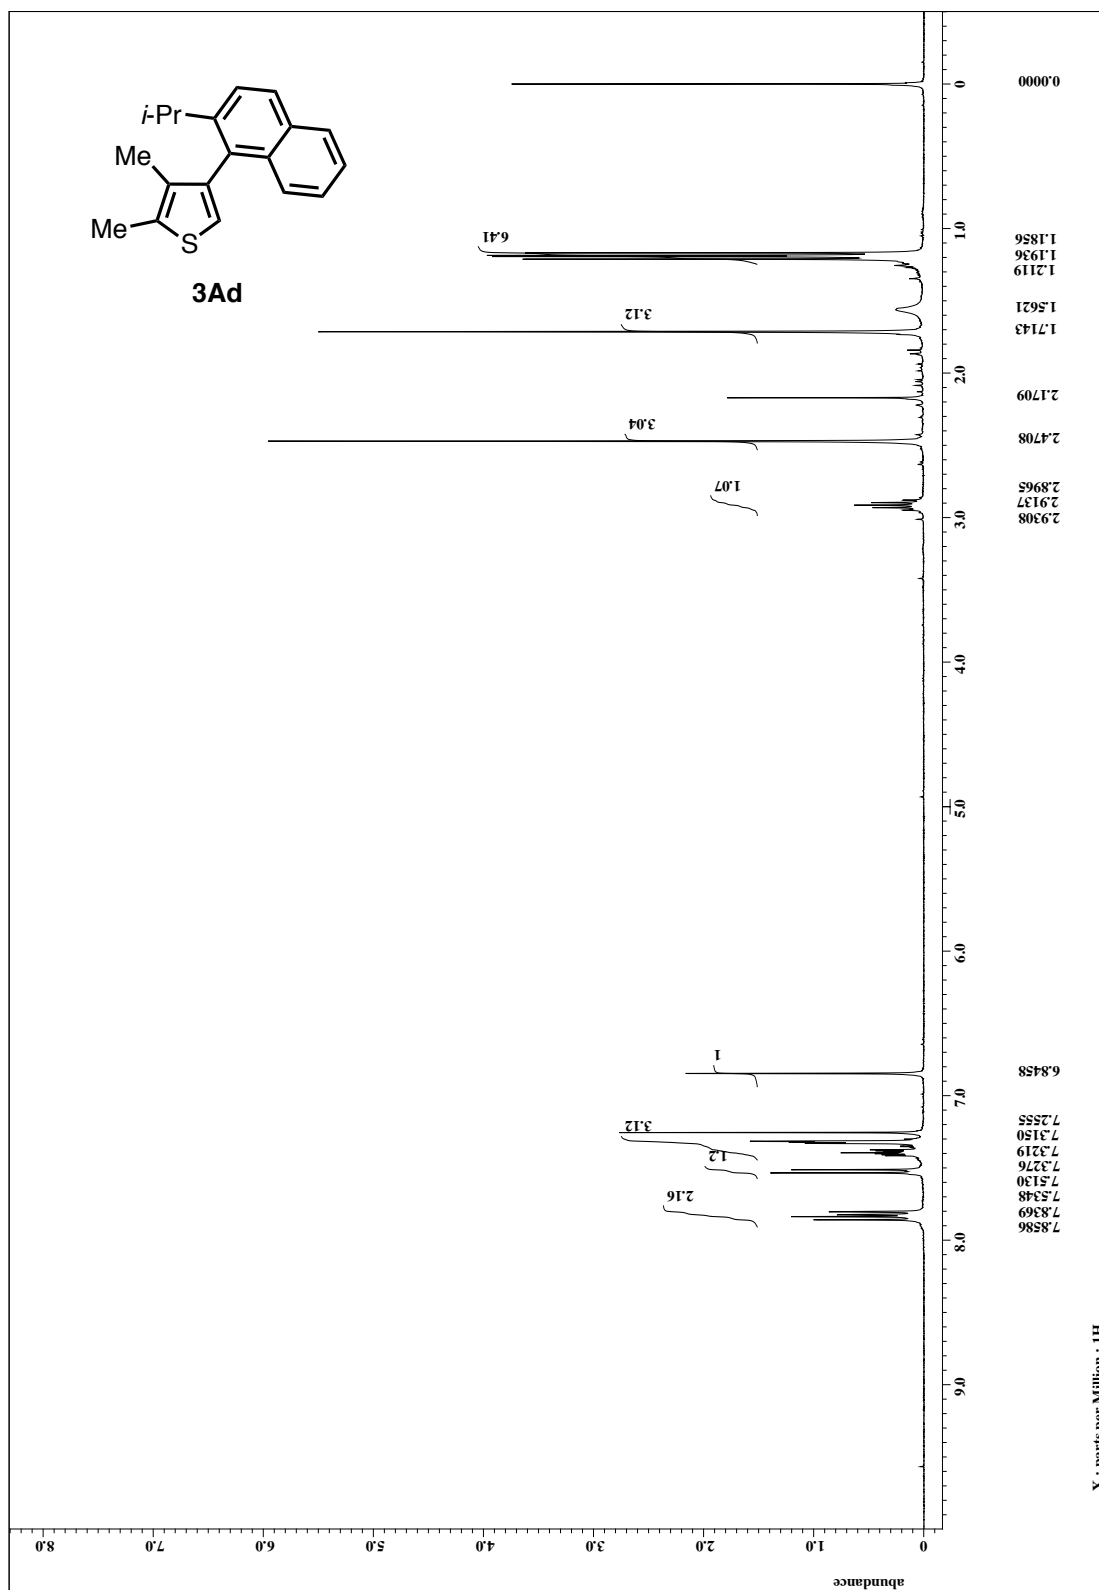

Supplementary Information (Yamaguchi, Kondo, Yamaguchi, Itami)  
Aromatic C–H Coupling with Hindered Arylboronic Acids by Pd/Fe Dual Catalysts

$^1\text{H}$  NMR (400 MHz,  $\text{CDCl}_3$ ) of **3Ba**:

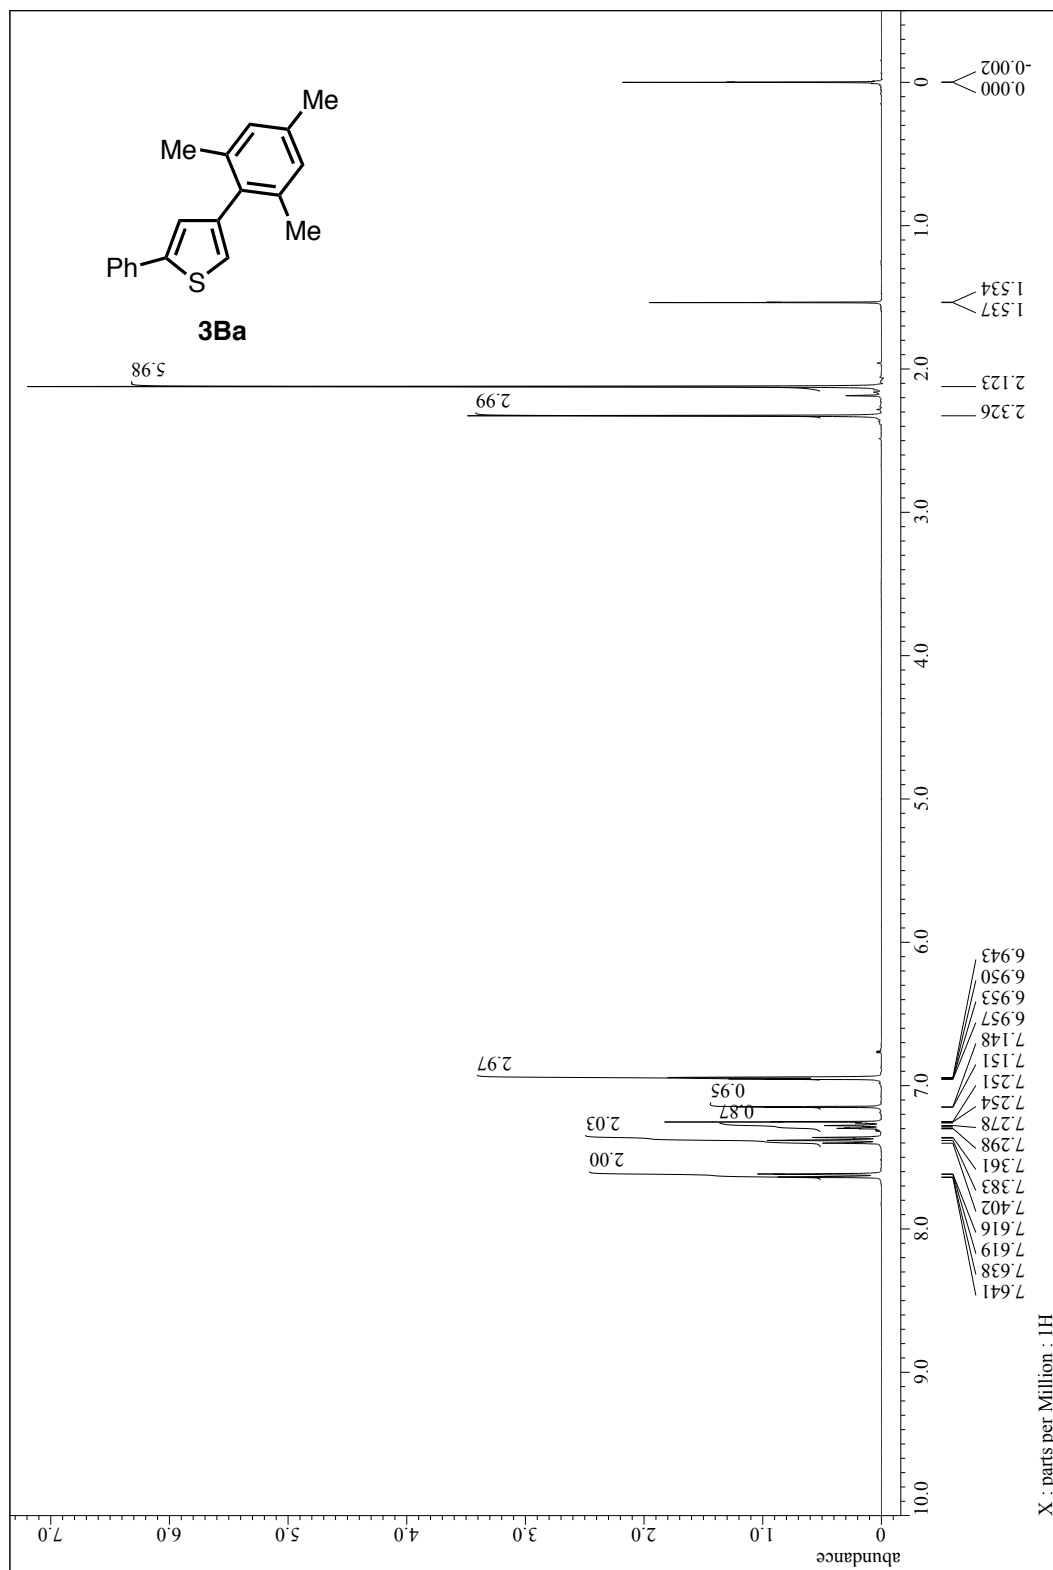

Supplementary Information (Yamaguchi, Kondo, Yamaguchi, Itami)  
Aromatic C–H Coupling with Hindered Arylboronic Acids by Pd/Fe Dual Catalysts

$^{13}\text{C}$  NMR (100 MHz,  $\text{CDCl}_3$ ) of 3Ba:

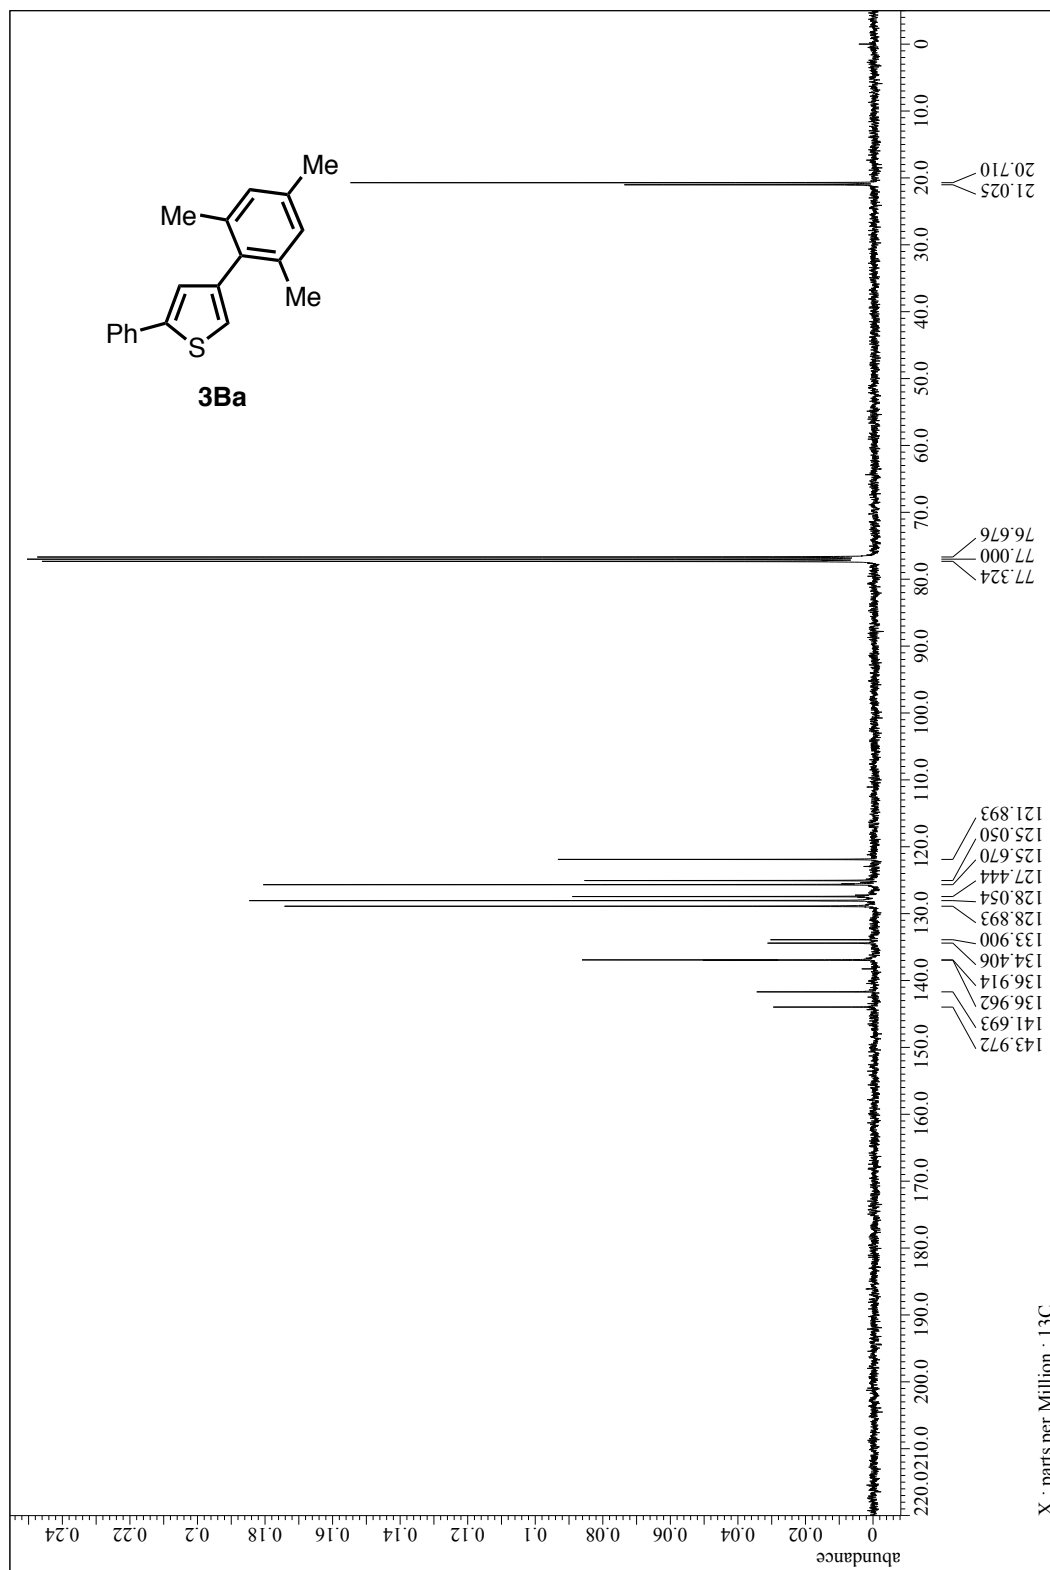

Supplementary Information (Yamaguchi, Kondo, Yamaguchi, Itami)  
Aromatic C–H Coupling with Hindered Arylboronic Acids by Pd/Fe Dual Catalysts

$^1\text{H}$  NMR (400 MHz,  $\text{CDCl}_3$ ) of 3Cb:

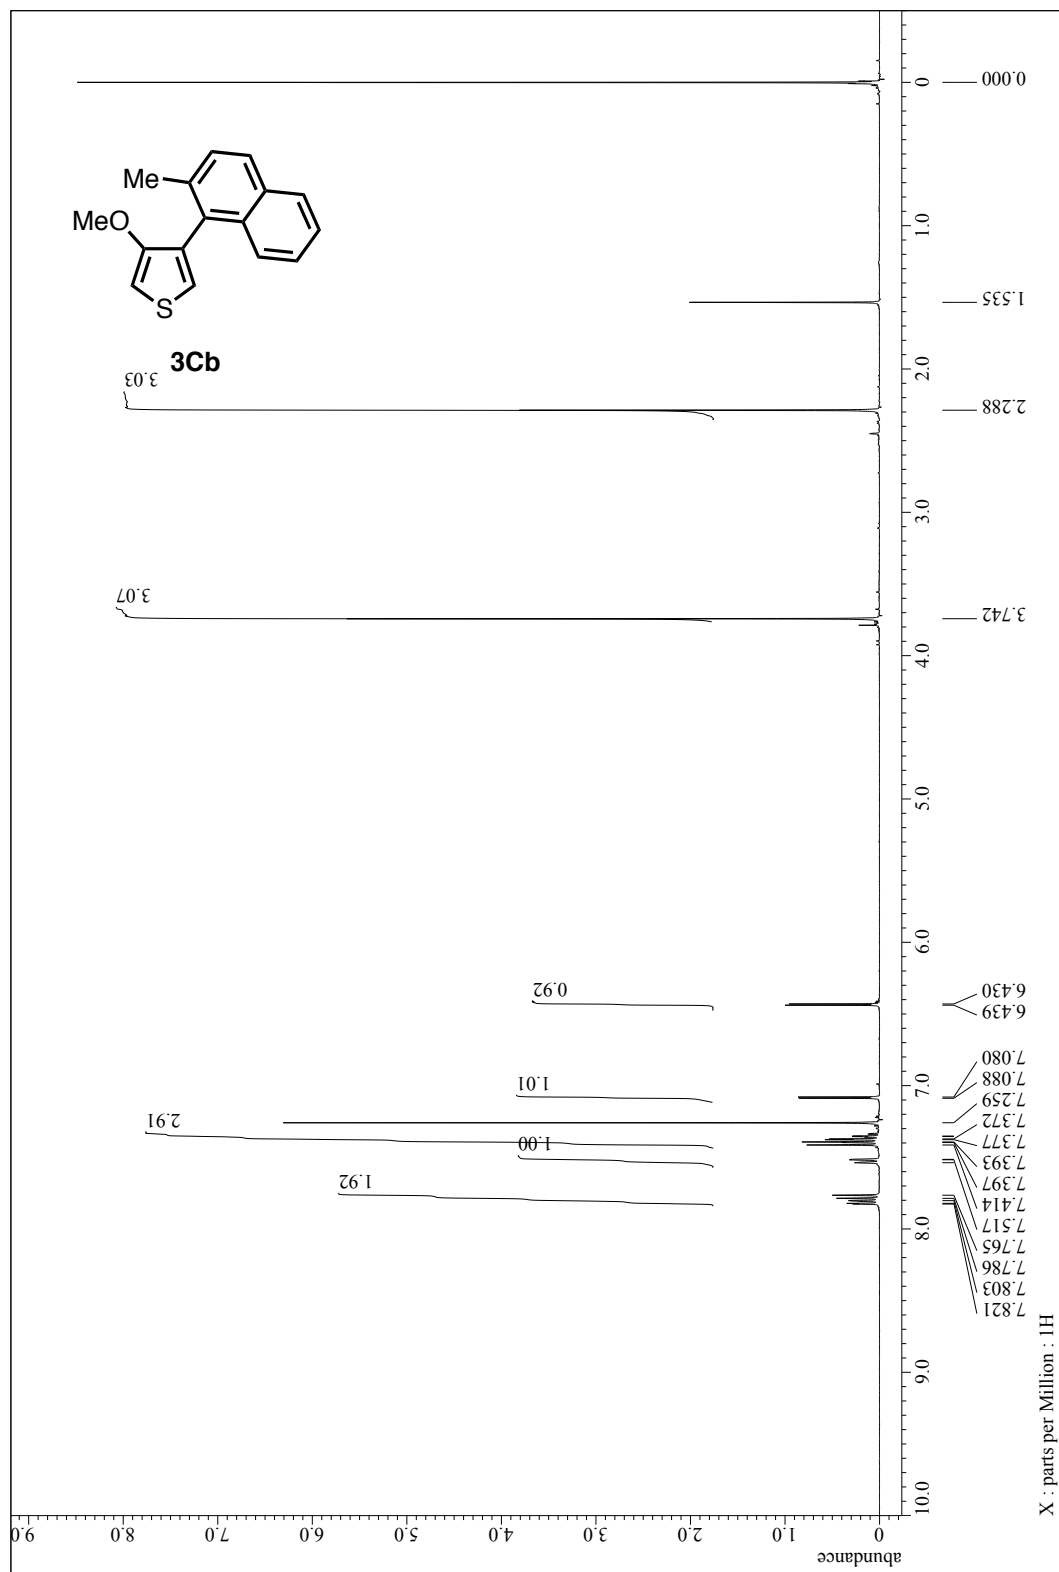



Supplementary Information (Yamaguchi, Kondo, Yamaguchi, Itami)  
Aromatic C–H Coupling with Hindered Arylboronic Acids by Pd/Fe Dual Catalysts

$^{13}\text{C}$  NMR (100 MHz,  $\text{CDCl}_3$ ) of 3Cb:

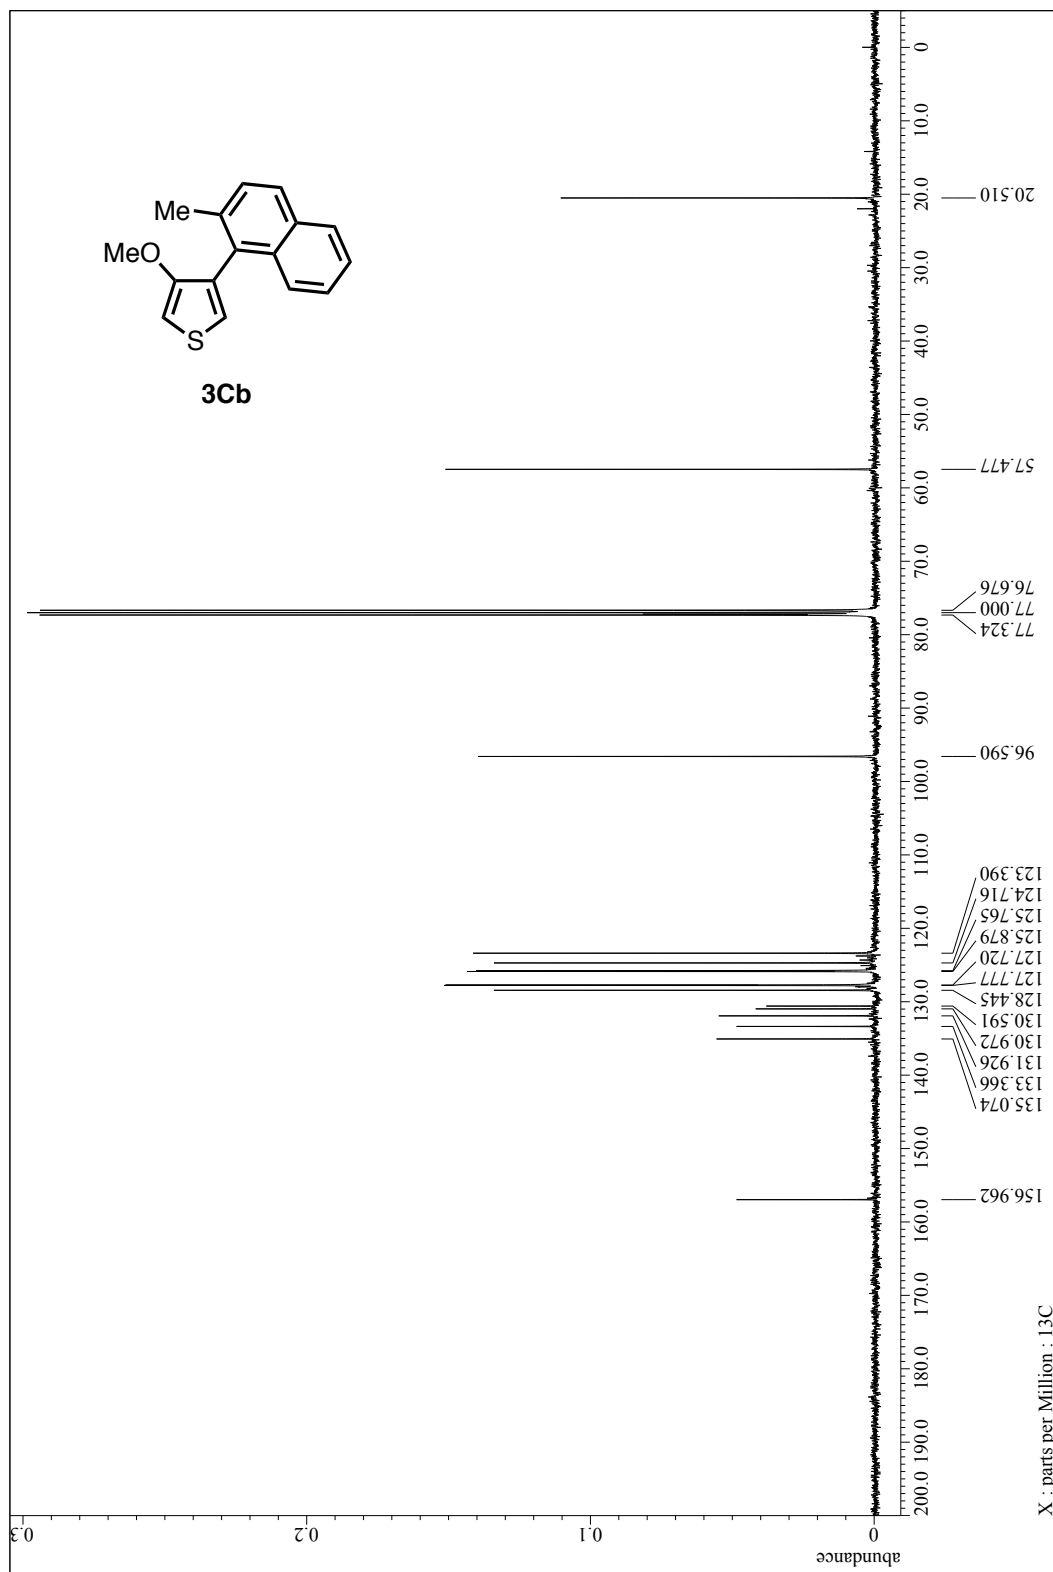

Supplementary Information (Yamaguchi, Kondo, Yamaguchi, Itami)  
Aromatic C–H Coupling with Hindered Arylboronic Acids by Pd/Fe Dual Catalysts

$^1\text{H}$  NMR (400 MHz,  $\text{CDCl}_3$ ) of **3Db**:

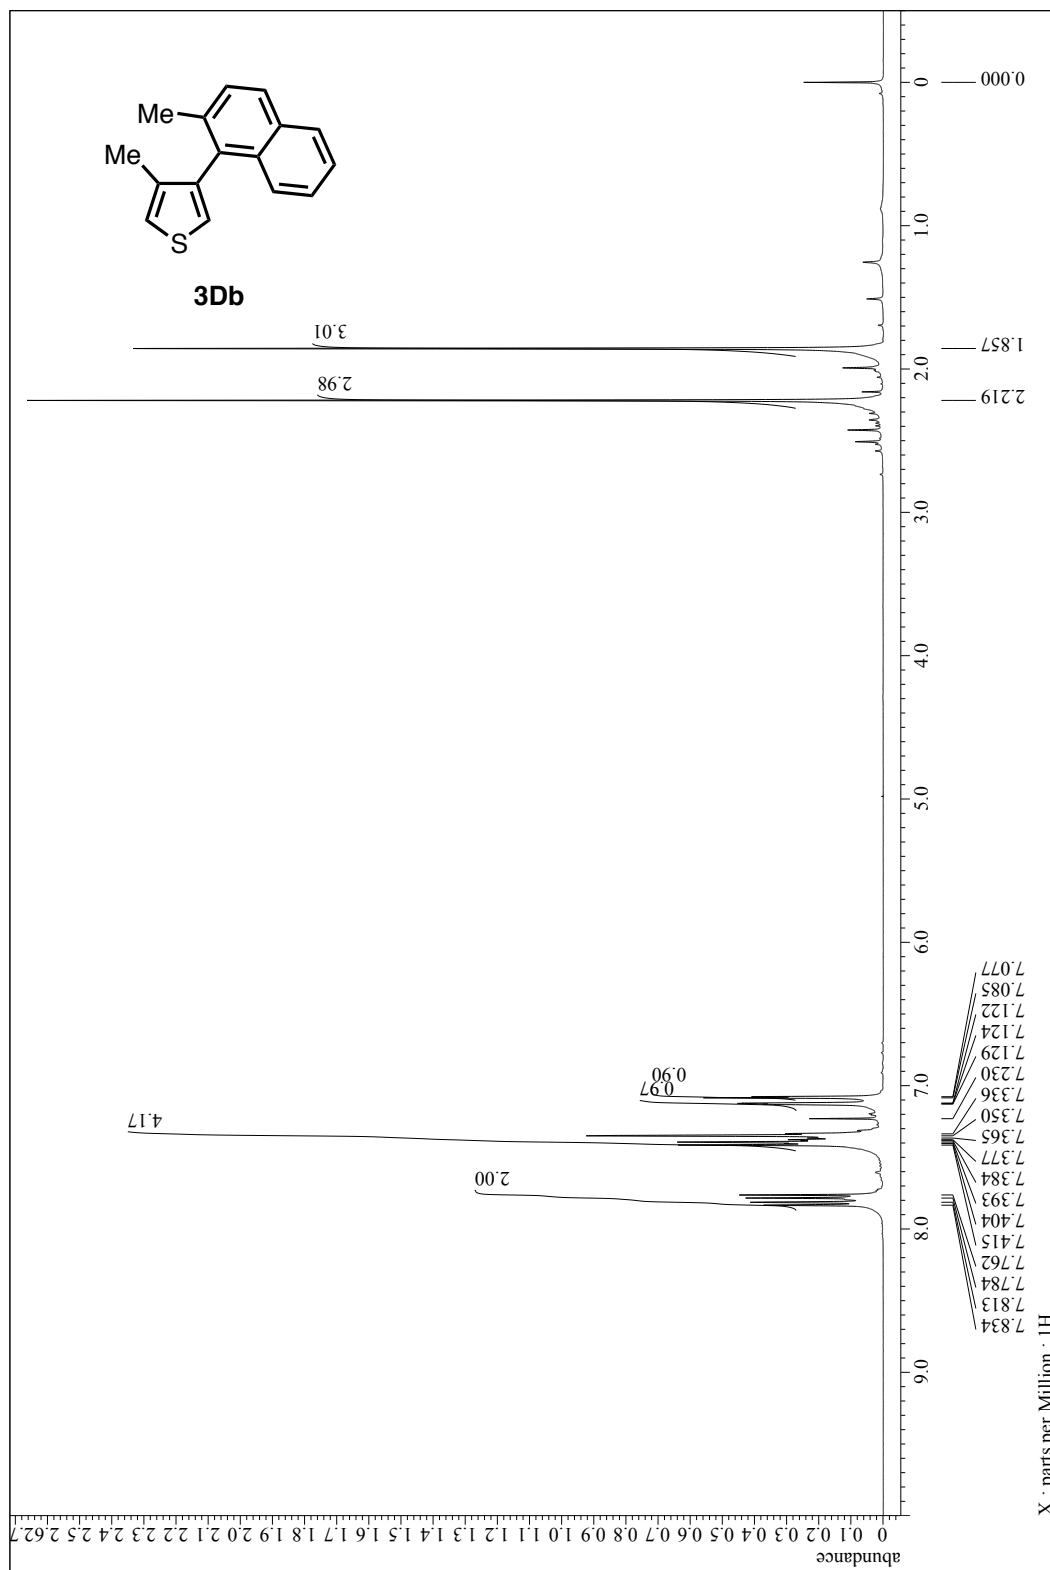

Supplementary Information (Yamaguchi, Kondo, Yamaguchi, Itami)  
Aromatic C–H Coupling with Hindered Arylboronic Acids by Pd/Fe Dual Catalysts

$^1\text{H}$  NMR (400 MHz,  $\text{CDCl}_3$ ) of 3Ea:

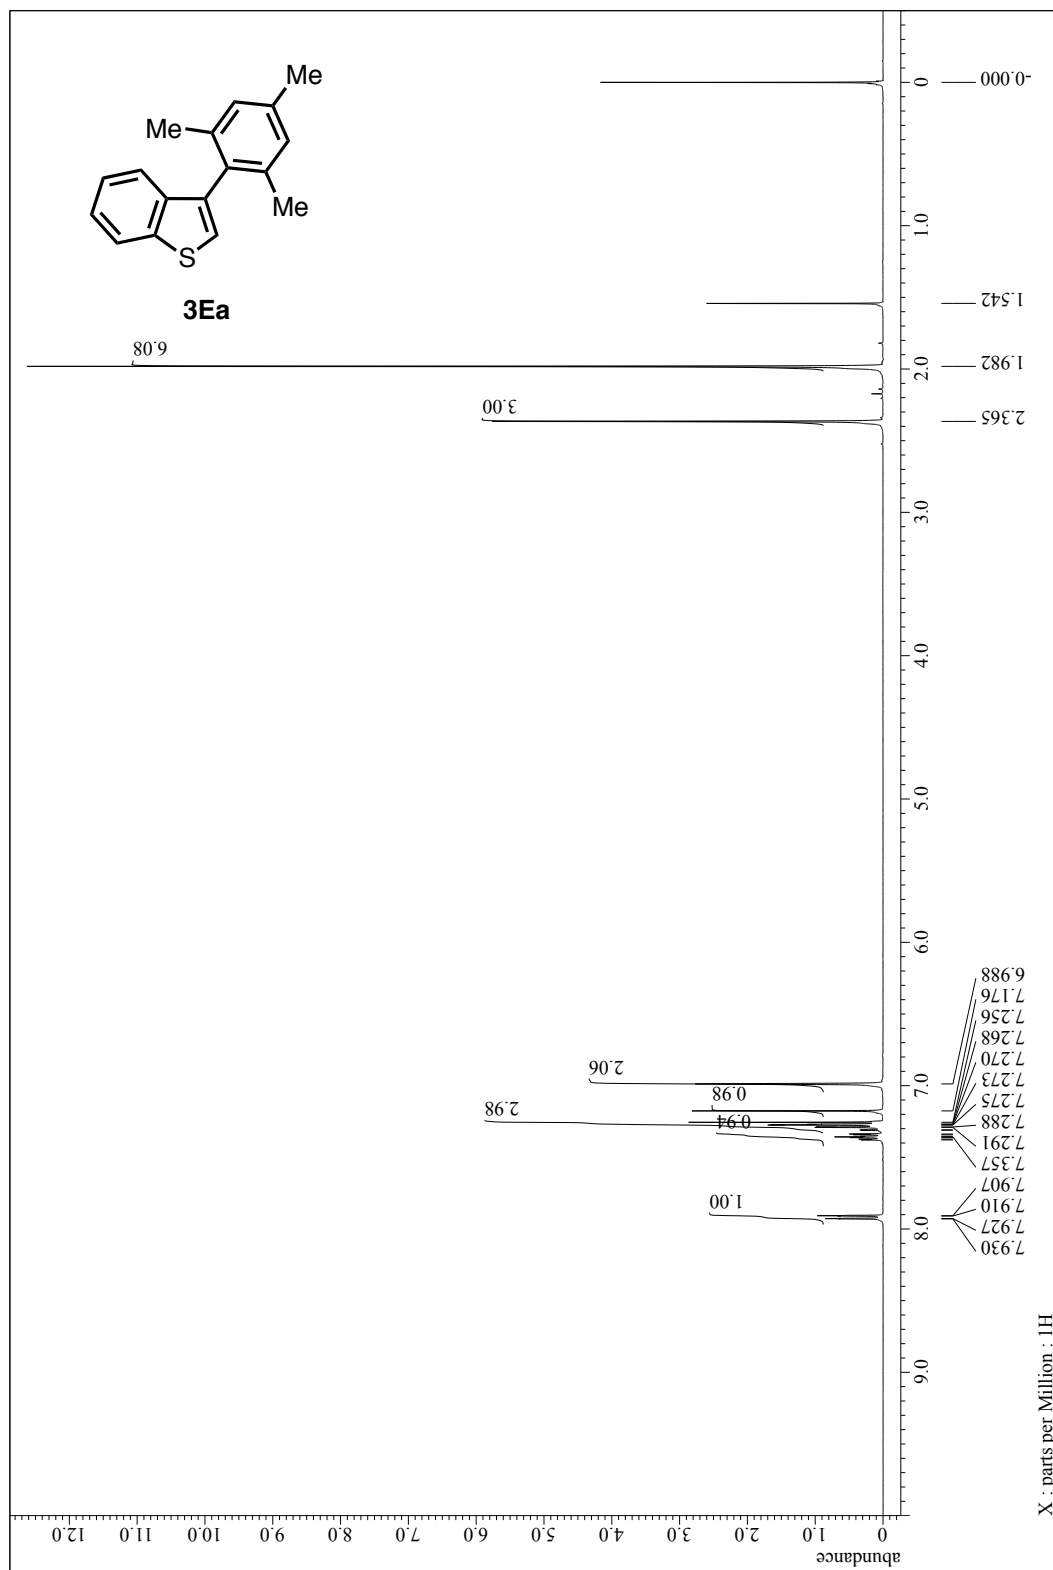

Supplementary Information (Yamaguchi, Kondo, Yamaguchi, Itami)  
Aromatic C–H Coupling with Hindered Arylboronic Acids by Pd/Fe Dual Catalysts

$^{13}\text{C}$  NMR (100 MHz,  $\text{CDCl}_3$ ) of 3Ea:

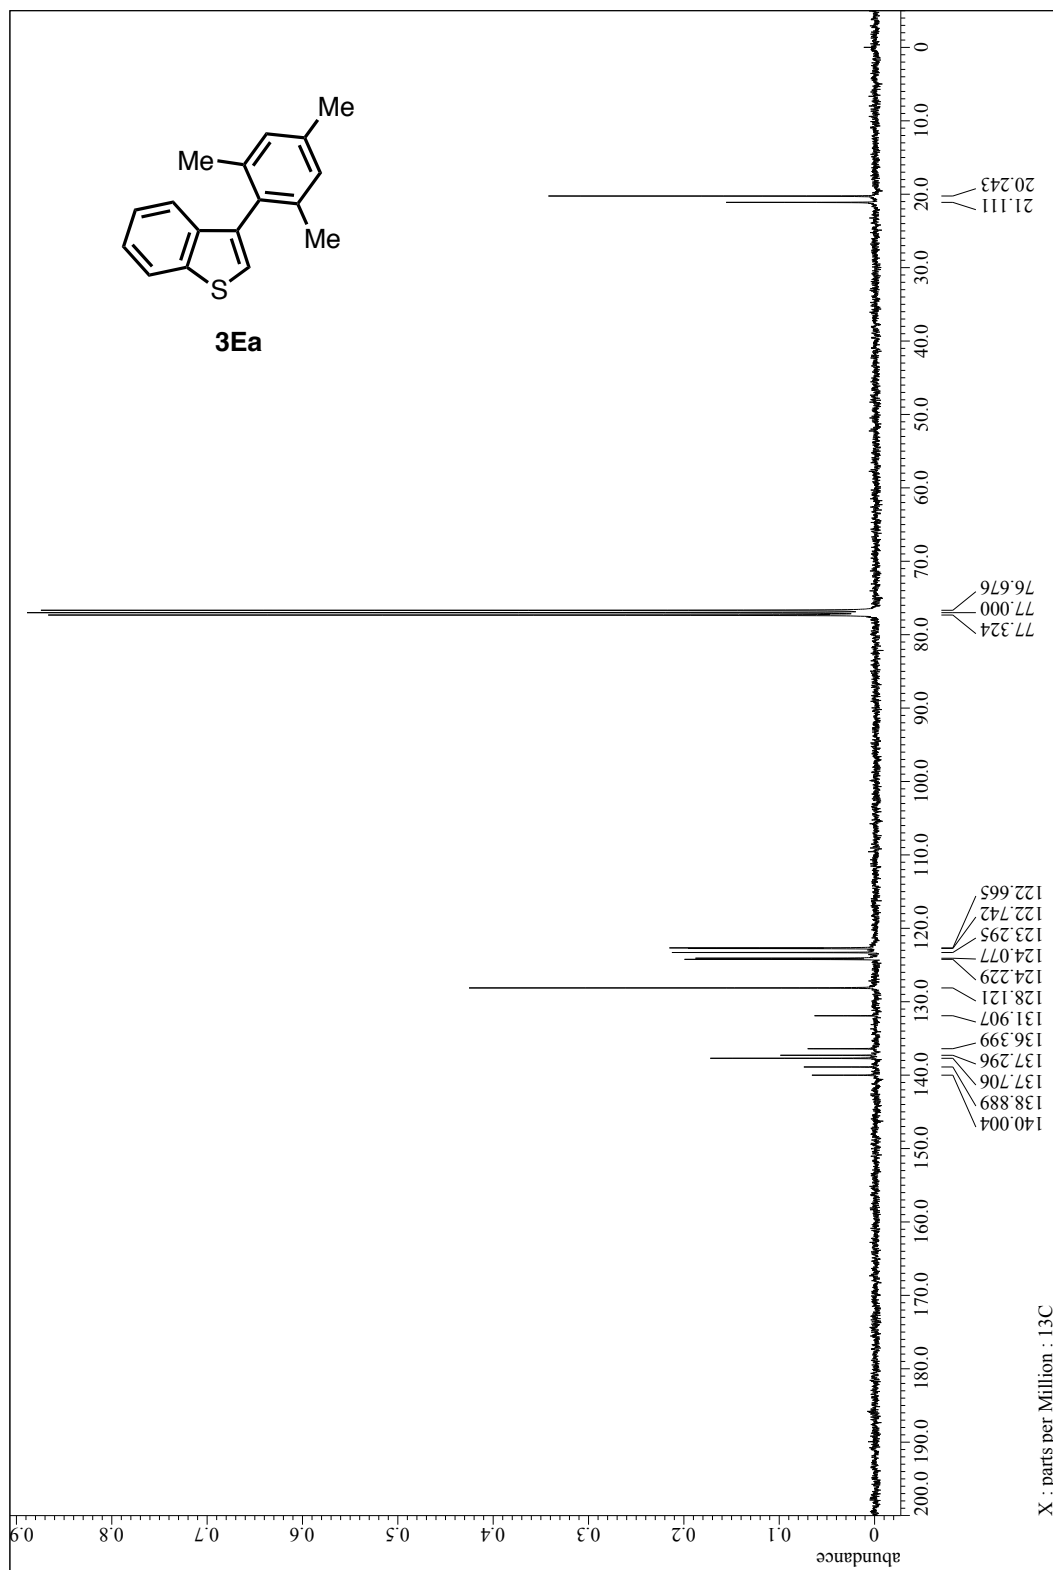

Supplementary Information (Yamaguchi, Kondo, Yamaguchi, Itami)  
Aromatic C–H Coupling with Hindered Arylboronic Acids by Pd/Fe Dual Catalysts

$^1\text{H}$  NMR (400 MHz,  $\text{CDCl}_3$ ) of 3Eb:

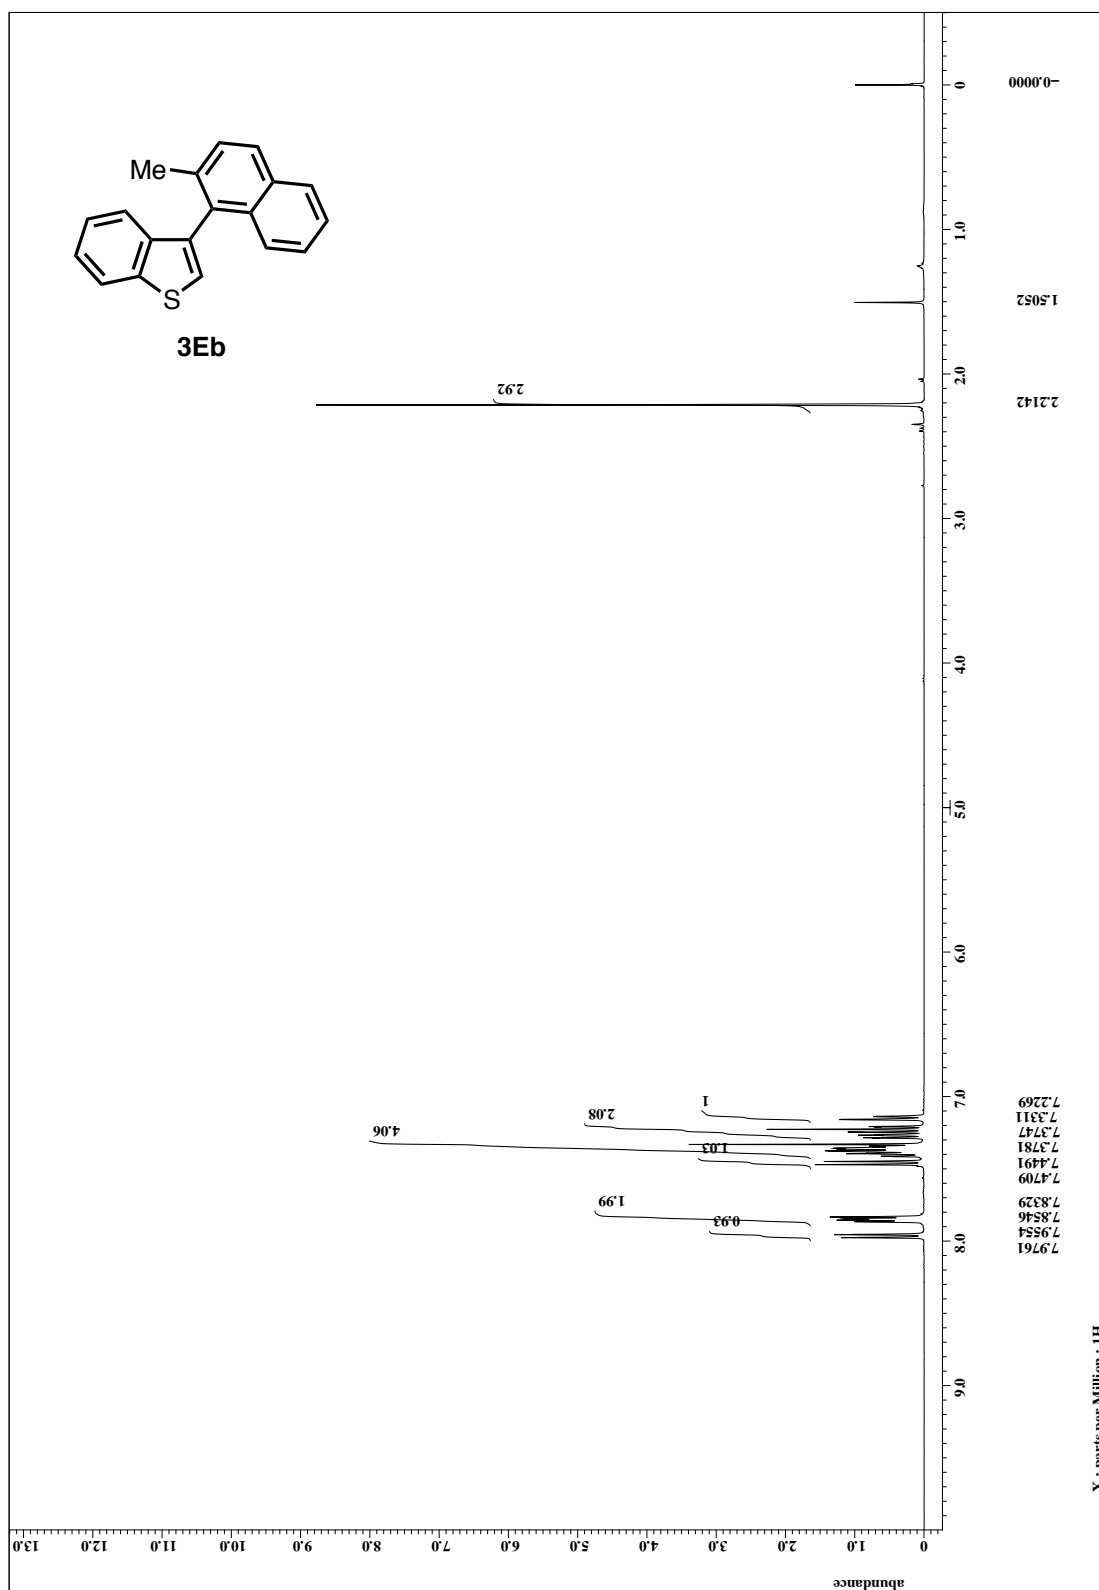

Supplementary Information (Yamaguchi, Kondo, Yamaguchi, Itami)  
Aromatic C–H Coupling with Hindered Arylboronic Acids by Pd/Fe Dual Catalysts

$^1\text{H}$  NMR (400 MHz,  $\text{CDCl}_3$ ) of **3Fa**:

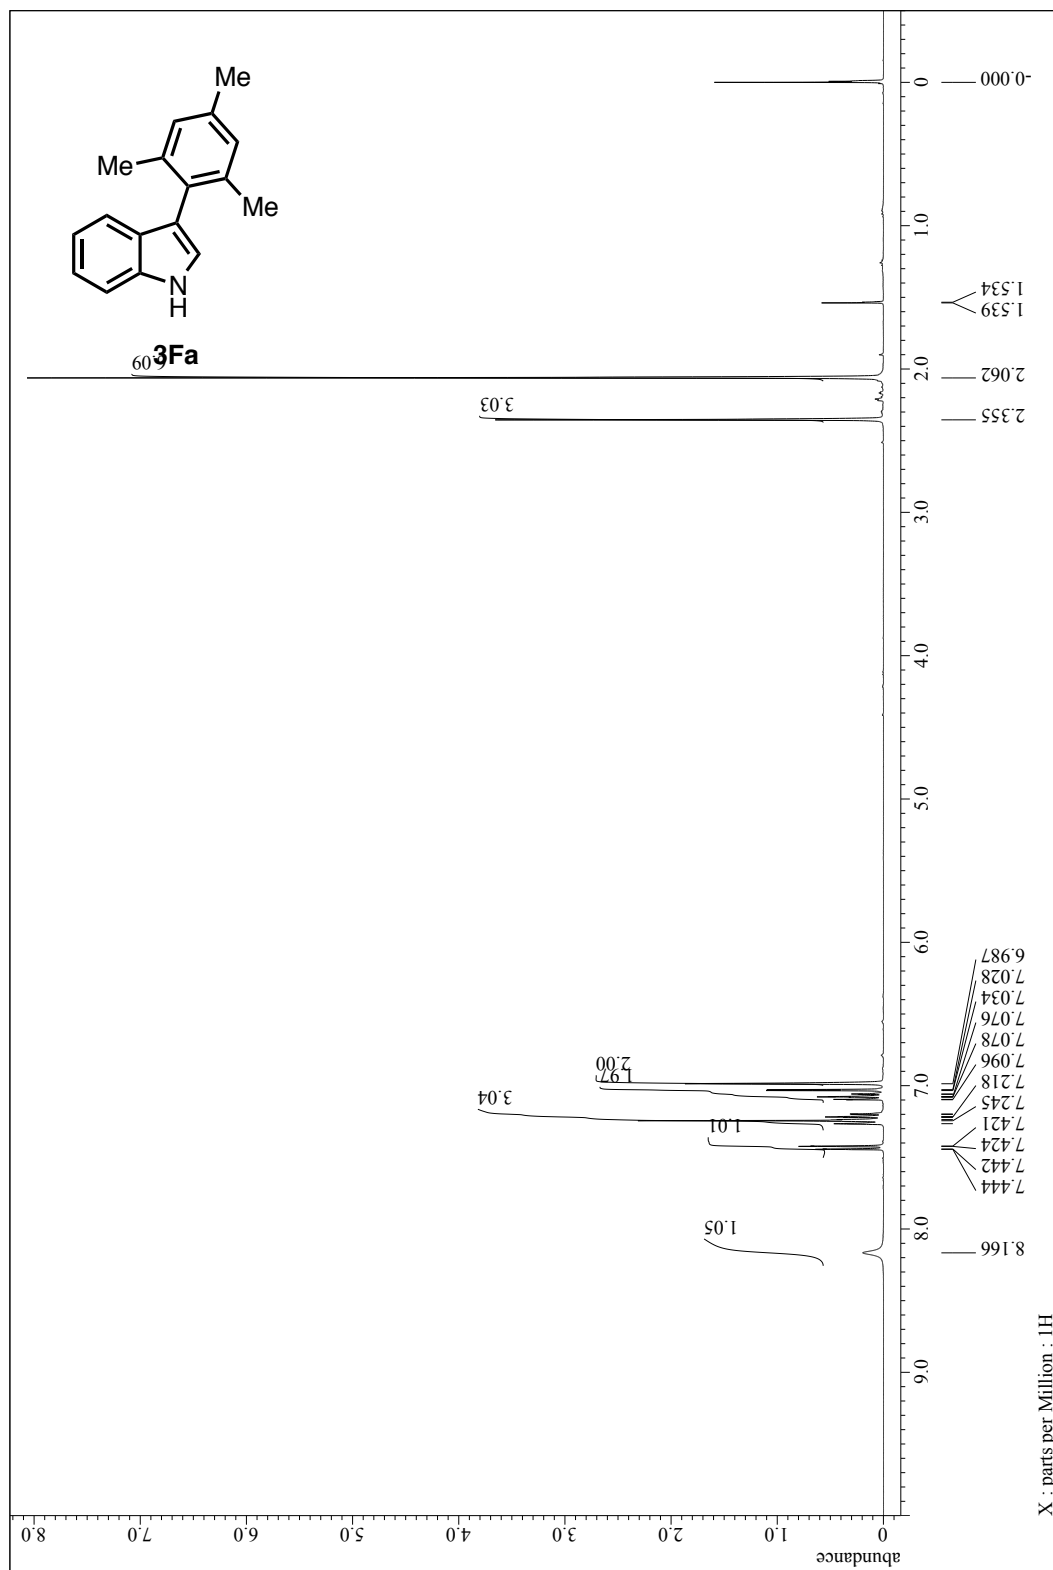

Supplementary Information (Yamaguchi, Kondo, Yamaguchi, Itami)  
Aromatic C–H Coupling with Hindered Arylboronic Acids by Pd/Fe Dual Catalysts

$^{13}\text{C}$  NMR (100 MHz,  $\text{CDCl}_3$ ) of 3Fa:

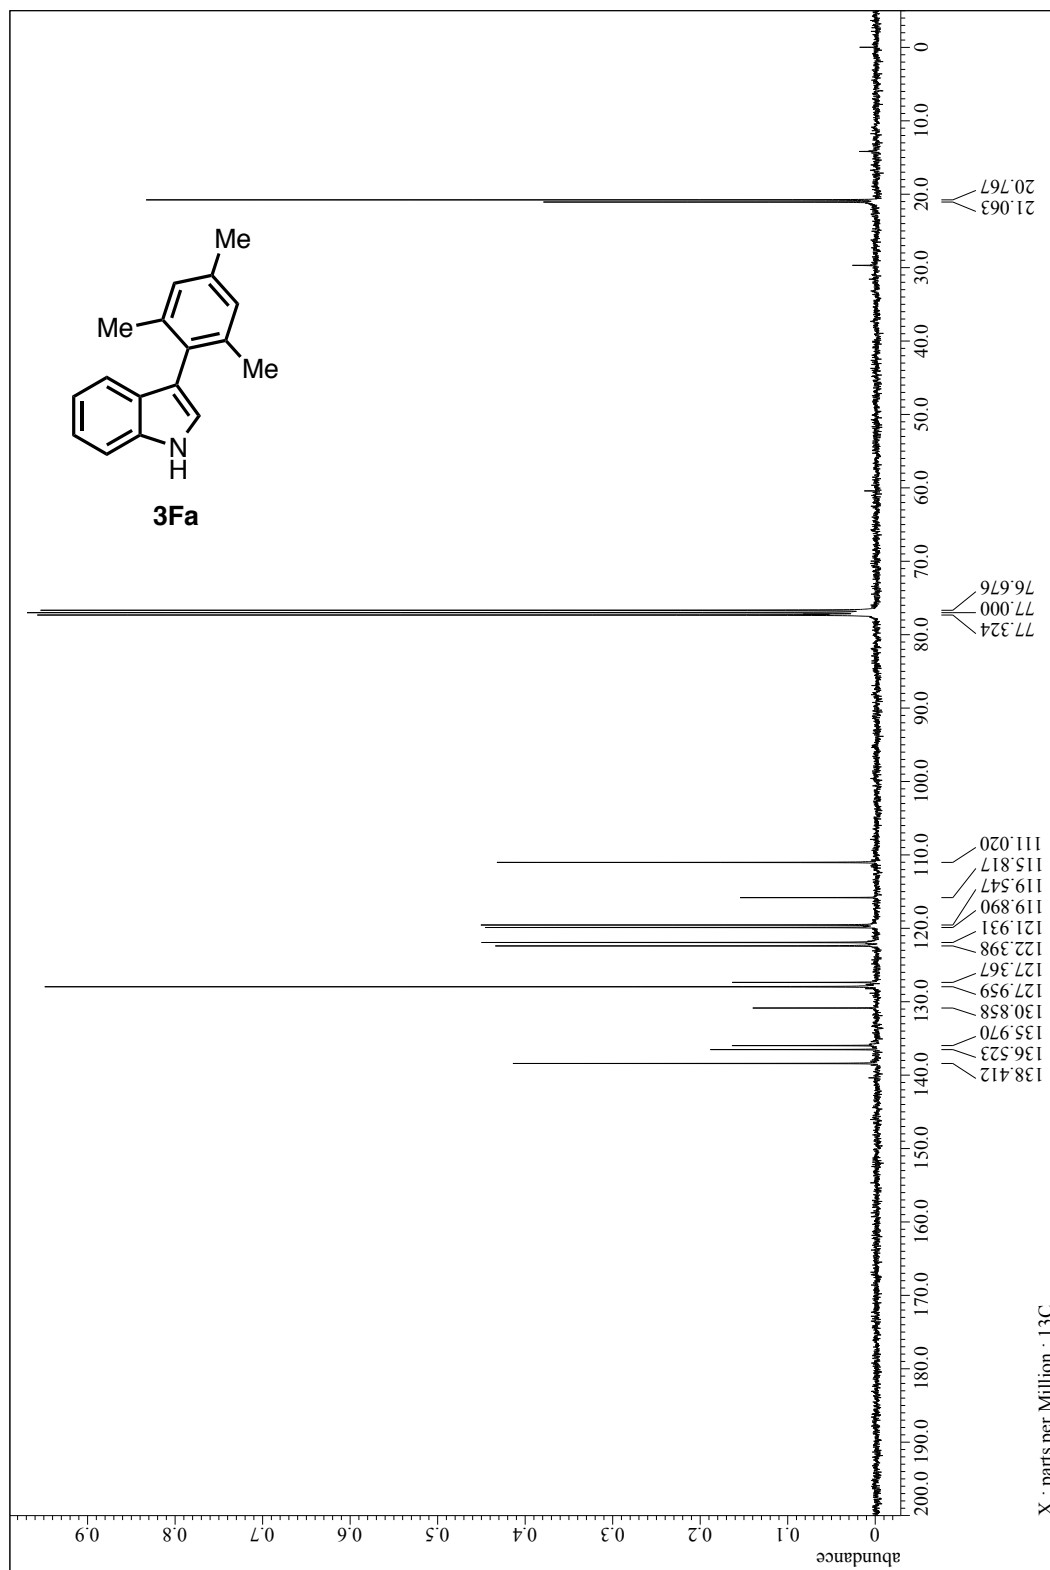

Supplementary Information (Yamaguchi, Kondo, Yamaguchi, Itami)  
Aromatic C–H Coupling with Hindered Arylboronic Acids by Pd/Fe Dual Catalysts

$^1\text{H}$  NMR (400 MHz,  $\text{CDCl}_3$ ) of 3Ga:

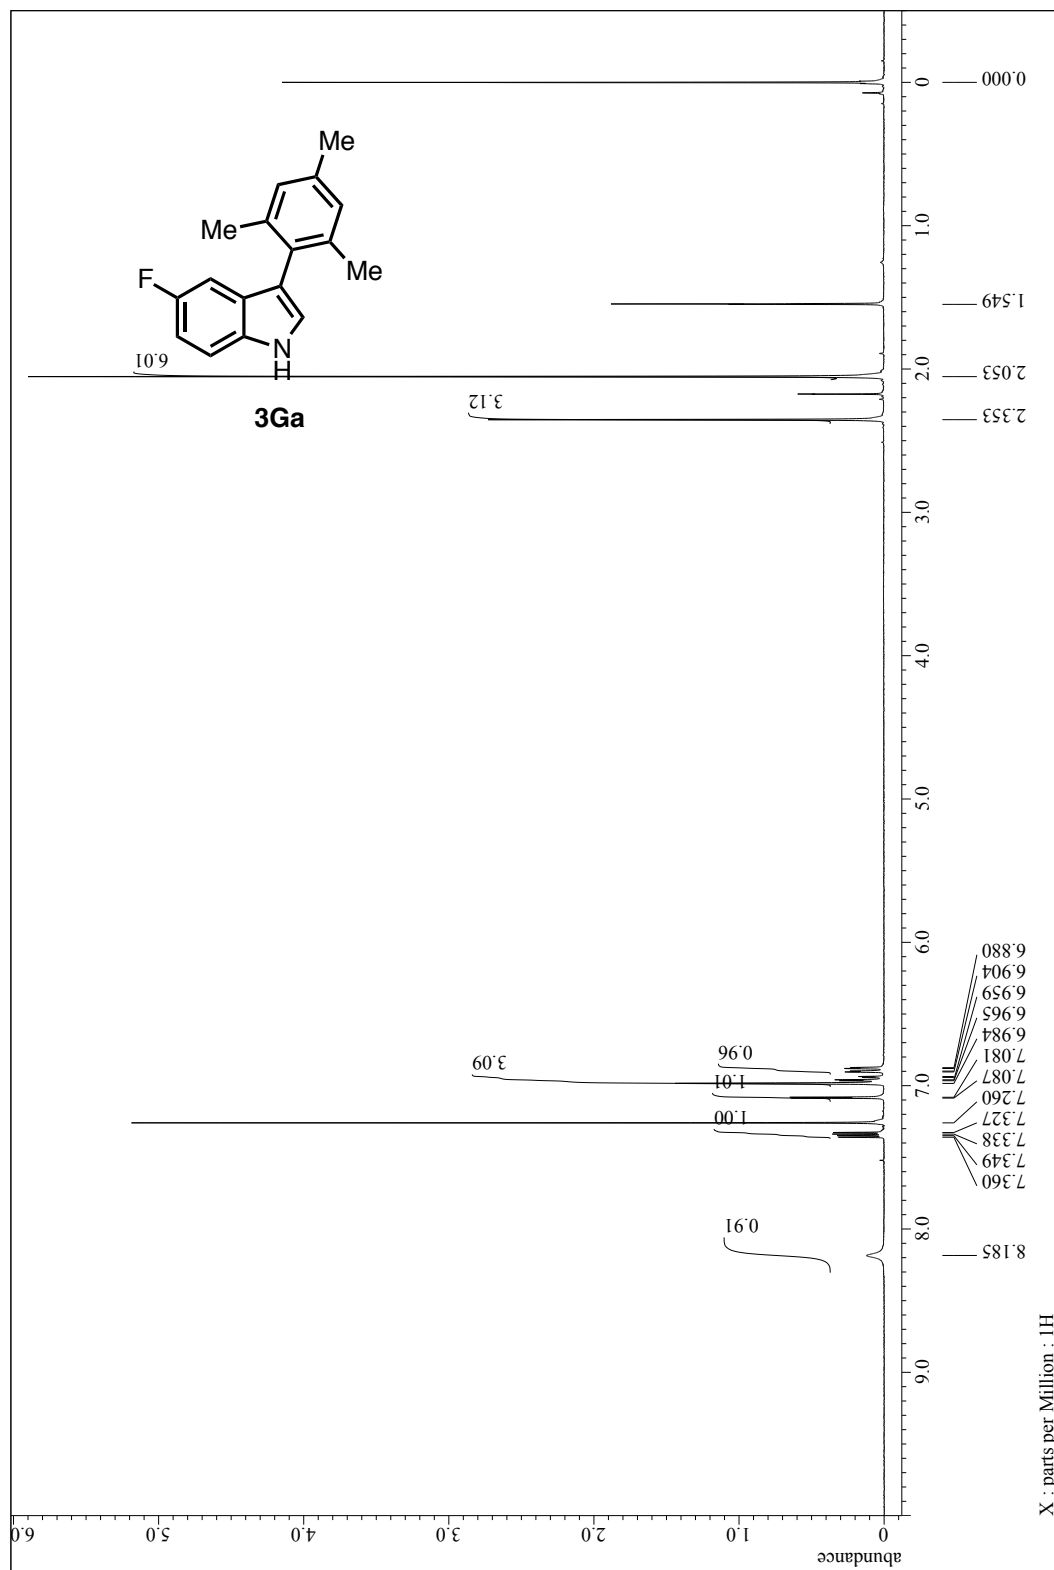



Supplementary Information (Yamaguchi, Kondo, Yamaguchi, Itami)  
Aromatic C–H Coupling with Hindered Arylboronic Acids by Pd/Fe Dual Catalysts

$^{13}\text{C}$  NMR (100 MHz,  $\text{CDCl}_3$ ) of 3Ga:

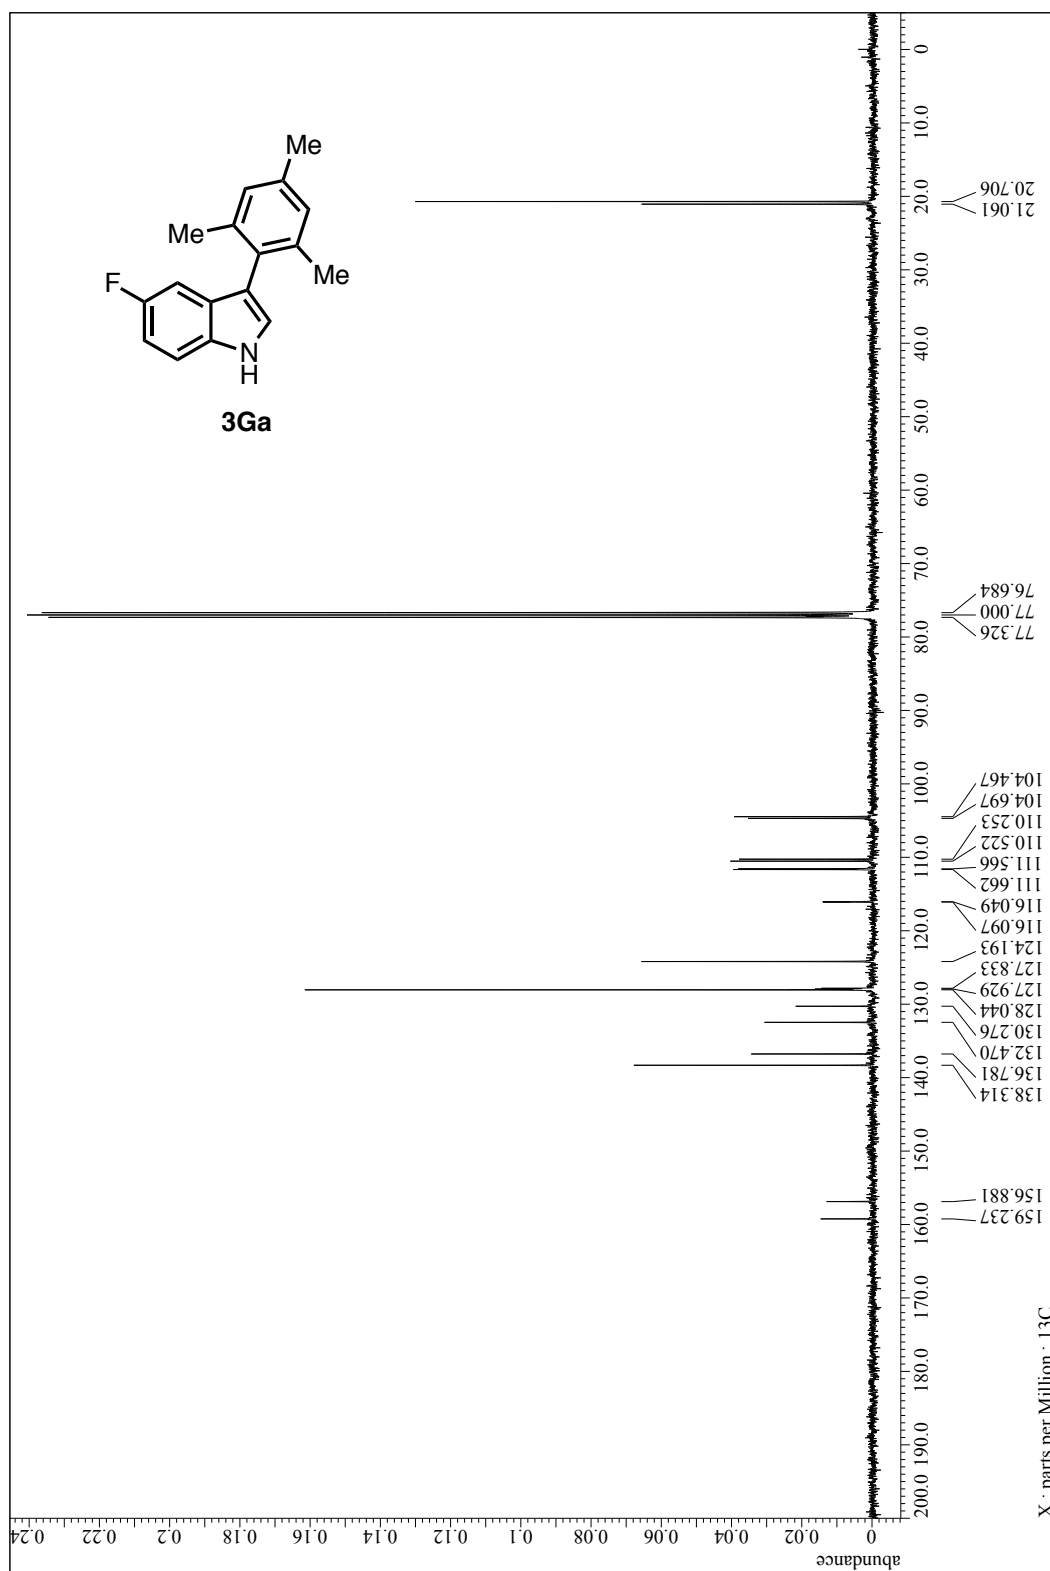



Supplementary Information (Yamaguchi, Kondo, Yamaguchi, Itami)  
Aromatic C–H Coupling with Hindered Arylboronic Acids by Pd/Fe Dual Catalysts

$^{13}\text{C}$  NMR (150 MHz,  $\text{CDCl}_3$ ) of 3Ha:

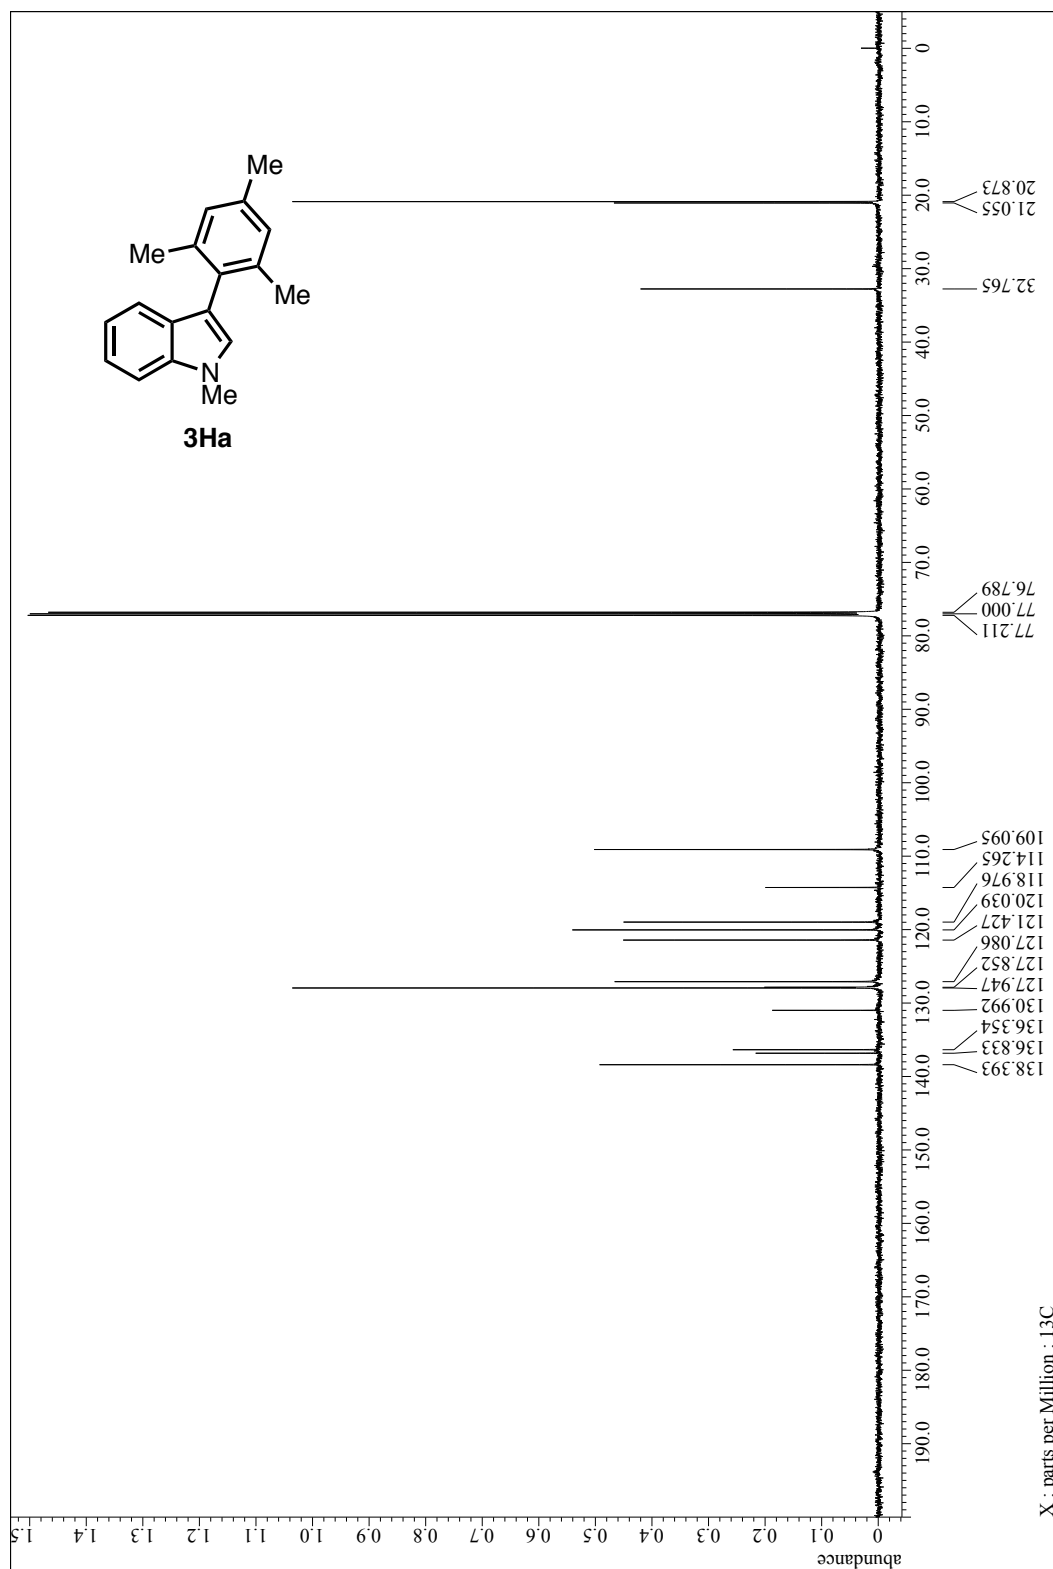



Supplementary Information (Yamaguchi, Kondo, Yamaguchi, Itami)  
Aromatic C–H Coupling with Hindered Arylboronic Acids by Pd/Fe Dual Catalysts

$^{13}\text{C}$  NMR (100 MHz,  $\text{CDCl}_3$ ) of 3Hb:

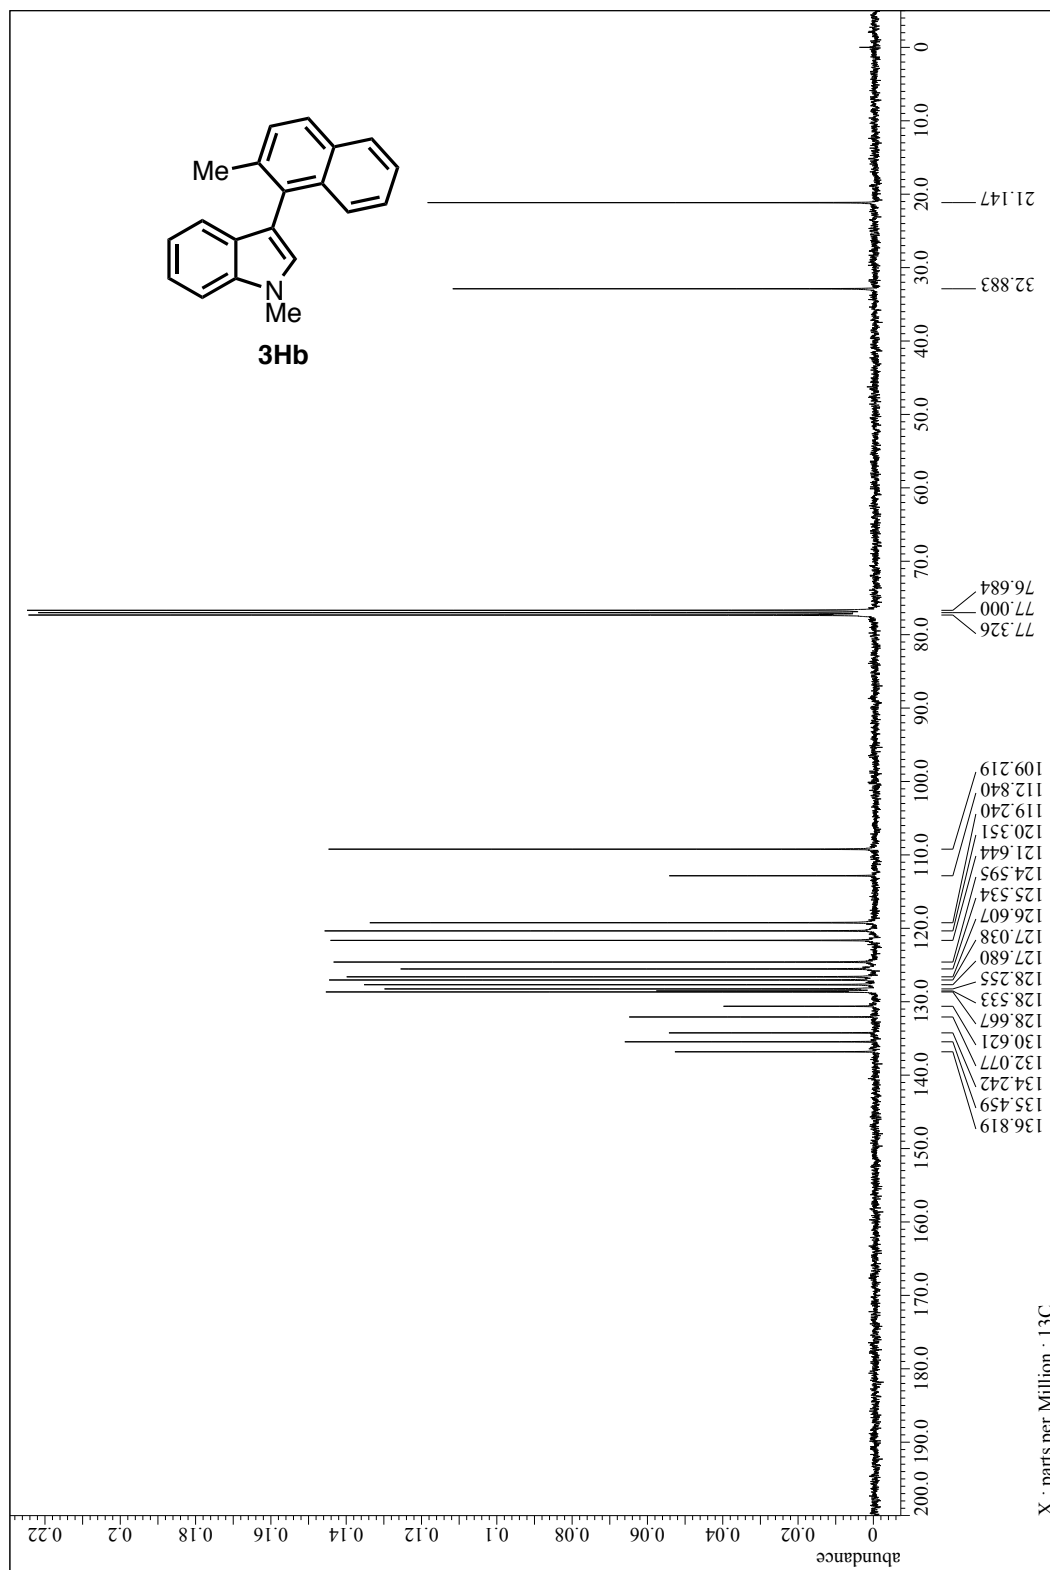

Supplementary Information (Yamaguchi, Kondo, Yamaguchi, Itami)  
Aromatic C–H Coupling with Hindered Arylboronic Acids by Pd/Fe Dual Catalysts

$^1\text{H}$  NMR (400 MHz,  $\text{CDCl}_3$ ) of **3Ia**:

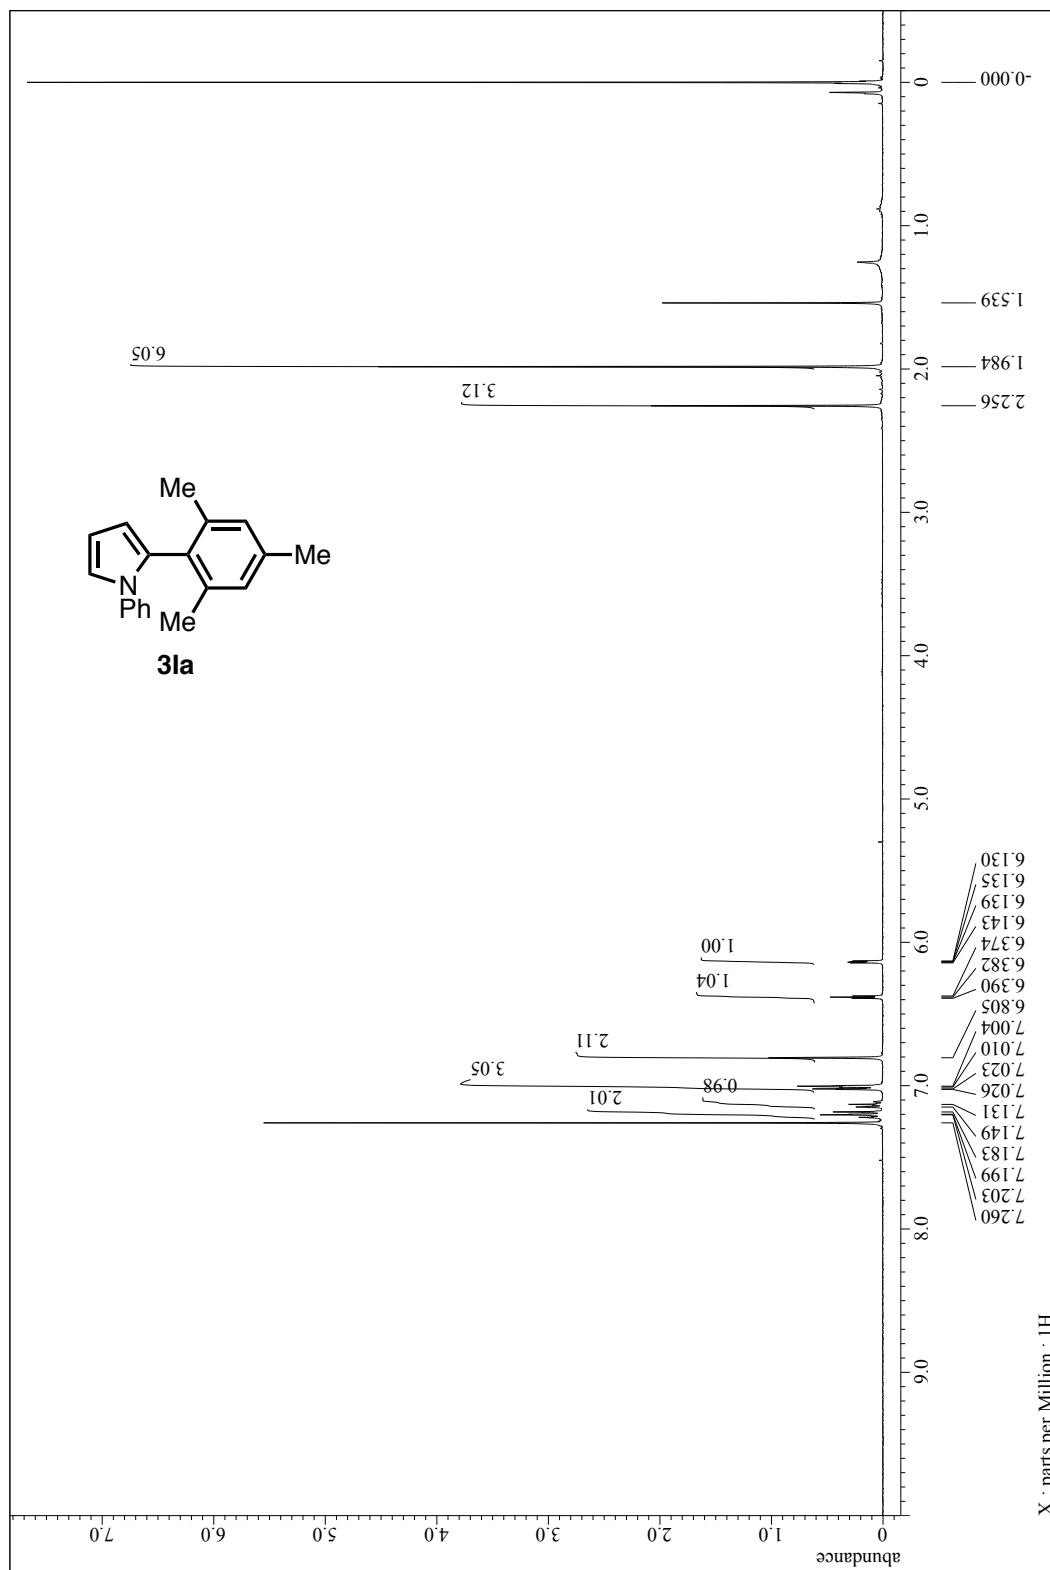

Supplementary Information (Yamaguchi, Kondo, Yamaguchi, Itami)  
Aromatic C–H Coupling with Hindered Arylboronic Acids by Pd/Fe Dual Catalysts

$^{13}\text{C}$  NMR (150 MHz,  $\text{CDCl}_3$ ) of 3Ia:

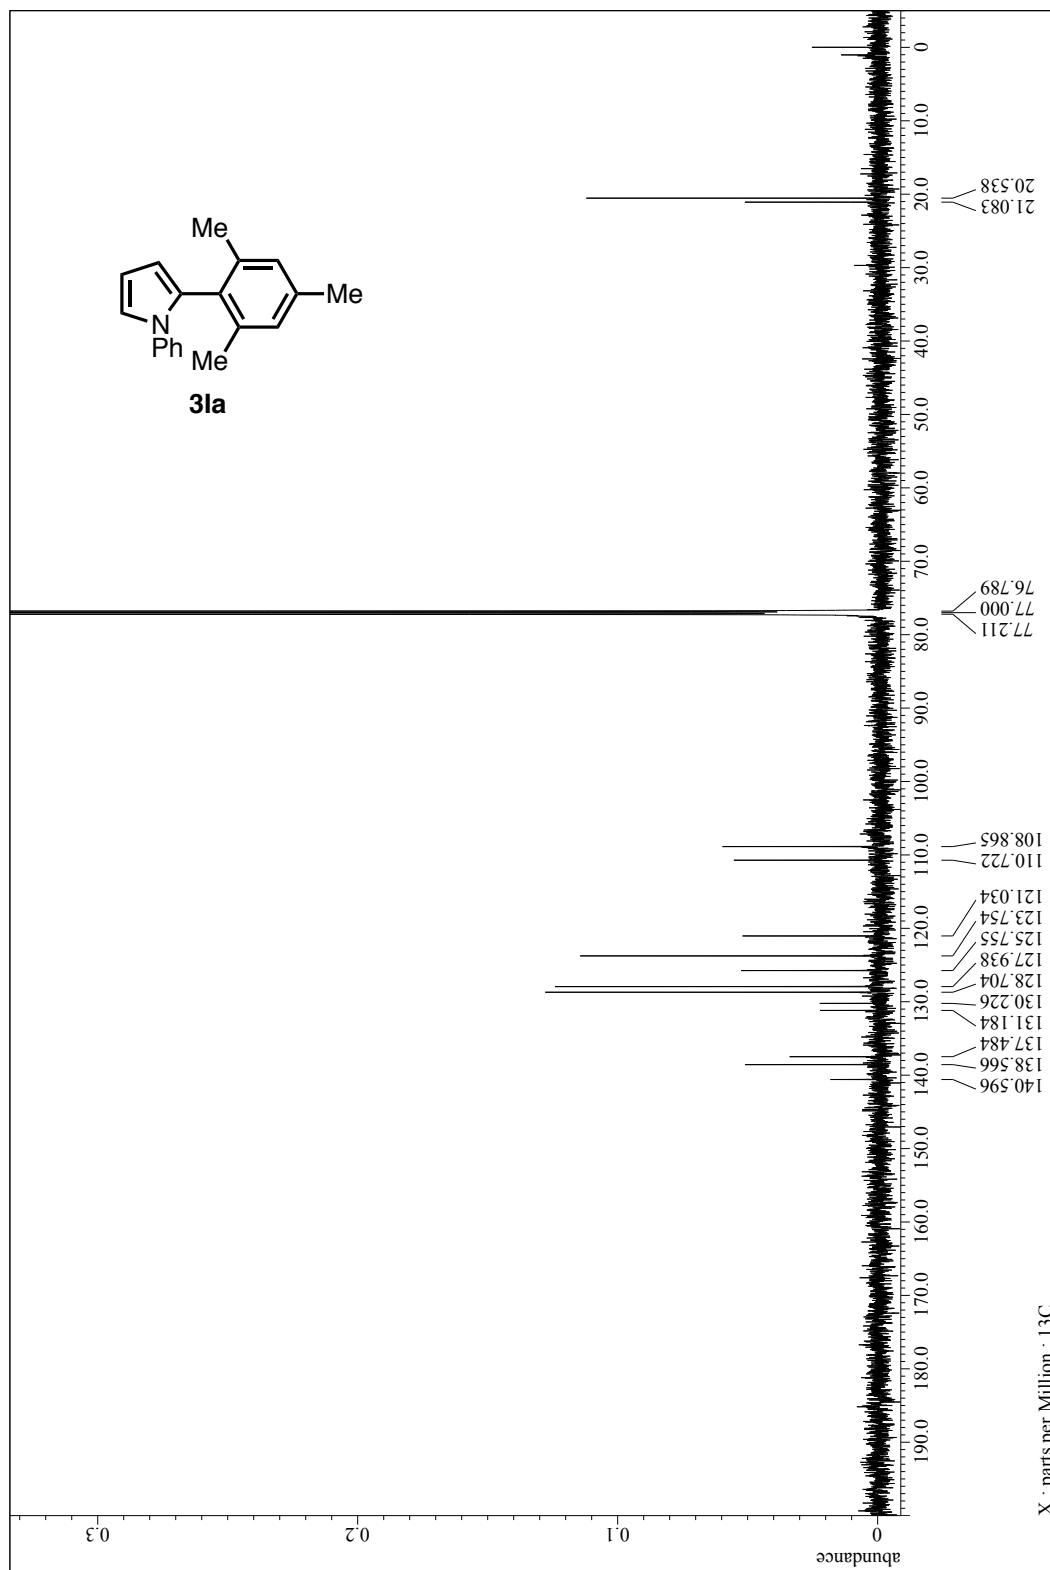

Supplementary Information (Yamaguchi, Kondo, Yamaguchi, Itami)  
Aromatic C–H Coupling with Hindered Arylboronic Acids by Pd/Fe Dual Catalysts

$^1\text{H}$  NMR (400 MHz,  $\text{CDCl}_3$ ) of **3Ib**:

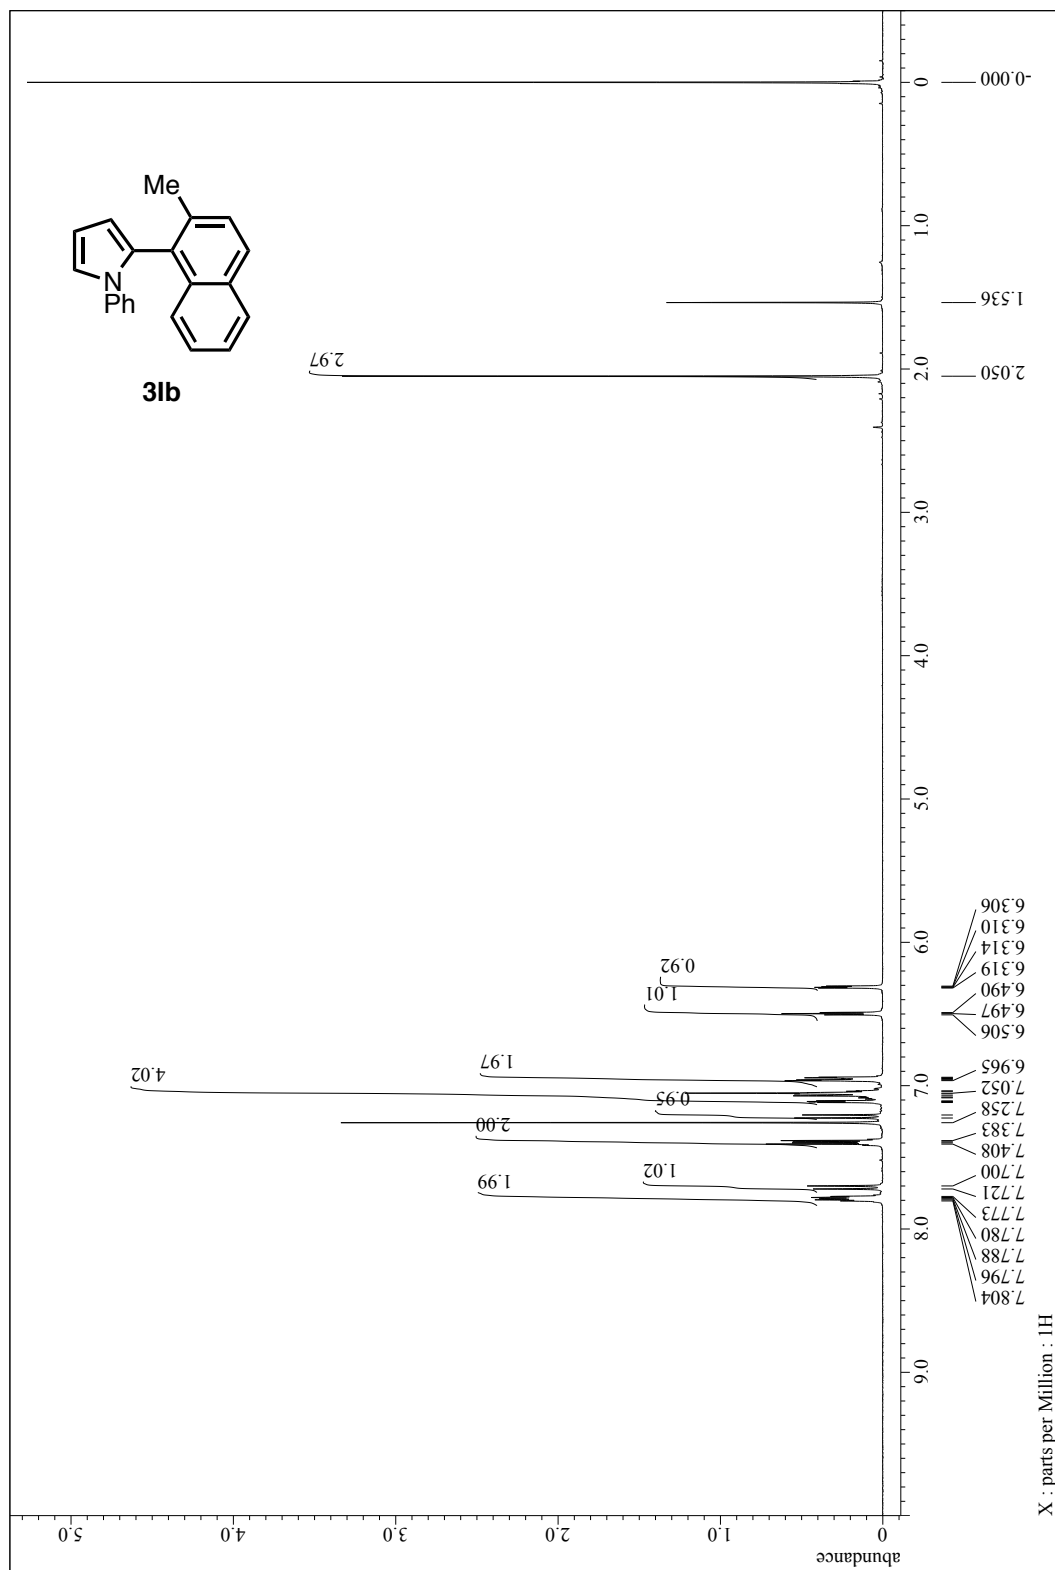



Supplementary Information (Yamaguchi, Kondo, Yamaguchi, Itami)  
Aromatic C–H Coupling with Hindered Arylboronic Acids by Pd/Fe Dual Catalysts

$^{13}\text{C}$  NMR (100 MHz,  $\text{CDCl}_3$ ) of 31b:

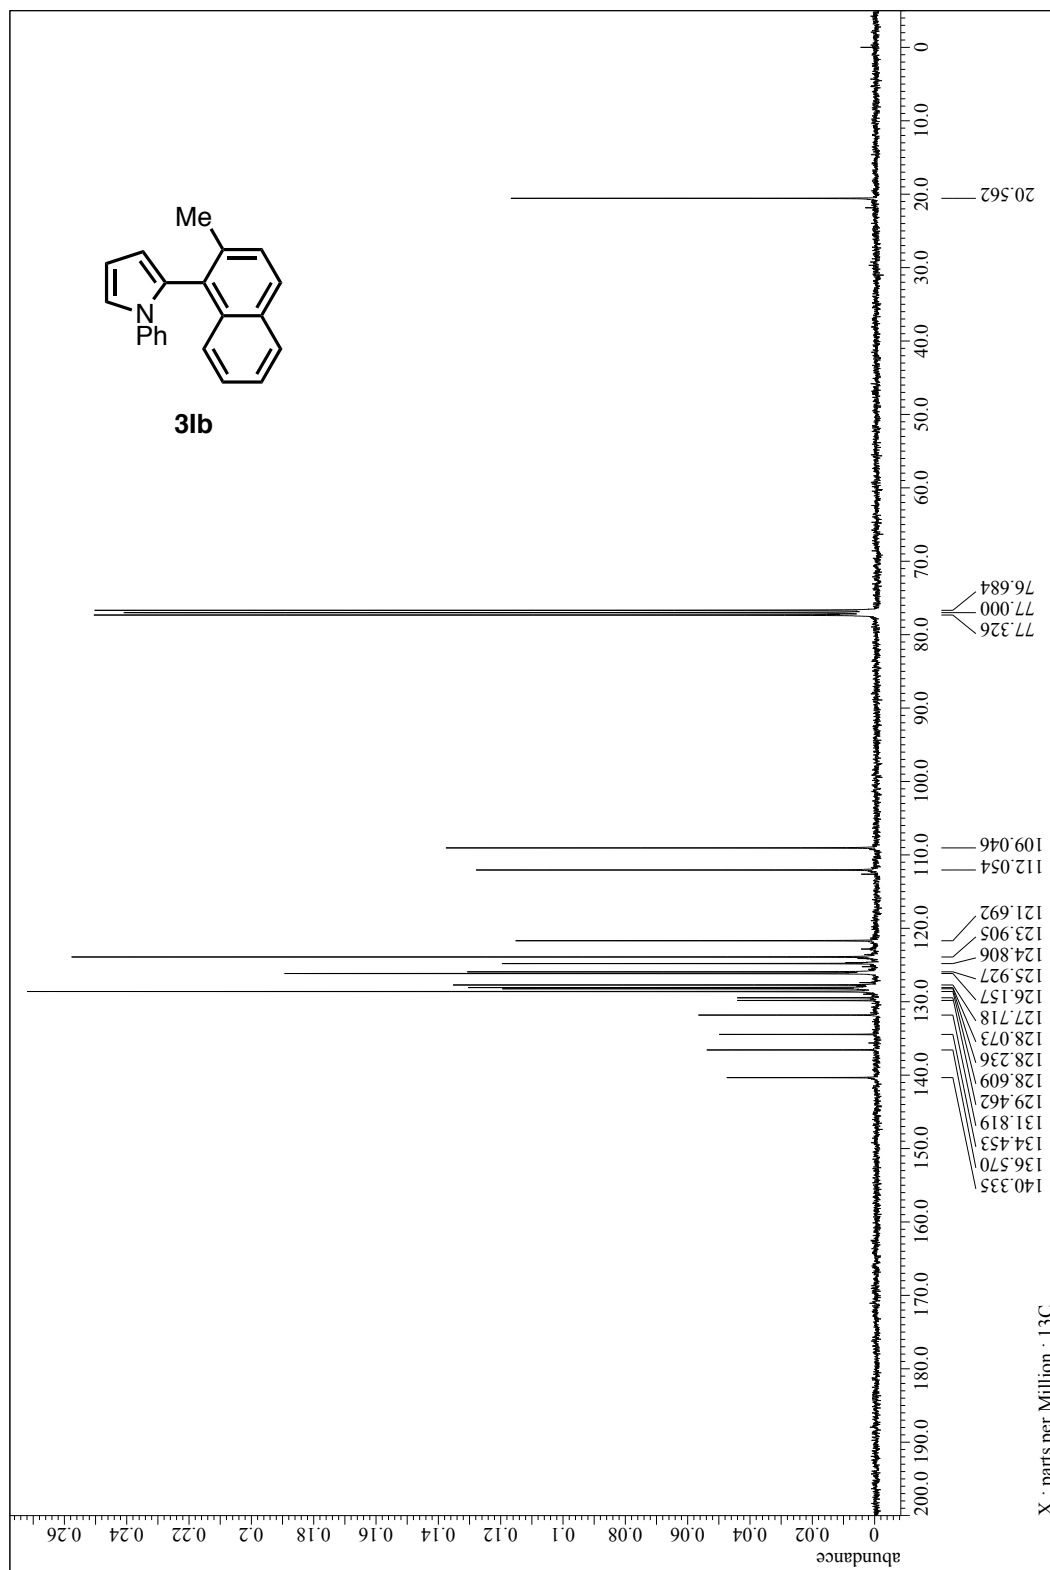

Supplementary Information (Yamaguchi, Kondo, Yamaguchi, Itami)  
Aromatic C–H Coupling with Hindered Arylboronic Acids by Pd/Fe Dual Catalysts

$^1\text{H}$  NMR (400 MHz,  $\text{CDCl}_3$ ) of 3Jb:

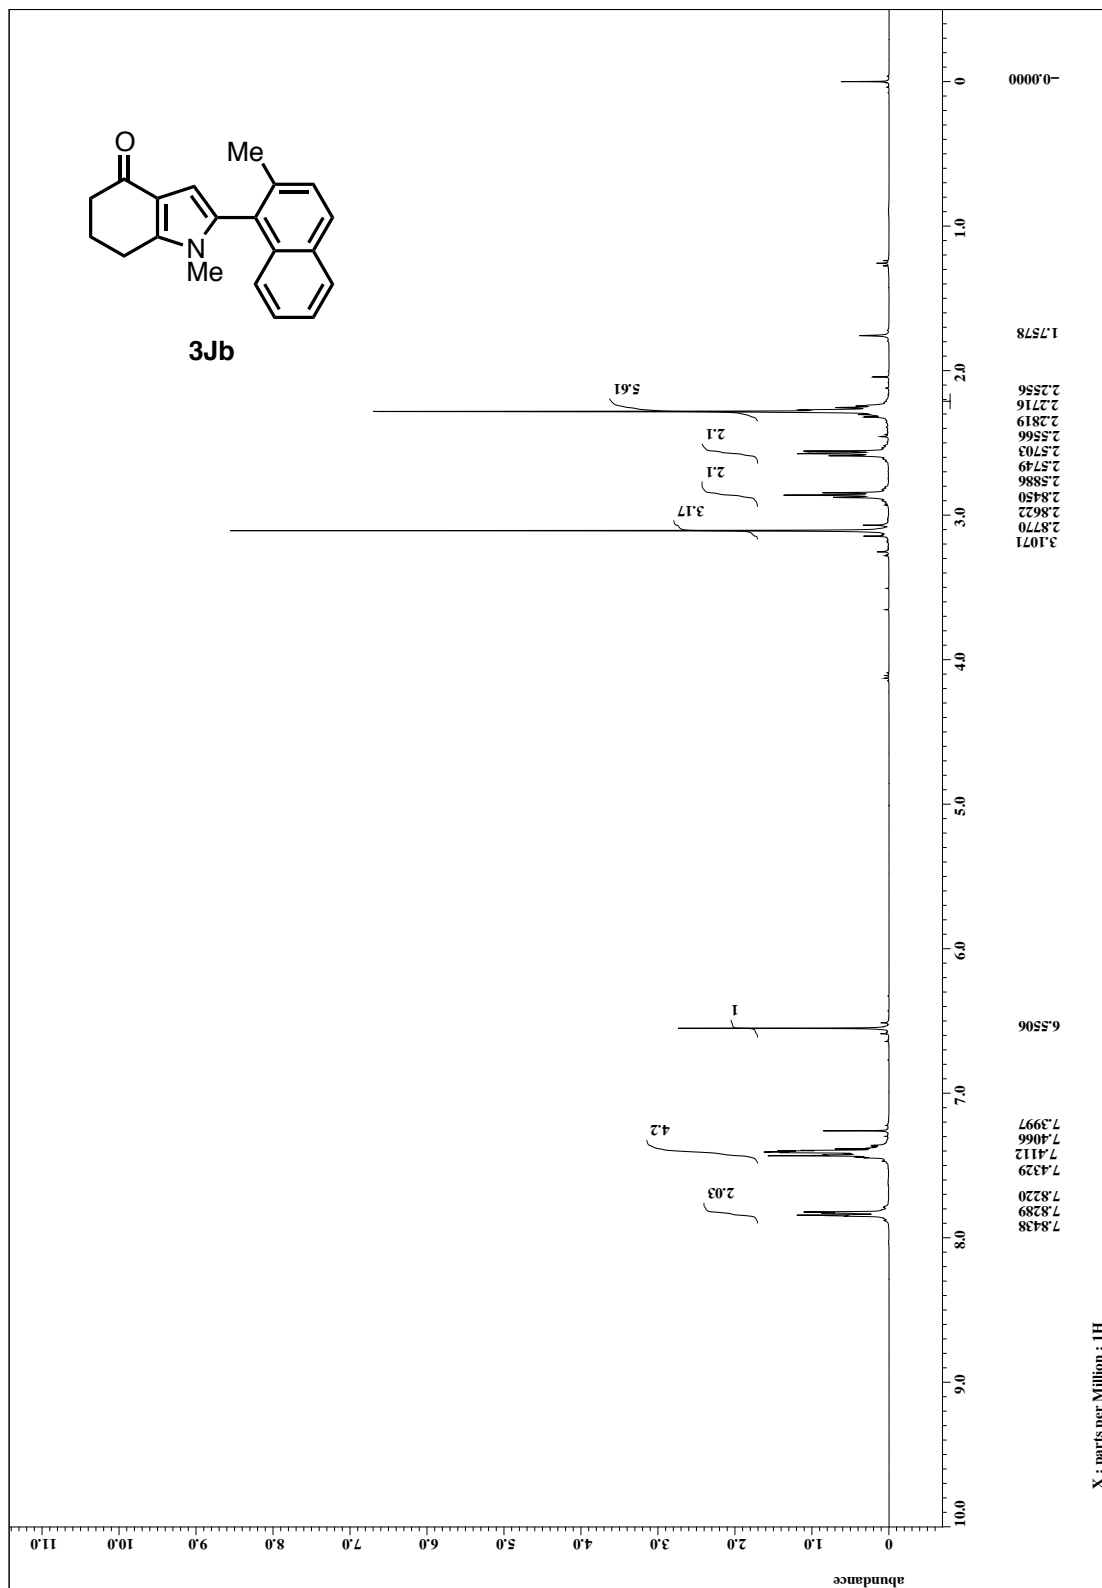

Supplementary Information (Yamaguchi, Kondo, Yamaguchi, Itami)  
Aromatic C–H Coupling with Hindered Arylboronic Acids by Pd/Fe Dual Catalysts

$^{13}\text{C}$  NMR (100 MHz,  $\text{CDCl}_3$ ) of 3Jb:

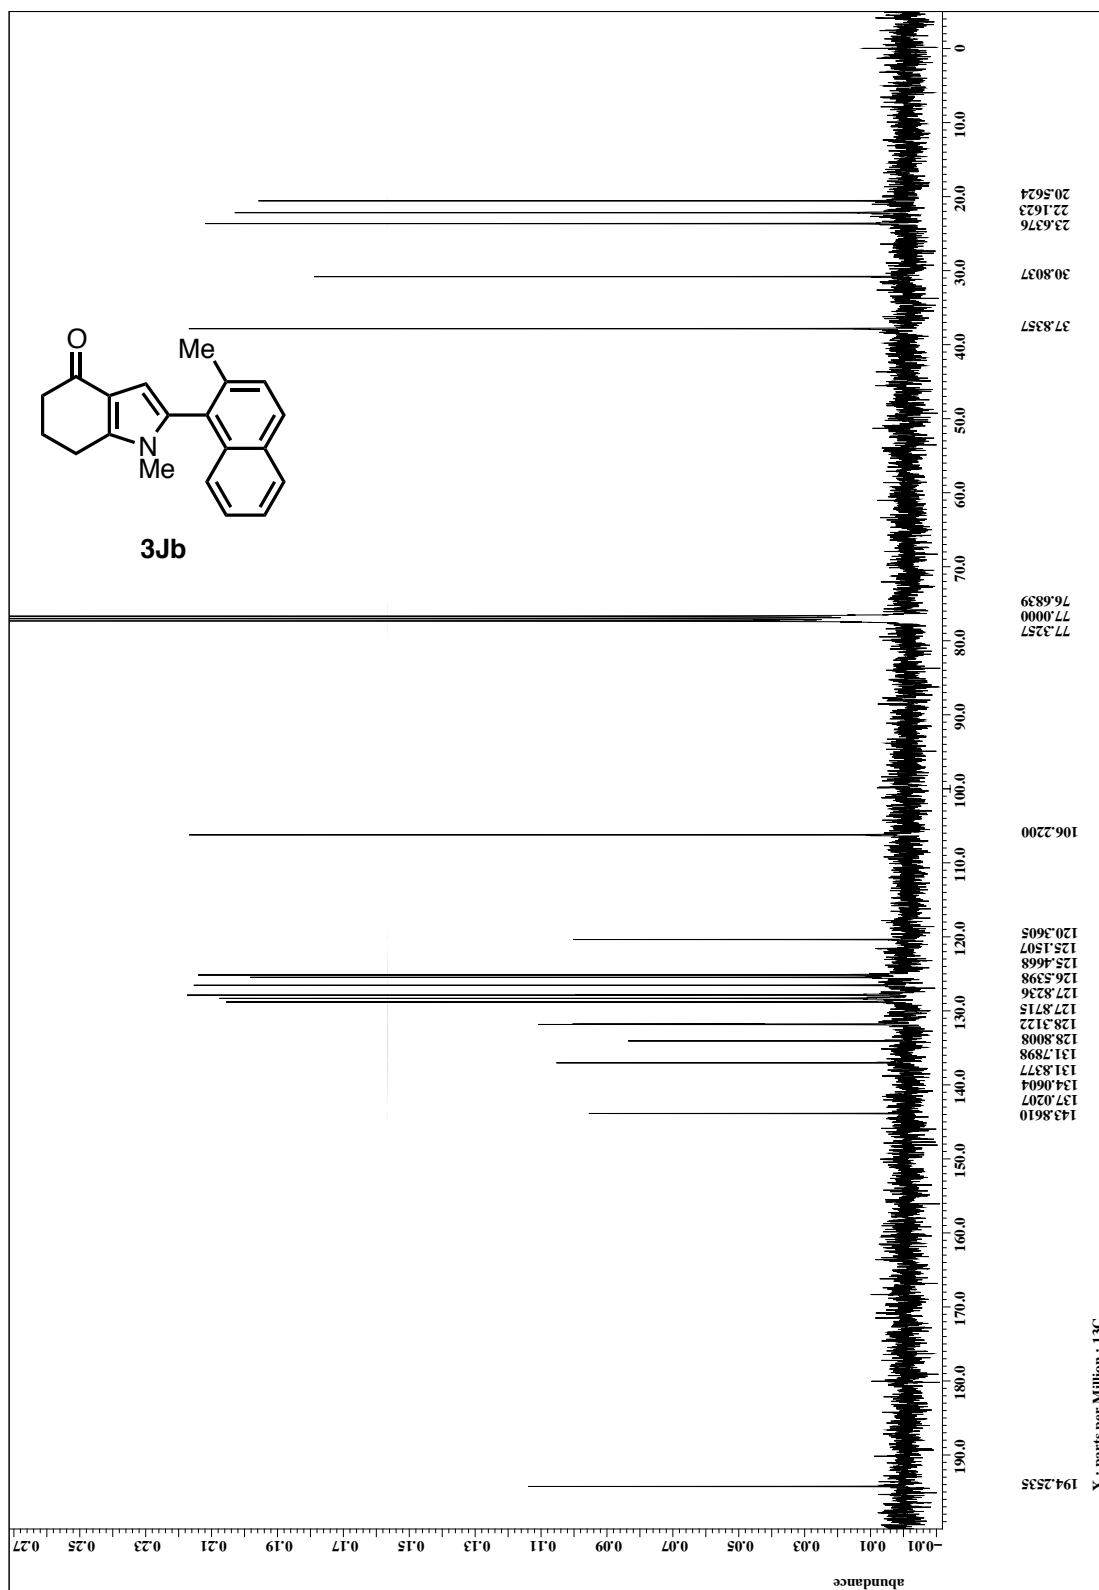

Supplementary Information (Yamaguchi, Kondo, Yamaguchi, Itami)  
Aromatic C–H Coupling with Hindered Arylboronic Acids by Pd/Fe Dual Catalysts

$^1\text{H}$  NMR (400 MHz,  $\text{CDCl}_3$ ) of 3Jd:

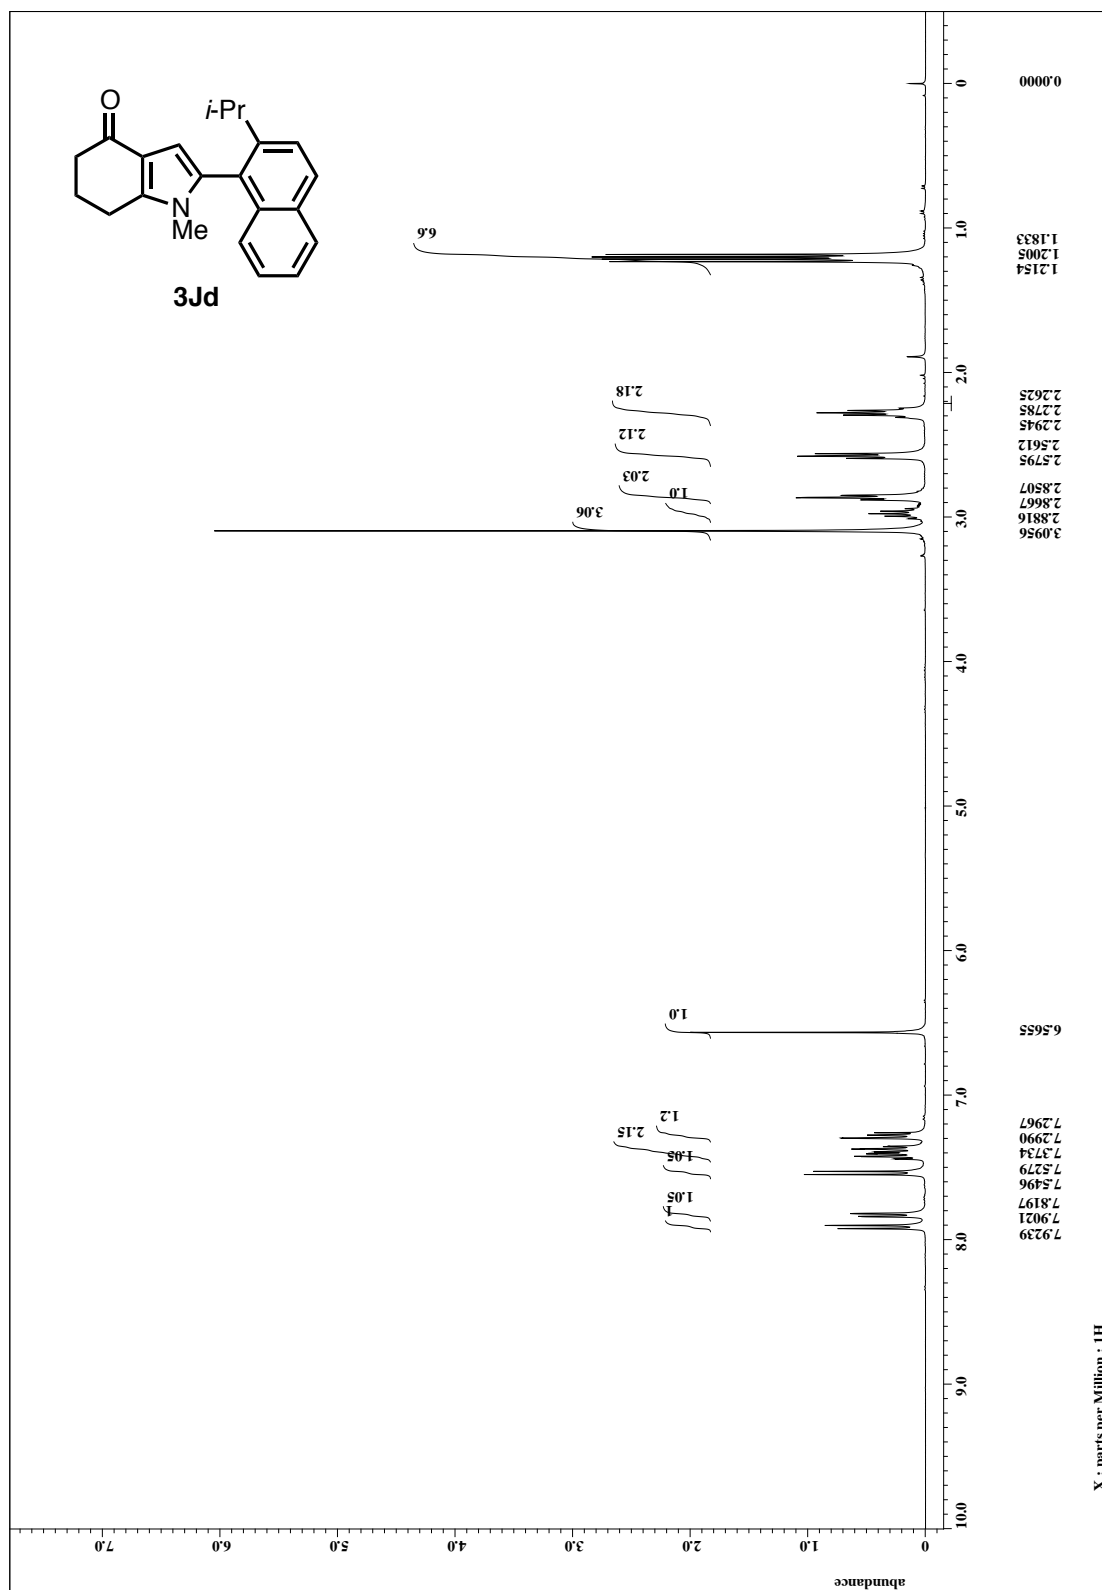

Supplementary Information (Yamaguchi, Kondo, Yamaguchi, Itami)  
Aromatic C–H Coupling with Hindered Arylboronic Acids by Pd/Fe Dual Catalysts

$^{13}\text{C}$  NMR (100 MHz,  $\text{CDCl}_3$ ) of 3Jd

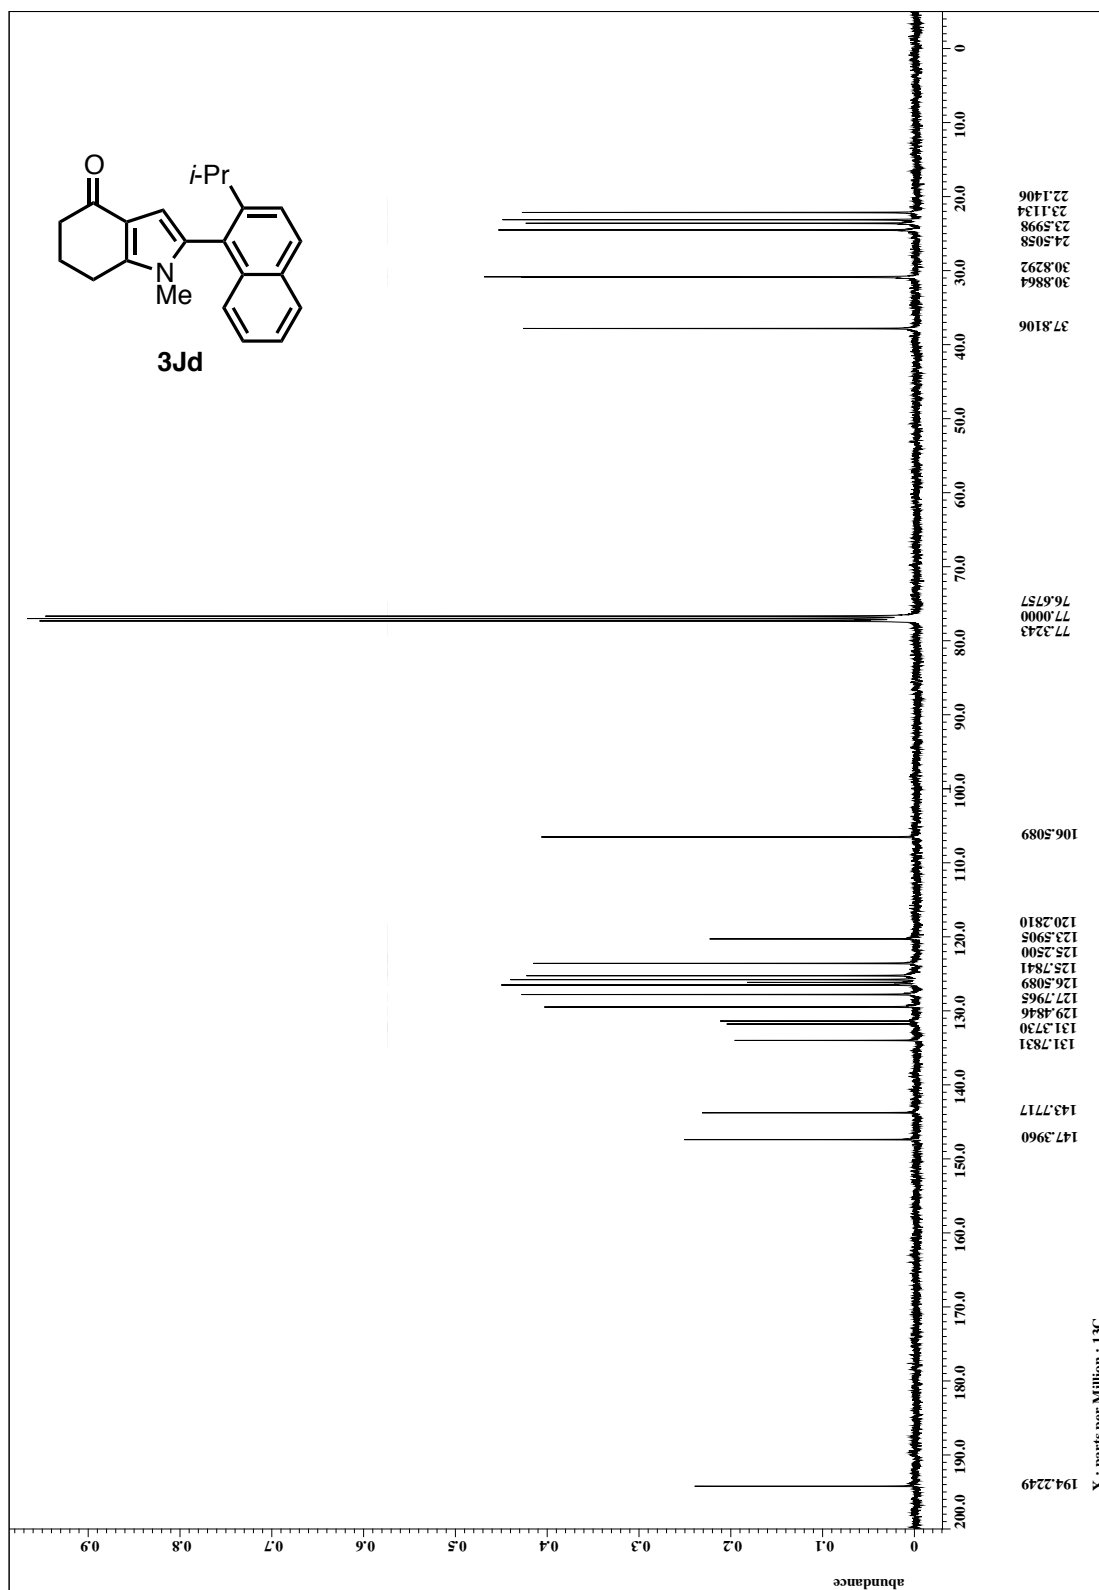

Supplementary Information (Yamaguchi, Kondo, Yamaguchi, Itami)  
Aromatic C–H Coupling with Hindered Arylboronic Acids by Pd/Fe Dual Catalysts

$^1\text{H}$  NMR (400 MHz,  $\text{CDCl}_3$ ) of 3Ka:

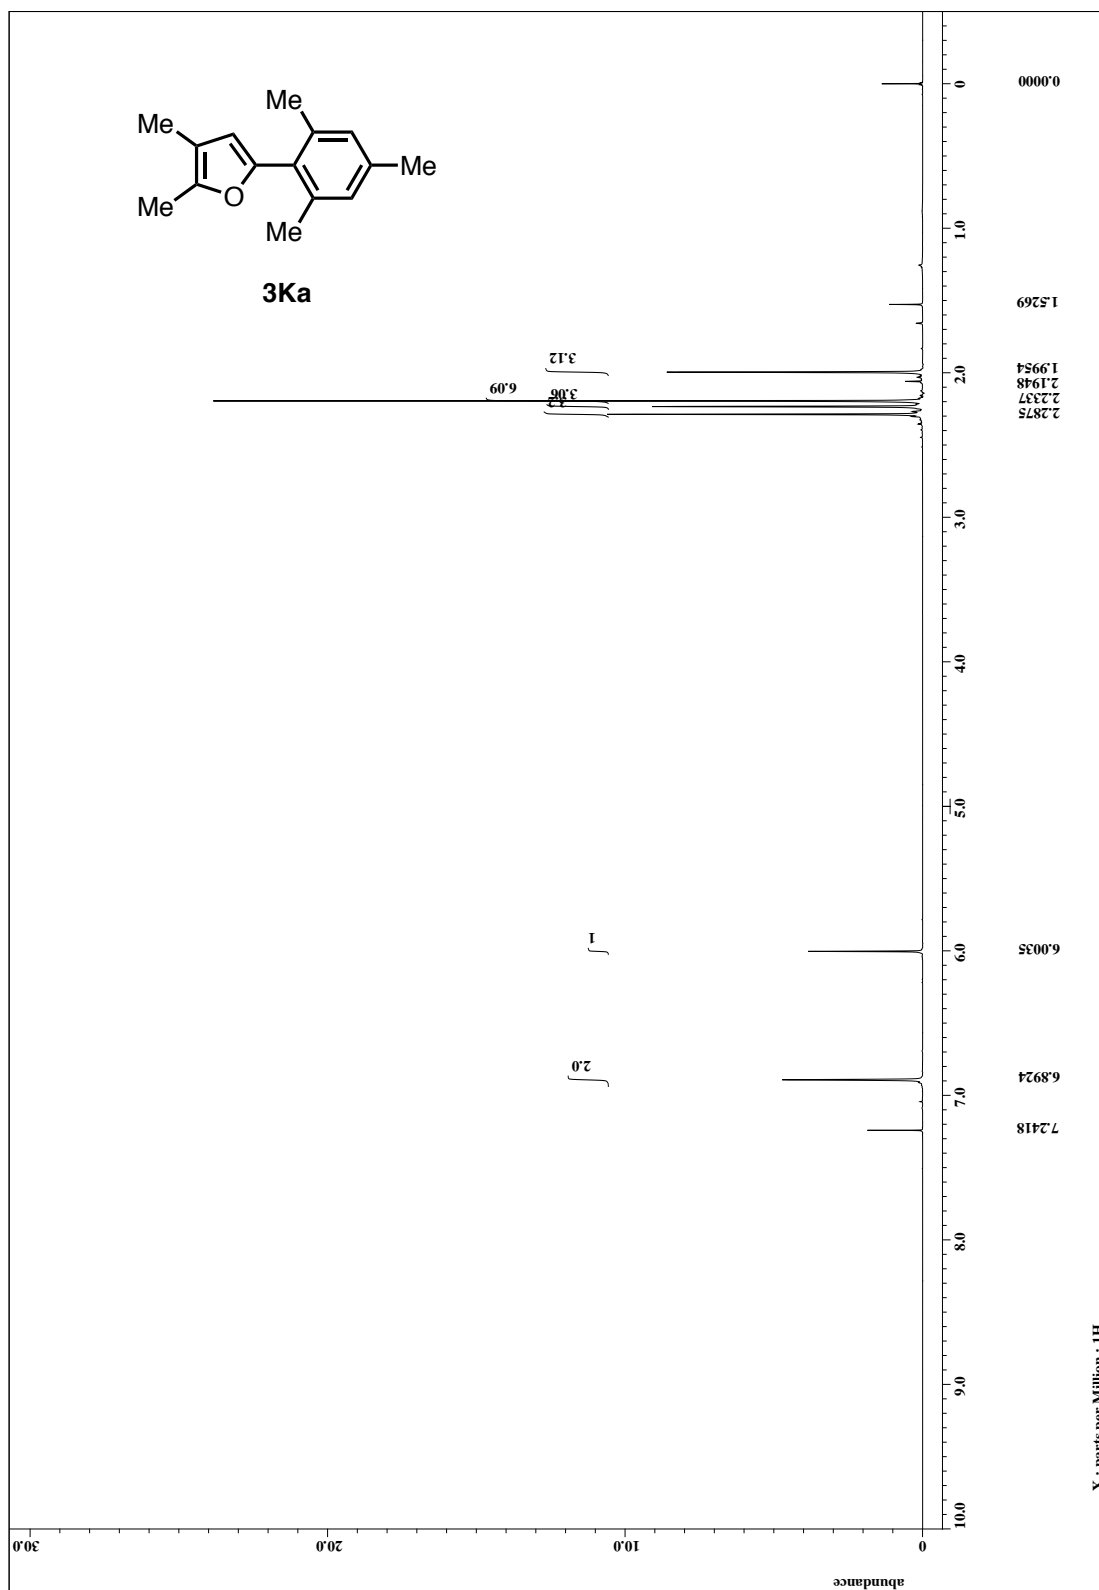

Supplementary Information (Yamaguchi, Kondo, Yamaguchi, Itami)  
Aromatic C–H Coupling with Hindered Arylboronic Acids by Pd/Fe Dual Catalysts

$^{13}\text{C}$  NMR (100 MHz,  $\text{CDCl}_3$ ) of 3Ka:

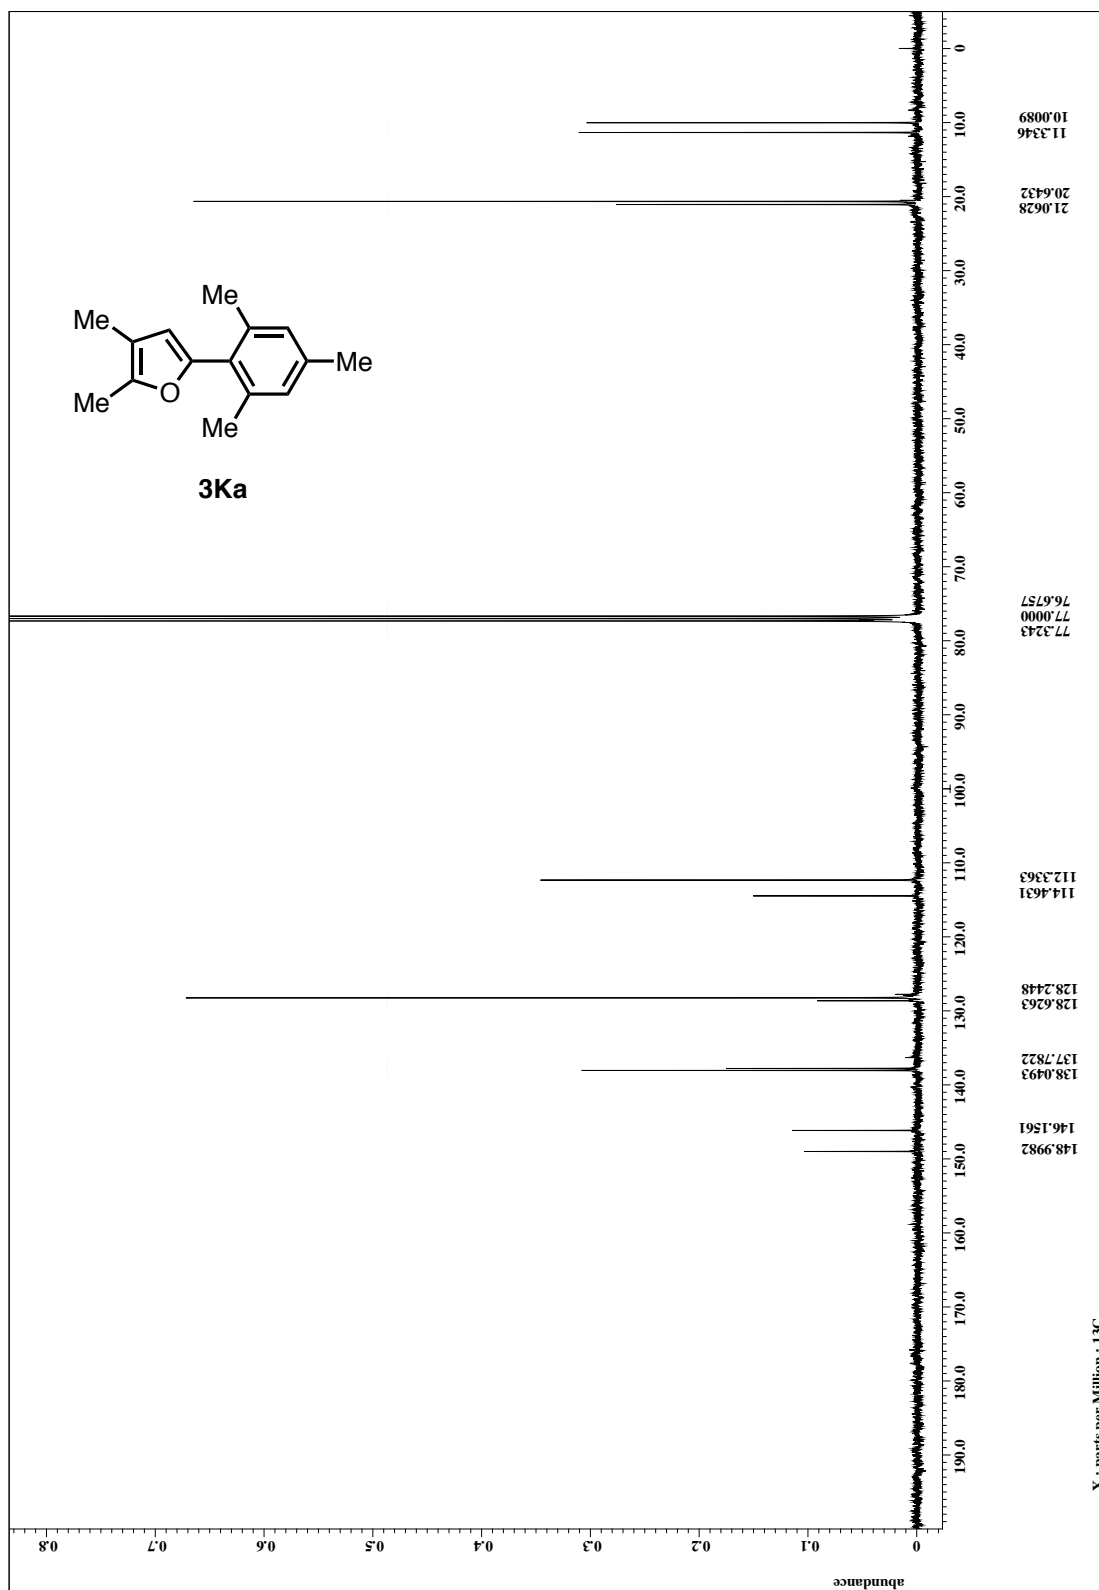

Supplementary Information (Yamaguchi, Kondo, Yamaguchi, Itami)  
Aromatic C–H Coupling with Hindered Arylboronic Acids by Pd/Fe Dual Catalysts

$^1\text{H}$  NMR (400 MHz,  $\text{CDCl}_3$ ) of 5La:

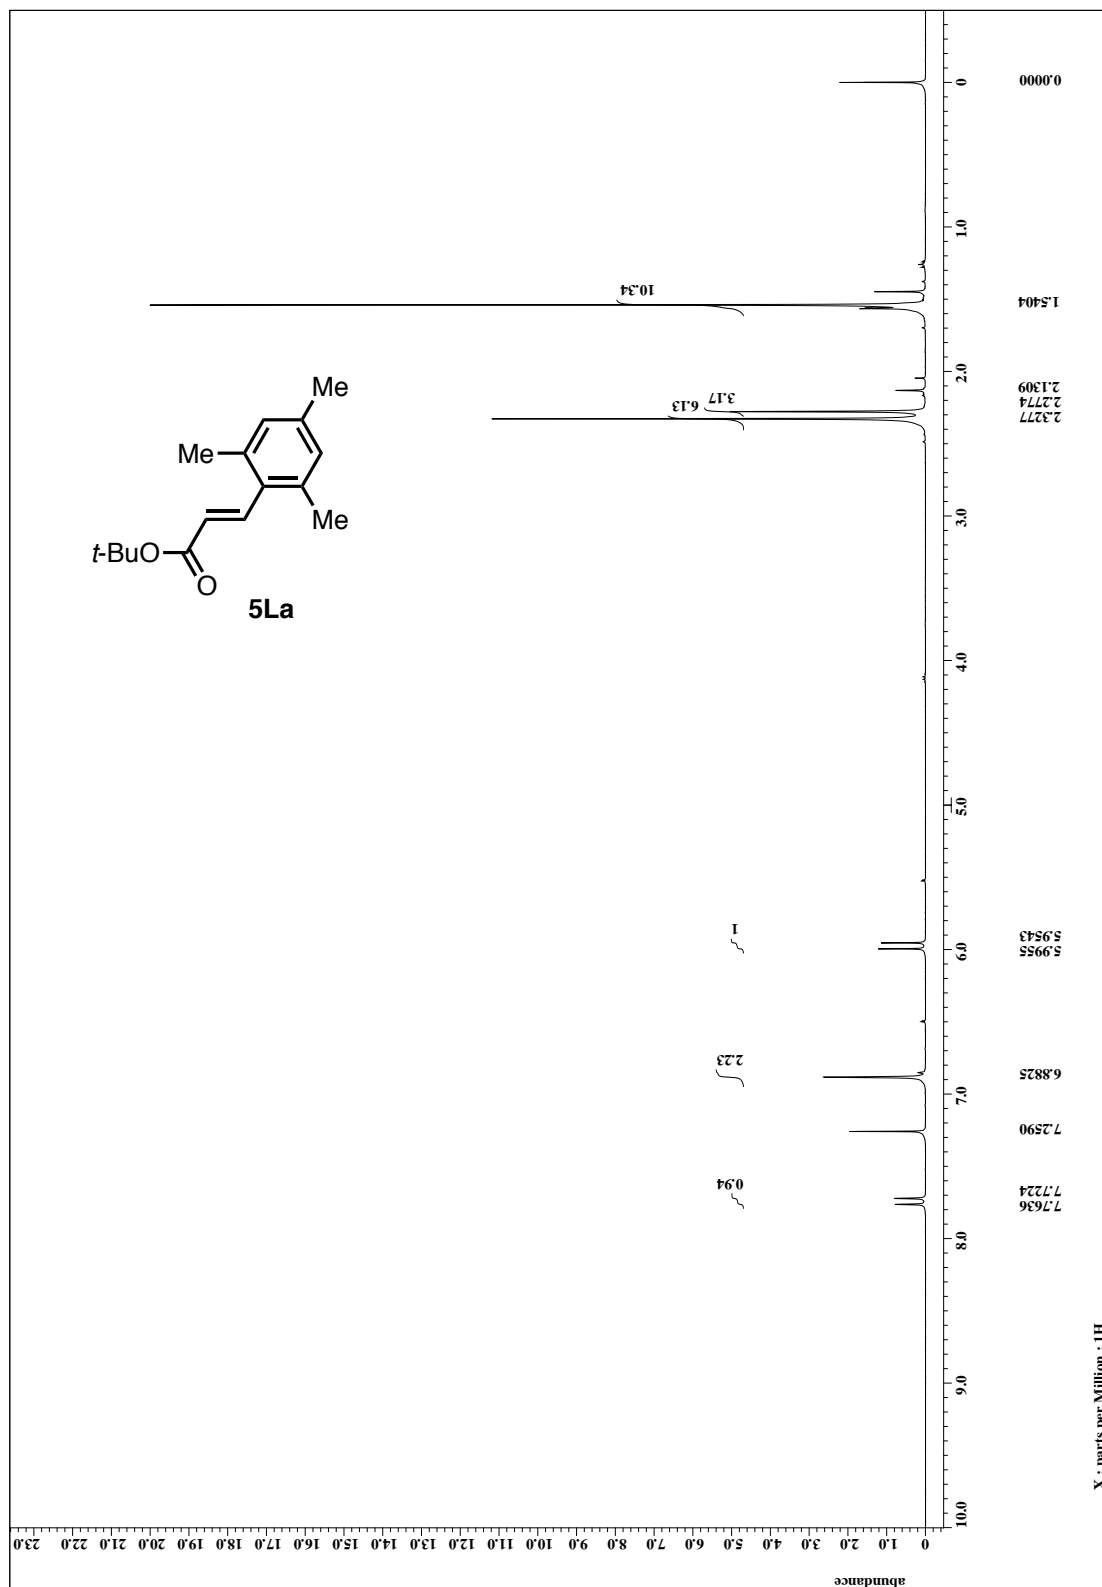



Supplementary Information (Yamaguchi, Kondo, Yamaguchi, Itami)  
Aromatic C–H Coupling with Hindered Arylboronic Acids by Pd/Fe Dual Catalysts

$^{13}\text{C}$  NMR (100 MHz,  $\text{CDCl}_3$ ) of 5La:

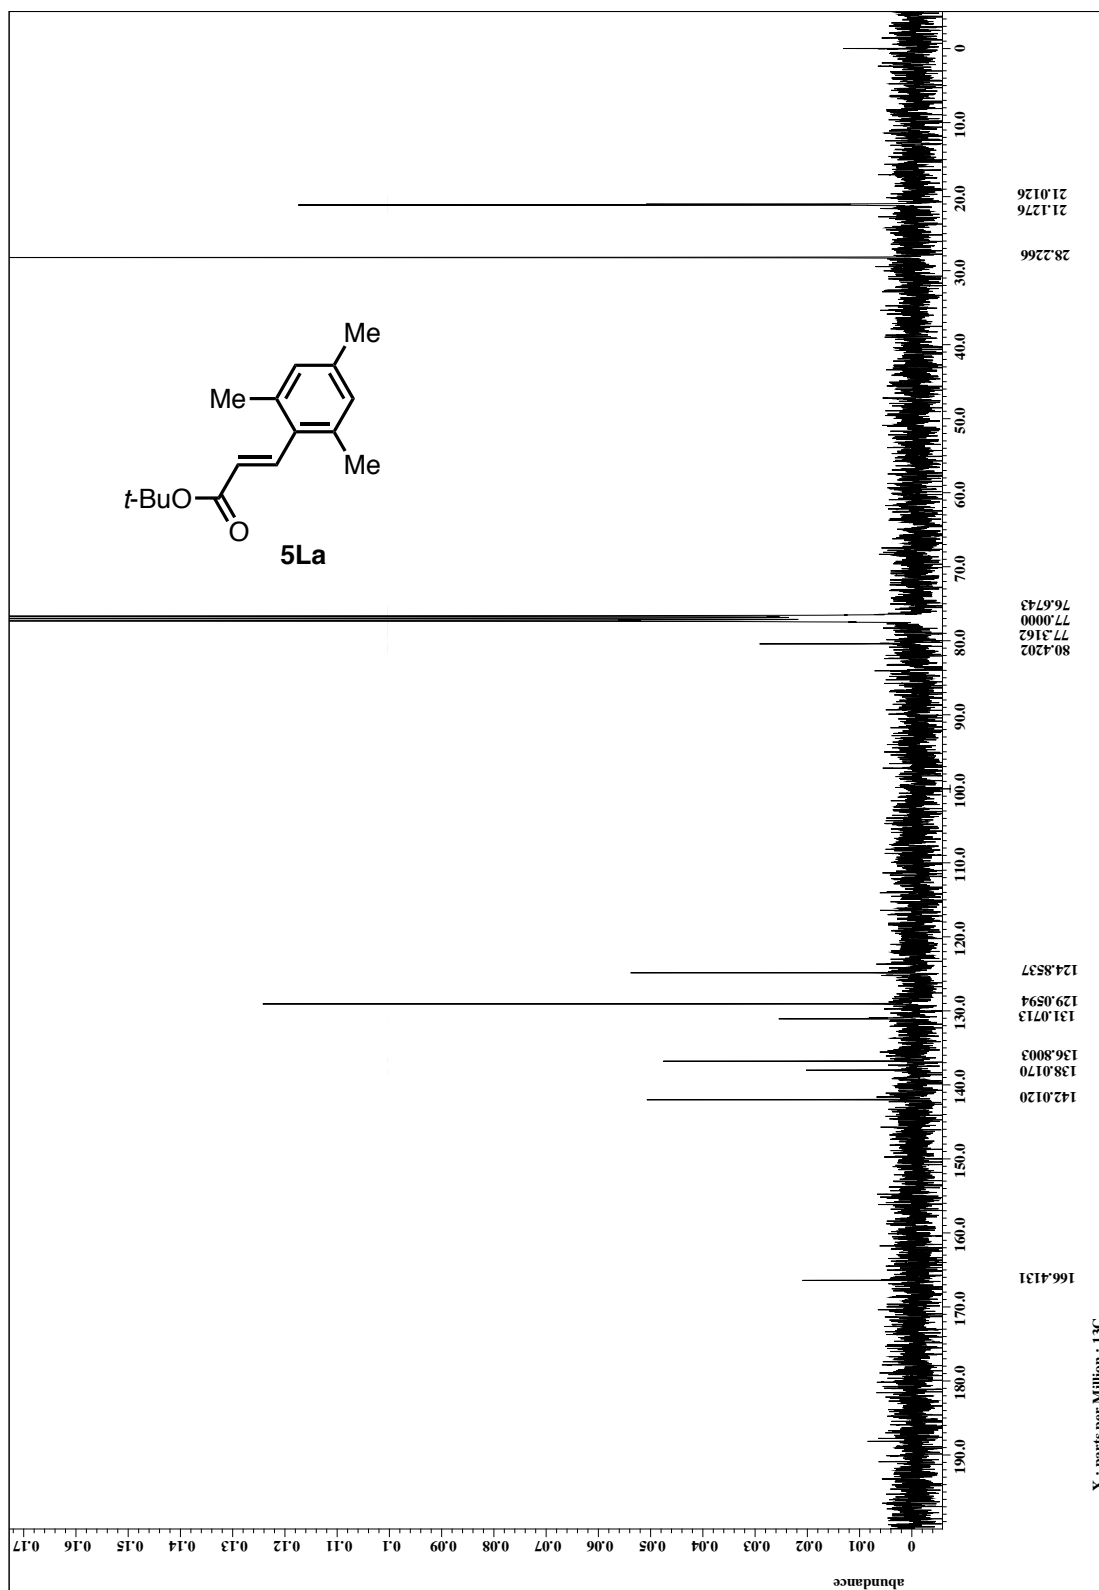

Supplementary Information (Yamaguchi, Kondo, Yamaguchi, Itami)  
Aromatic C–H Coupling with Hindered Arylboronic Acids by Pd/Fe Dual Catalysts

$^1\text{H}$  NMR (400 MHz,  $\text{CDCl}_3$ ) of 5Ma:

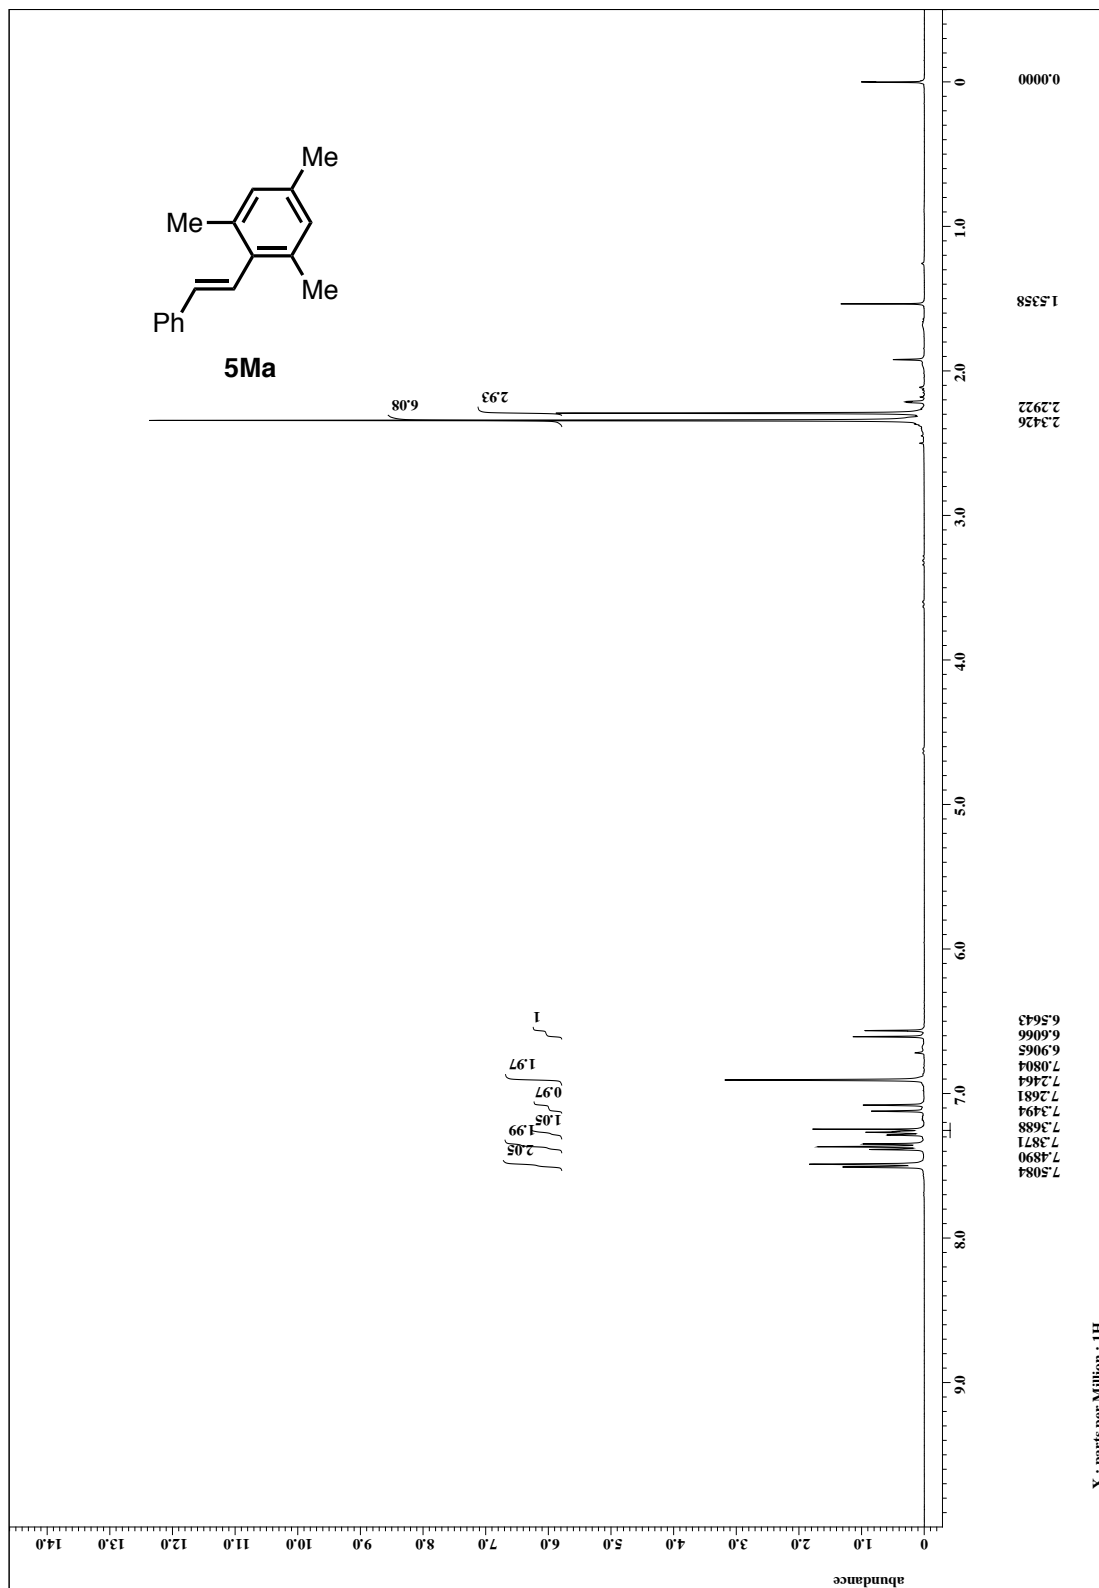

Supplementary Information (Yamaguchi, Kondo, Yamaguchi, Itami)  
Aromatic C–H Coupling with Hindered Arylboronic Acids by Pd/Fe Dual Catalysts

$^{13}\text{C}$  NMR (100 MHz,  $\text{CDCl}_3$ ) of 5Ma:

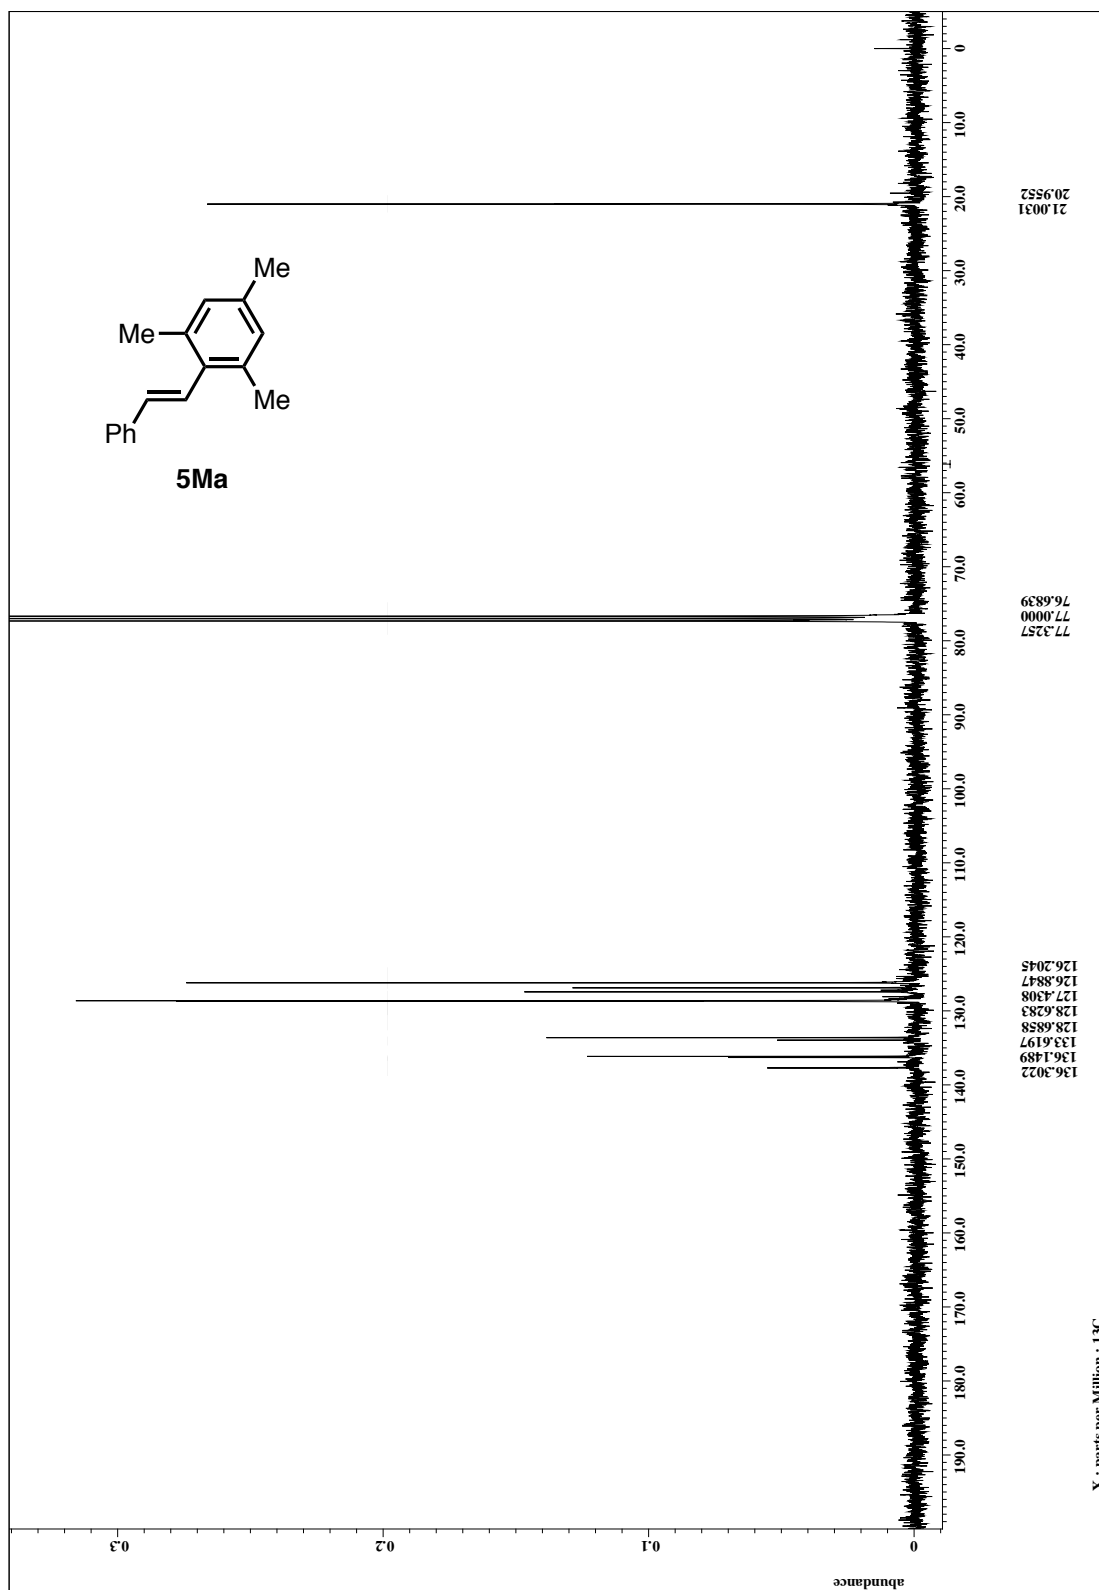

Supplementary Information (Yamaguchi, Kondo, Yamaguchi, Itami)  
Aromatic C–H Coupling with Hindered Arylboronic Acids by Pd/Fe Dual Catalysts

$^1\text{H}$  NMR (400 MHz,  $\text{CDCl}_3$ ) of 5Na:

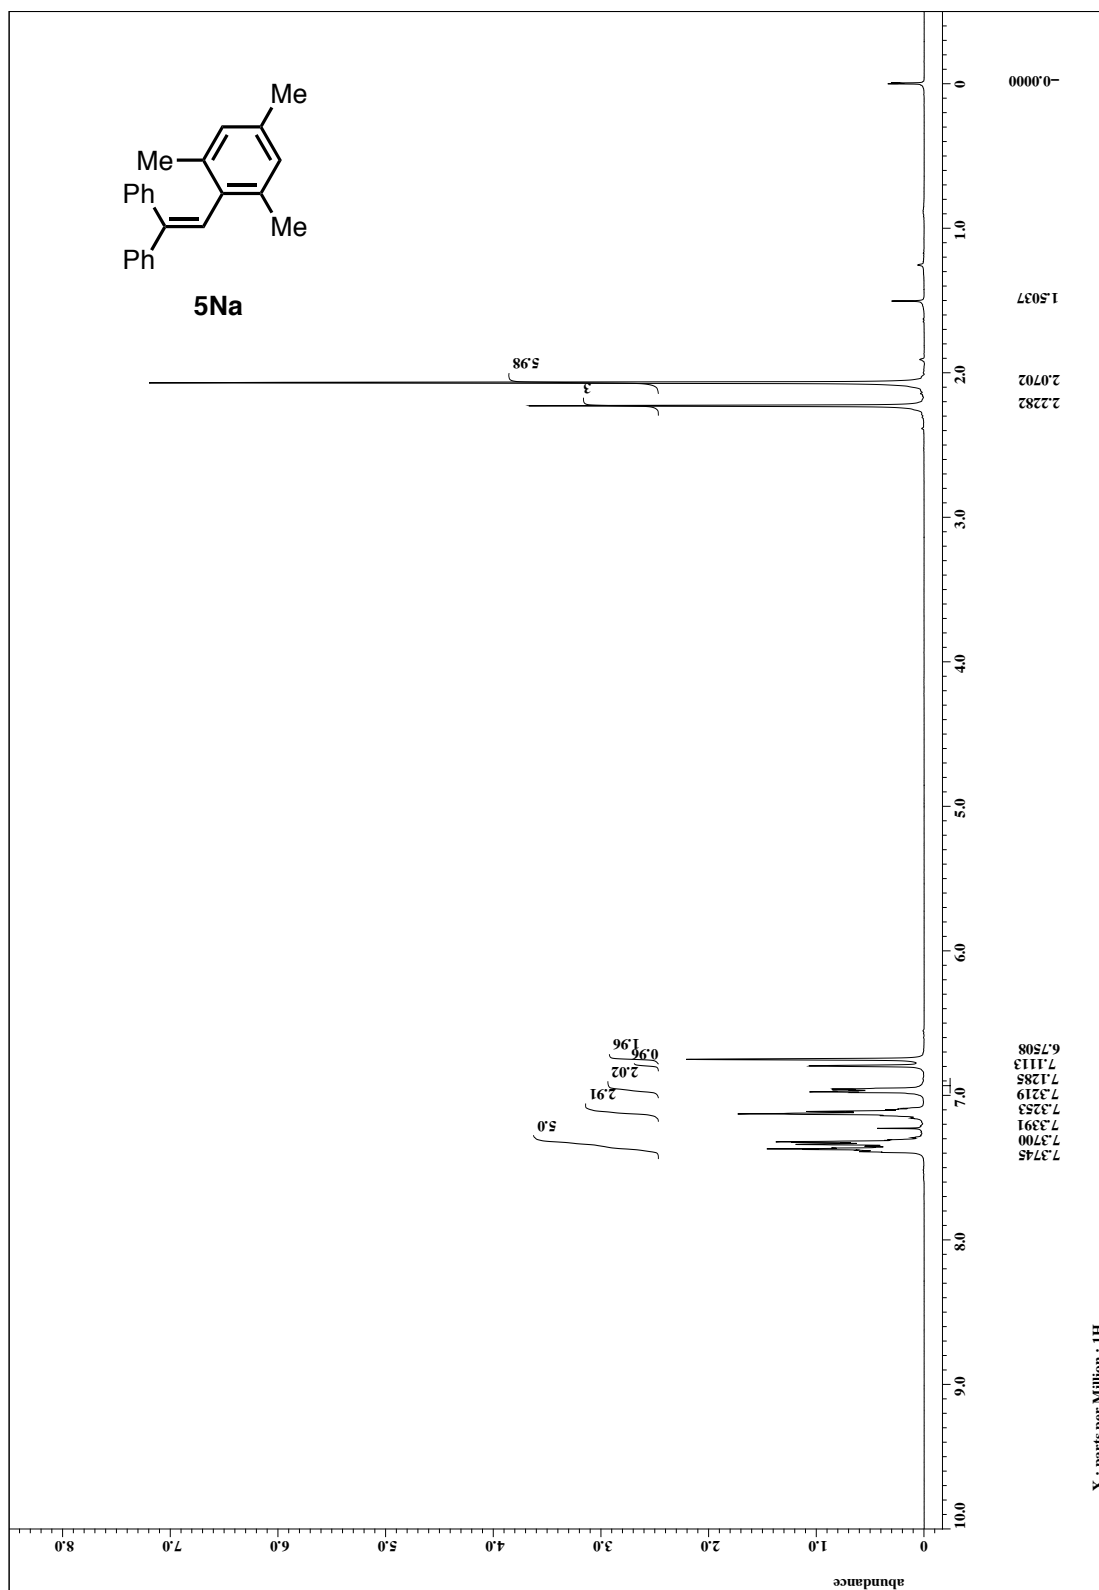

Supplementary Information (Yamaguchi, Kondo, Yamaguchi, Itami)  
Aromatic C–H Coupling with Hindered Arylboronic Acids by Pd/Fe Dual Catalysts

$^{13}\text{C}$  NMR (100 MHz,  $\text{CDCl}_3$ ) of 5Na:

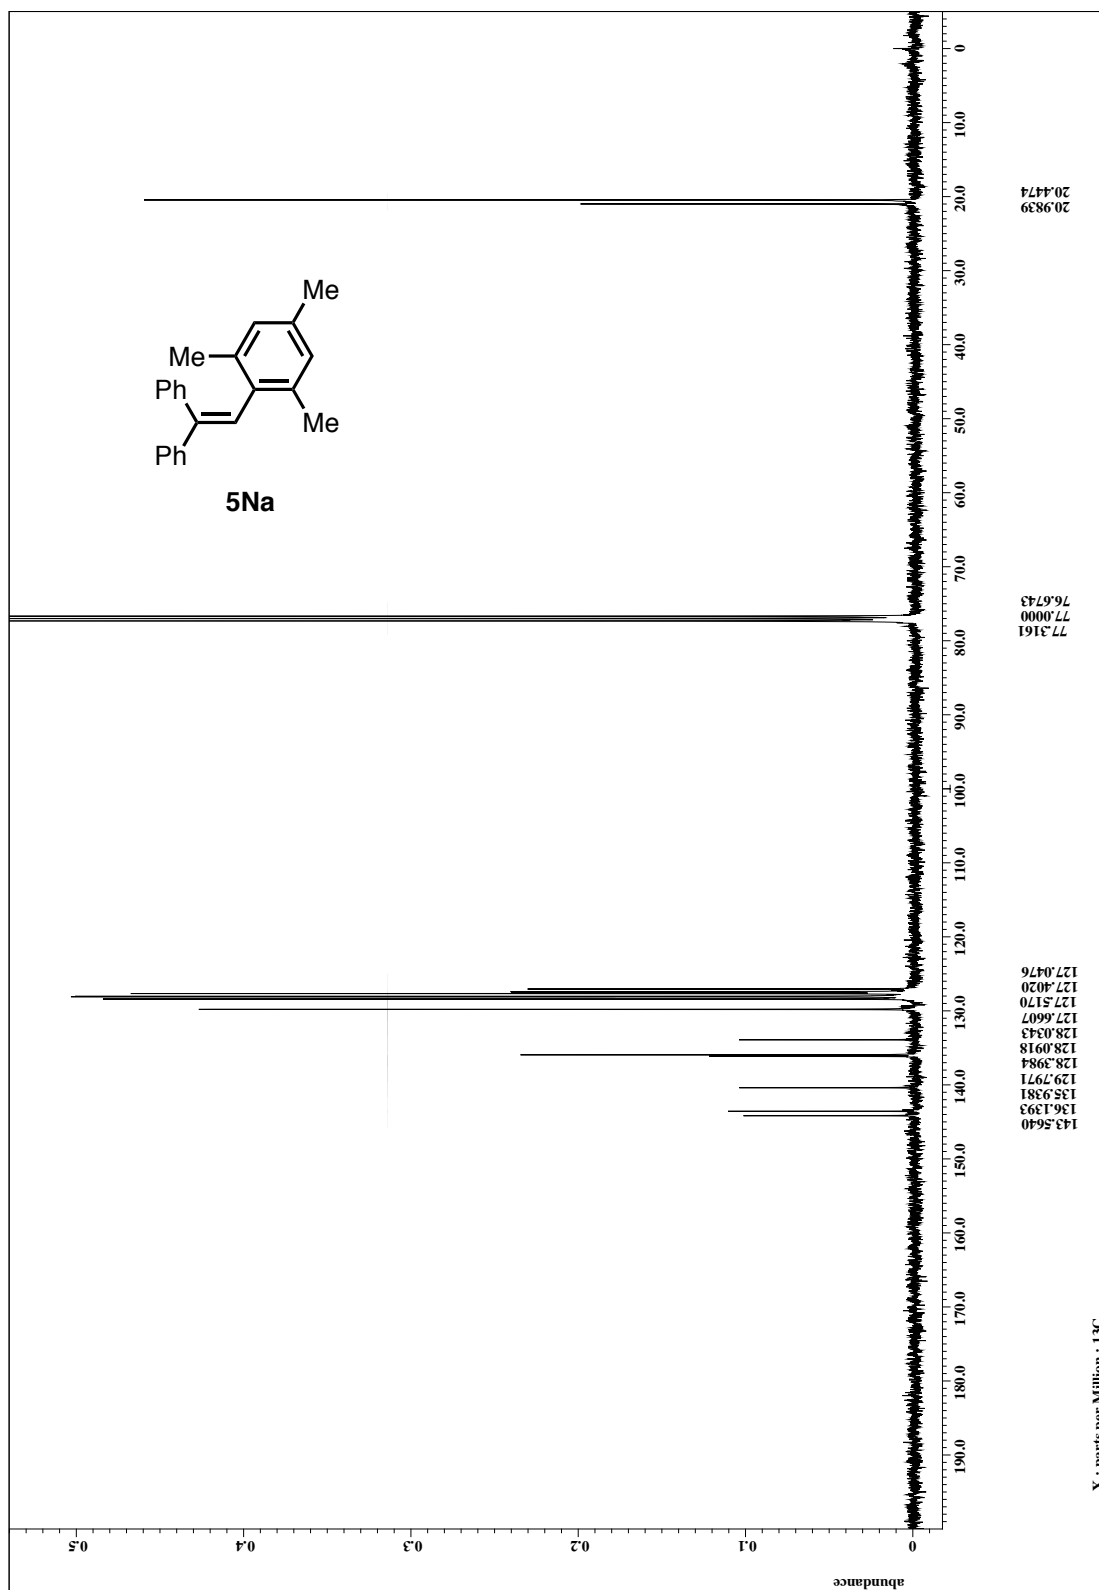

Supplementary Information (Yamaguchi, Kondo, Yamaguchi, Itami)  
Aromatic C–H Coupling with Hindered Arylboronic Acids by Pd/Fe Dual Catalysts

$^1\text{H}$  NMR (400 MHz,  $\text{CDCl}_3$ ) of sox ligand:

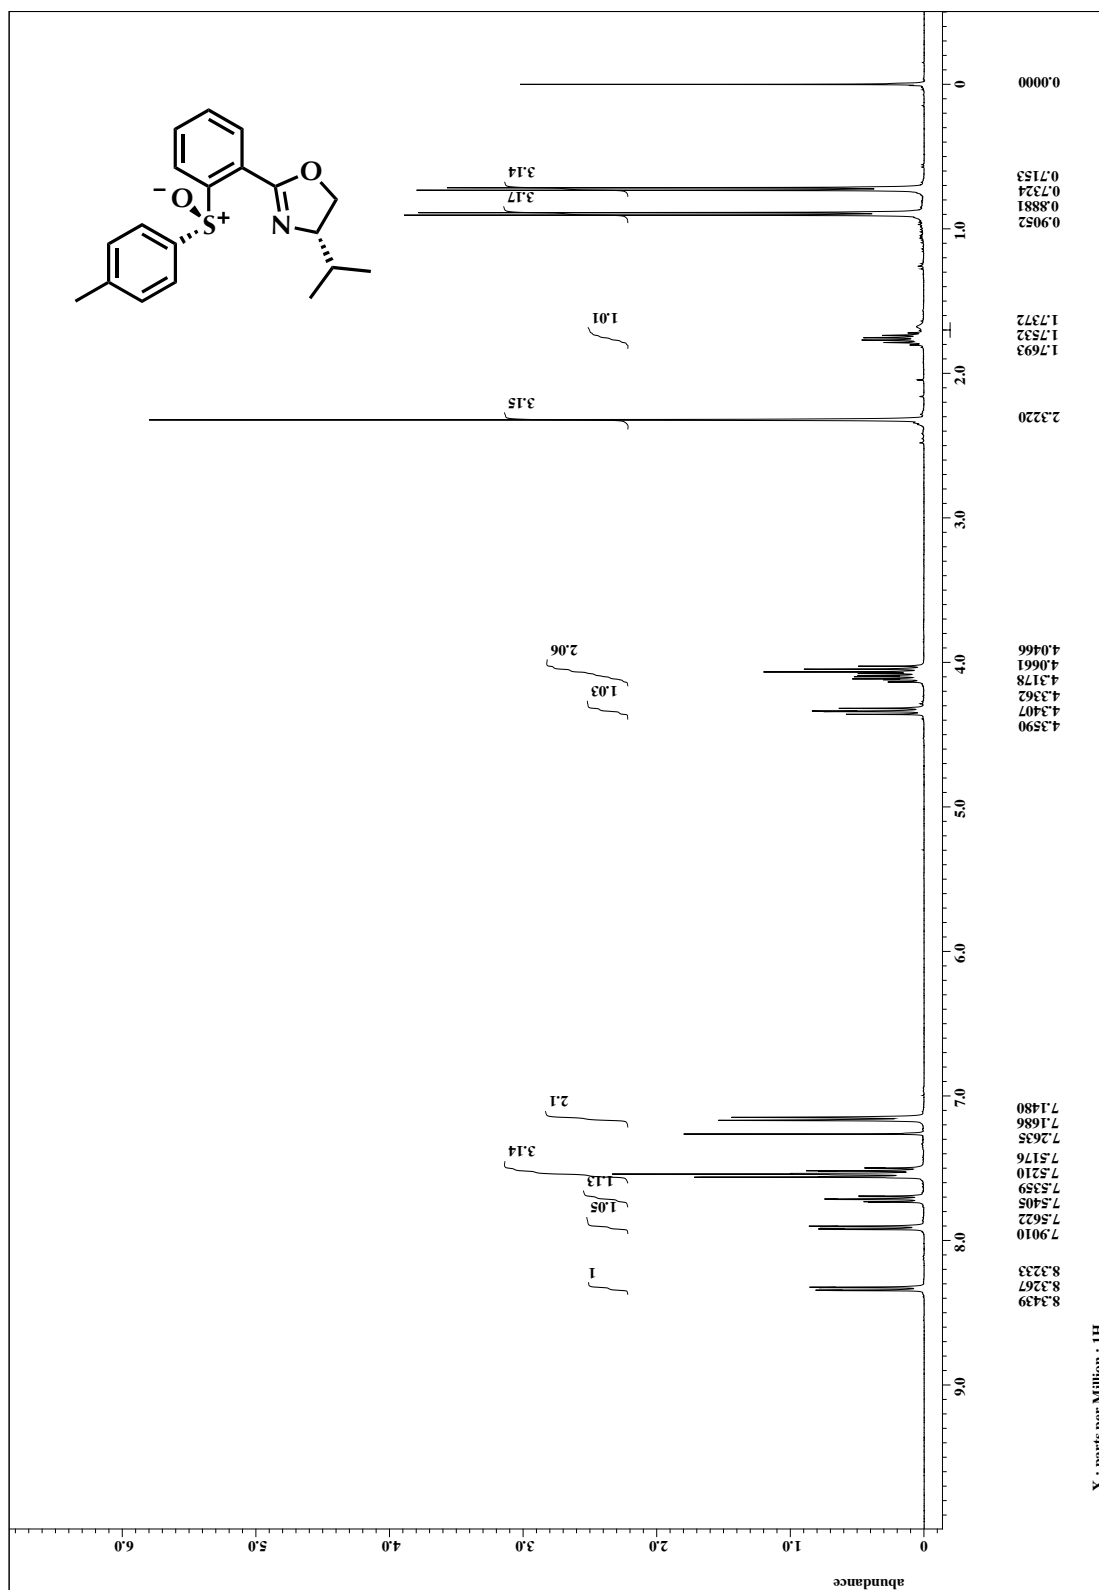

Supplementary Information (Yamaguchi, Kondo, Yamaguchi, Itami)  
Aromatic C–H Coupling with Hindered Arylboronic Acids by Pd/Fe Dual Catalysts

$^{13}\text{C}$  NMR (100 MHz,  $\text{CDCl}_3$ ) of sox ligand

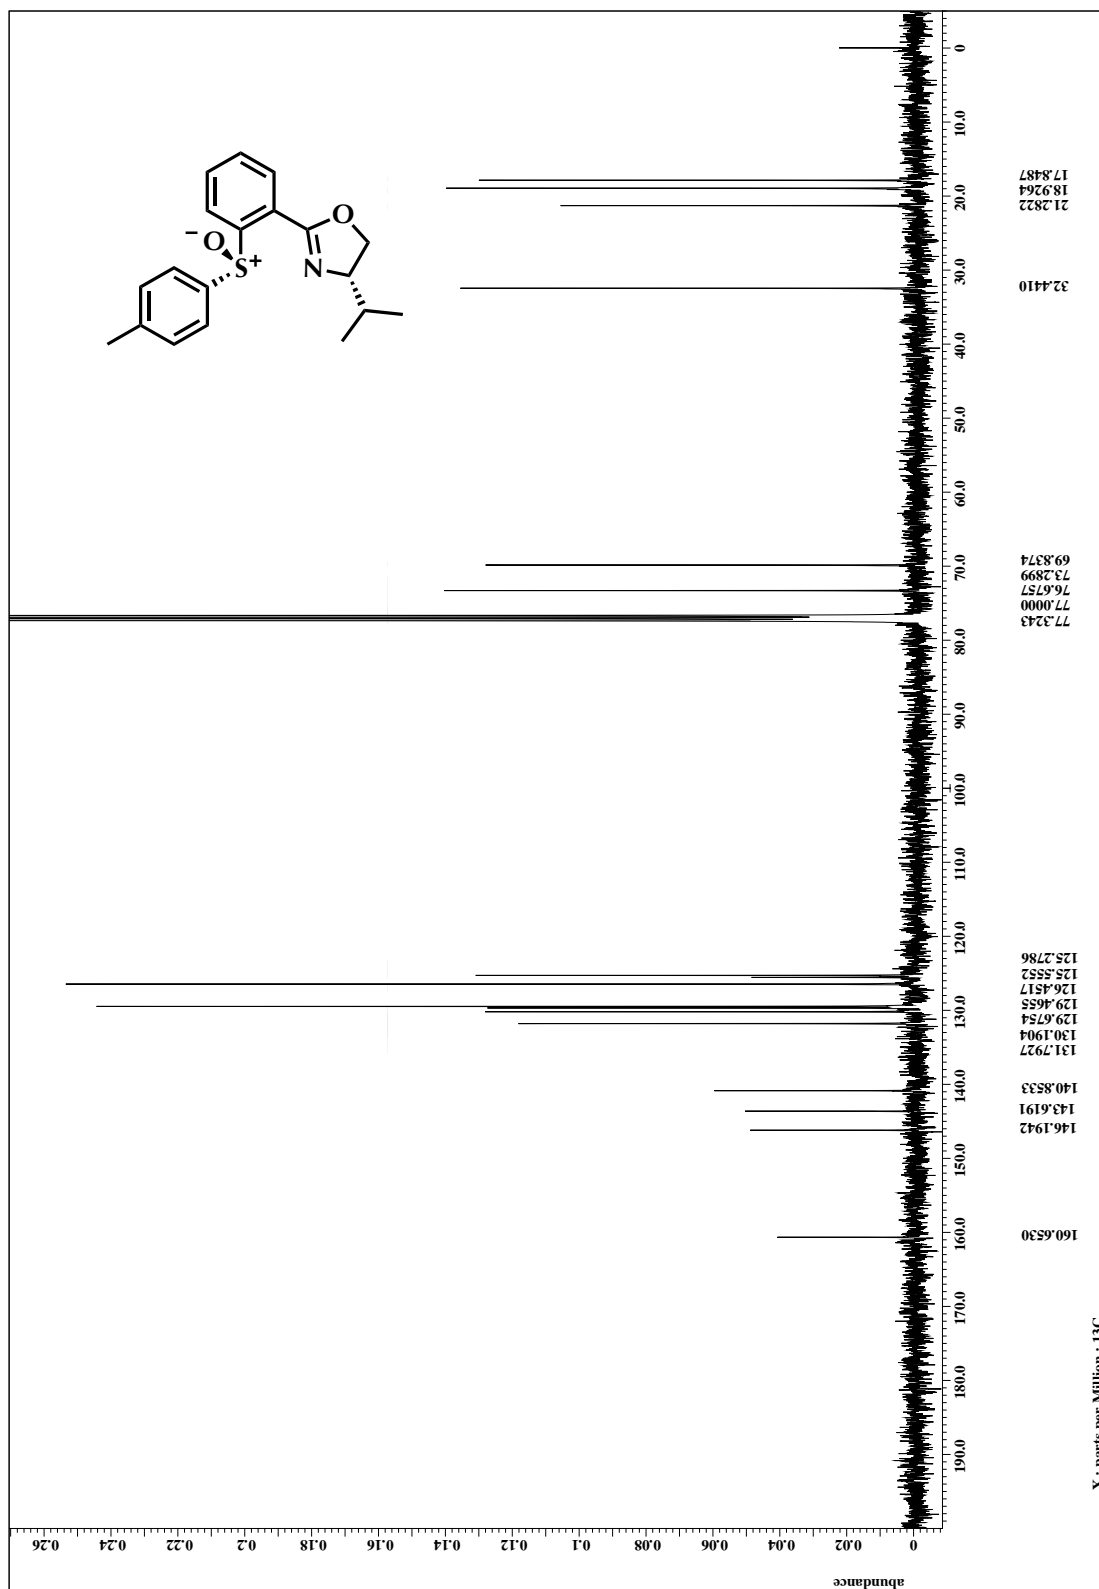

Supplementary Information (Yamaguchi, Kondo, Yamaguchi, Itami)  
Aromatic C–H Coupling with Hindered Arylboronic Acids by Pd/Fe Dual Catalysts

$^1\text{H}$  NMR (400 MHz,  $\text{CDCl}_3$ ) of Pd-sox complex:

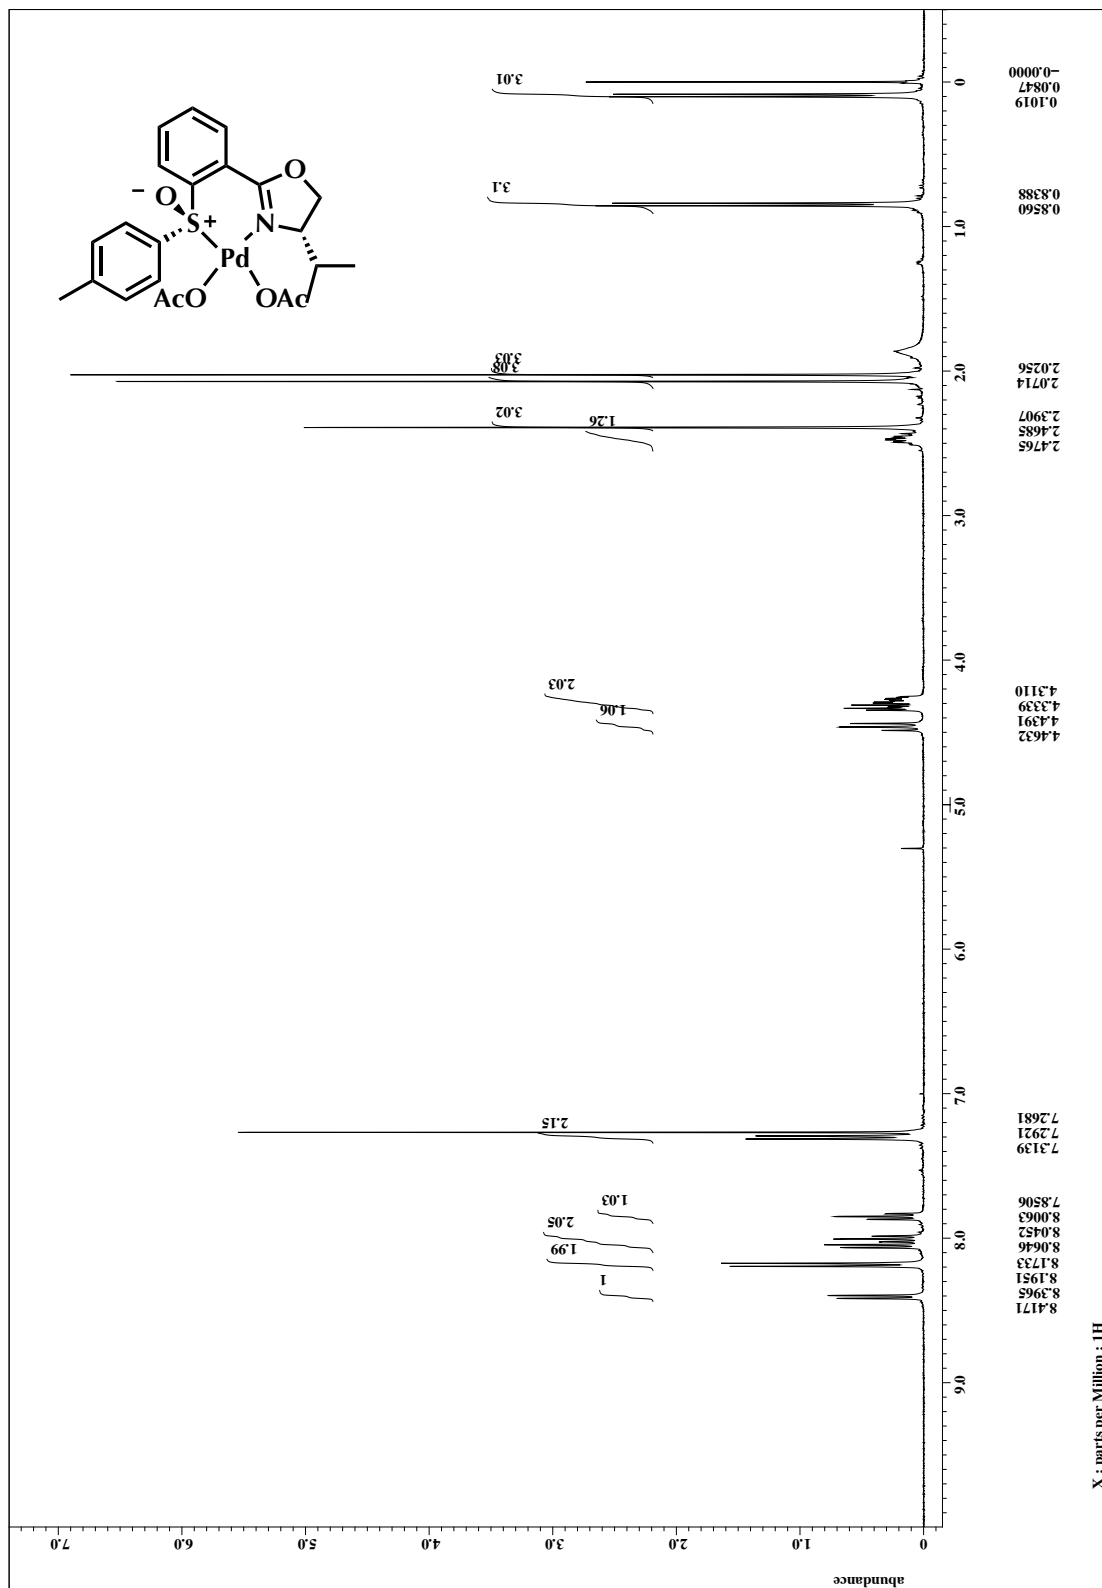



Supplementary Information (Yamaguchi, Kondo, Yamaguchi, Itami)  
Aromatic C–H Coupling with Hindered Arylboronic Acids by Pd/Fe Dual Catalysts

$^{13}\text{C}$  NMR (100 MHz,  $\text{CDCl}_3$ ) of Pd-sox complex:

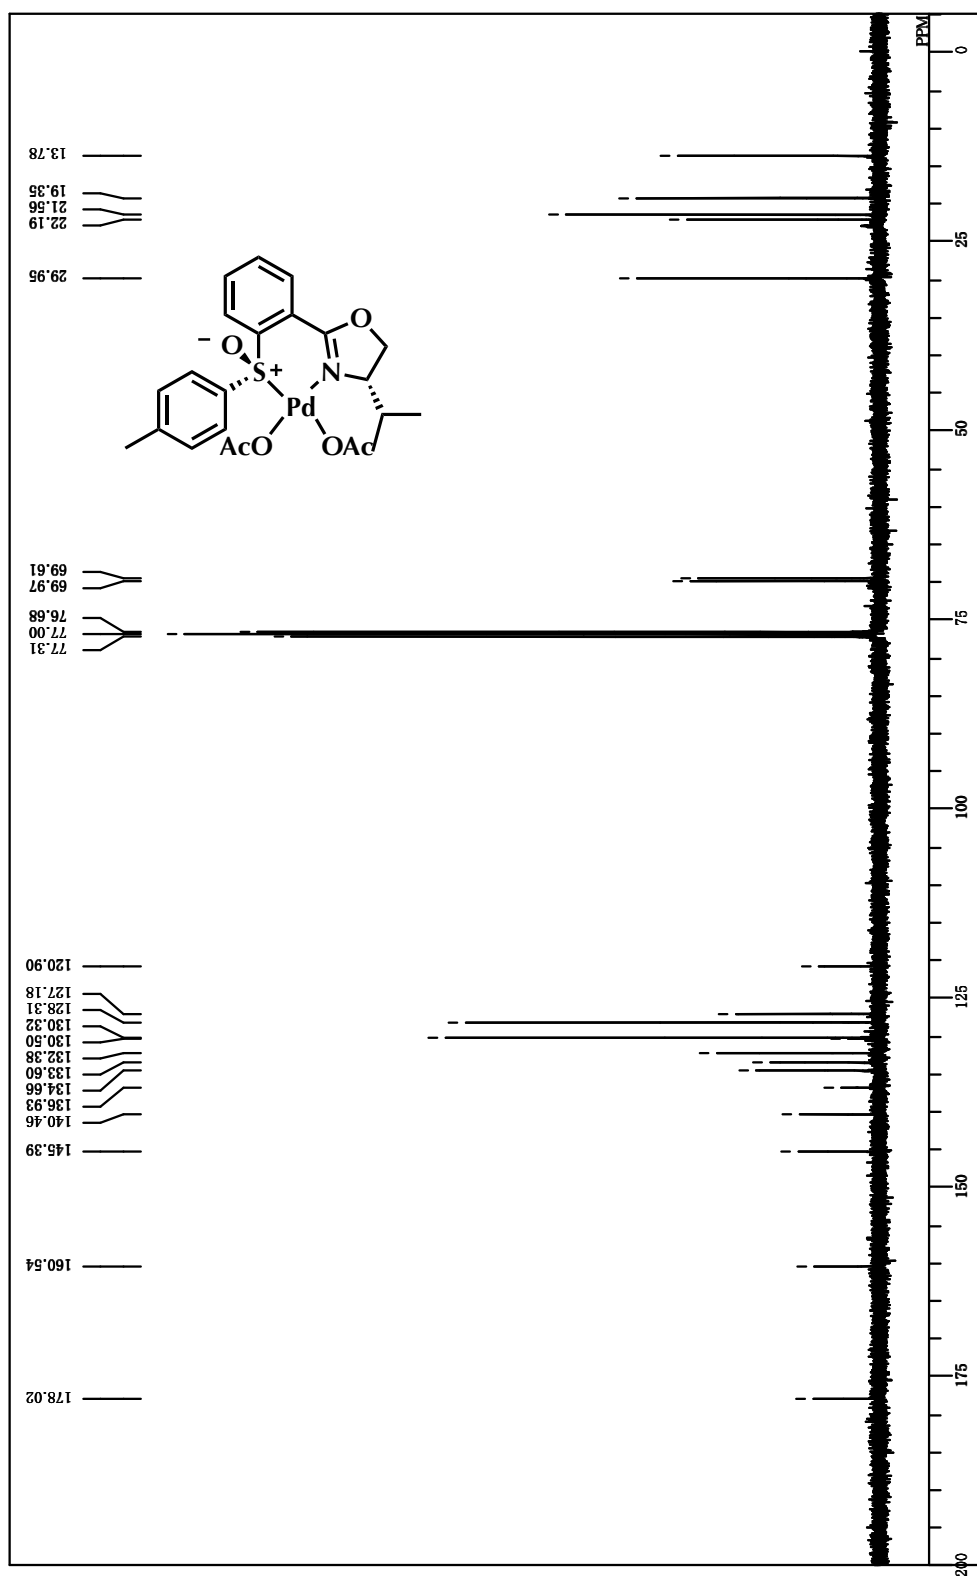

Supplement: c3sc51206a.pdf [file c3sc51206a.pdf]
